# Supplementary material
Source: PubMed Central journal article supplement (PMC2819183)
Supplement: NIHMS171639-supplement-Supplementary.pdf [file NIHMS171639-supplement-Supplementary.pdf]

# Enantioselective Addition of Boronates to Acyl Imines Catalyzed by Chiral Biphenols

Joshua A. Bishop, Sha Lou, Scott E. Schaus\*

*Department of Chemistry, Center for Chemical Methodology and Library Development at Boston University (CMLD-BU)  
Life Science and Engineering Building, Boston University  
24 Cummington Street, Boston, Massachusetts 02215*

## Supporting Information

### Table of Contents

|                                                                                                           |     |
|-----------------------------------------------------------------------------------------------------------|-----|
| General information.....                                                                                  | S2  |
| Procedure for synthesis of Aryl and Alkenyl di- <i>n</i> Butyl substituted boronates.....                 | S3  |
| General procedure for asymmetric arylboration of acyl imines.....                                         | S3  |
| Analytical data for new diaryl amides.....                                                                | S3  |
| General procedure for asymmetric vinylboration of acyl imines.....                                        | S6  |
| Analytical data for new vinyl amides.....                                                                 | S6  |
| Procedure for synthesis of alkynyl di- <i>n</i> Butyl substituted boronates.....                          | S8  |
| General procedure for asymmetric alkynylboration of acyl imines.....                                      | S8  |
| Analytical data for new propargyl amides.....                                                             | S8  |
| Absolute stereochemistry determination of aryl amide products and Formal Synthesis of Levocetirizine..... | S12 |
| Absolute stereochemistry determination of vinyl amide products.....                                       | S12 |
| Absolute stereochemistry determination of propargyl amide products.....                                   | S12 |
| Direct Injection MS Studies.....                                                                          | S13 |
| HPLC Analysis of Chiral Aryl Amide Products.....                                                          | S15 |
| HPLC Analysis of Chiral Vinyl Amide Products.....                                                         | S27 |
| HPLC Analysis of Chiral Propargyl Amide Products.....                                                     | S38 |
| References.....                                                                                           | S49 |

**General Information.** All  $^1\text{H}$  NMR, and  $^{13}\text{C}$  NMR spectra were recorded using Varian Unity Plus 400 (93.94 kG,  $^1\text{H}$  400 MHz) or Varian Gemini 300 (70.5 kG,  $^{13}\text{C}$  75 MHz) spectrometers at ambient temperature in  $\text{CDCl}_3$ . Chemical shifts are reported in parts per million as follows: chemical shift, multiplicity (s = singlet, d = doublet, t = triplet, q = quartet, m = multiplet, br = broad), coupling constant, and integration. Infrared spectra were recorded on a Nicolet Nexus 670 FT-IR ESP spectrophotometer. Optical rotations were recorded on an AUTOPOL III digital polarimeter at 589 nm, and were reported as  $[\alpha]_D$  (concentration). Analytical thin layer chromatography was performed using EMD 0.25 mm silica gel 60-F plates. Flash column chromatography was performed on Sorbent Technologies 60 Å silica gel. Chiral HPLC analysis was performed using an Agilent 1100 series HPLC with a diode array detector. Chiral columns include Chiralcel<sup>®</sup>OD (Chiral Technologies Inc., 24cm×4.6mm I.D.) and Chiralpak<sup>®</sup>AD-H (Chiral Technologies Inc., 25cm × 4.6 mm I.D.). High-resolution mass spectra were obtained in the Boston University Chemical Instrumentation Center using a Waters Q-TOF mass spectrometer. Low-resolution mass were performed on a MicroMass ZQ 2000 mass spectrometer. All reactions were performed under argon, in oven dried glassware with magnetic stirring. (*R*)-BINOL and (*S*)-BINOL were purchased from STREM and used without further purification. (*S*)-VAPOL, (*R*)-VAPOL, (*S*)-VANOL and (*R*)-VANOL were purchased from Aldrich and used without further purification. All other BINOL derivatives were prepared according to known literature procedure.<sup>[1]</sup> All acyl imines were synthesized according to known literature procedures.<sup>[2]</sup> Deprotection of chiral amide was done following the procedure of Pratti et. al.<sup>[3]</sup>

### General Procedure for Preparation of Di(*n*-butyl)-alkenyl- and arylboronates

A 100 mL oven-dried round bottom flask equipped with stir bar was charged with the corresponding boronic acid (2.5 mmol), *n*-butanol (10 mL), chloroform (20 mL) and flame dried MgSO<sub>4</sub> (10 g). The reaction was refluxed overnight. The drying agents were filtered off *via* celite bed and the resulting filtrate was treated with 10 mL anhydrous toluene and concentrated under reduced pressure. The residue was placed under high vacuum for 2 h to pull off the remaining butanol. The resulting dibutylboronate was used to prepare the 1.0 M toluene solution without further purification.

### General Procedure for Arylboronate Addition to Acyl Imines

A 15 mL oven-dried round bottom flask was charged with stir bar and flushed with Ar. To the flask was added acyl imine (0.25 mmol), and (*S*)-3,3'-Br<sub>2</sub>-BINOL (16.6 mg, 0.0375 mol). The flask was fitted with a septum and placed under an atmosphere of Ar. To the flask was added toluene (2.5 mL) and the mixture was stirred at 0°C. Dibutyl arylboronate (250 μL, 0.25 mmol, 1.0 M in toluene) was added drop wise to the reaction solution. The resulting reaction mixture was stirred at 0°C and allowed to warm to rt for 18h. The reaction mixture was then quenched with water (5.0 mL) and diluted with ethyl acetate (5.0 mL). The biphasic mixture was stirred at room temperature for 10 min. The organic layer was separated and the aqueous layer was extracted with ethyl acetate (2×5.0 mL). The organic layers were combined, dried over Na<sub>2</sub>SO<sub>4</sub> and filtered. The filtrate was concentrated *in vacuo* at 25 °C. The resulting residue was subjected to flash chromatography over silica gel to afford the diarylmethyl amide.

### (*R*)-*N*-((4-methoxyphenyl)phenyl)methylbenzamide ((*R*)-catalyst was used in this case.)

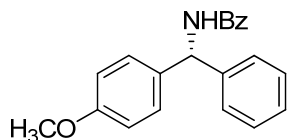

Following the general procedure, the crude mixture was purified by flash column chromatography with elution by 15-30% ethyl acetate in hexanes to afford the product as a white solid. **Yield:** 63 mg, 80%; **er:** 98:2; **[α]<sub>D</sub><sup>23</sup>** = +18.8° (c = 1.0, CHCl<sub>3</sub>); **HPLC Analysis**, *t<sub>r</sub>* minor: 9.88 min., *t<sub>r</sub>* major: 12.1 min., [Chiralcel<sup>®</sup>OD column, 24cm×4.6 mm I.D., Hexanes:IPA = 85:15, 1.0 mL/min]; **<sup>1</sup>H NMR** (400 MHz, CDCl<sub>3</sub>): δ 7.82 (d, *J* = 7.2 Hz, 2H), 7.51 (t, *J* = 7.2 Hz, 1H), 7.44 (t, *J* = 7.2 Hz, 2H), 7.35-7.28 (m, 5H), 7.21 (d, *J* = 8.4 Hz, 2H), 6.88 (d, *J* = 8.4 Hz, 2H), 6.63 (d, *J* = 7.6 Hz, 1H), 6.40 (d, *J* = 7.6 Hz, 1H), 3.80 (s, 3H); **<sup>13</sup>C NMR** (75.0 MHz, CDCl<sub>3</sub>): δ 166.4, 159.0, 141.6, 134.3, 133.6, 131.7, 128.74, 128.70, 128.6, 127.5, 127.3, 127.0, 114.1, 56.9, 55.3; **IR** (thin film, cm<sup>-1</sup>): 3301, 2925, 1634, 1510, 1488, 1248, 1176, 1030, 696; **HRMS:** calc'd for (M+Na)<sup>+</sup> C<sub>21</sub>H<sub>19</sub>NO<sub>2</sub>Na: 340.1313; found: 340.1299.

### (*S*)-*N*-((4-bromophenyl)phenyl)methylbenzamide ((*S*)-catalyst was used in this case)

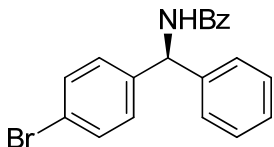

Following the general procedure, the crude mixture was purified by flash column chromatography with elution by 20% ether in hexane to afford the product as a white solid. **Yield:** mg, %; **er:** 98:2; **[α]<sub>D</sub><sup>23</sup>** = -10.3° (c=0.1, CHCl<sub>3</sub>); **HPLC Analysis**, *t<sub>r</sub>* minor: 7.1 min., *t<sub>r</sub>* major: 7.8 min., [Chiralcel<sup>®</sup>OD column, 24cm×4.6 mm I.D., Hexanes:IPA = 90:10, 1.0 mL/min]; **<sup>1</sup>H NMR** (400 MHz, CDCl<sub>3</sub>): δ 6.32 (d, *J* = 10.4Hz, 1H) δ 6.56 (d, *J* = 10.4,1H) δ 7.12 (d, *J* = 11.6Hz, 2H) δ 7.26 (m, 4H) δ 7.41 (m, 5H) δ 7.74 (d, *J* = 9.2Hz) **<sup>13</sup>C NMR** (75.0 MHz, CDCl<sub>3</sub>): δ 56.9, 121.4, 126.9, 127.5, 127.9, 128.6, 128.9, 129.0, 131.76, 131.79, 133.9, 140.4, 140.8, 166.4. **IR** (thin film, cm<sup>-1</sup>): 3299, 3015, 2925, 1634, 1529, 1486, 1011, 694. **HRMS:** calc'd for (M+Na)<sup>+</sup> C<sub>20</sub>H<sub>16</sub>NONaBr: 388.0313; found: 388.0319.

### (*R*)-*N*-((4-chlorophenyl)phenyl)methylbenzamide ((*R*)-catalyst was used in this case)

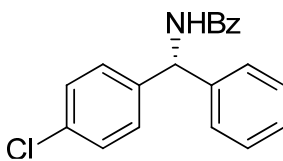

Following the general procedure, the crude mixture was purified by precipitation from toluene with hexanes, gave white solid. **Yield:** 152 mg, 94%; **er:** 98:2; **[α]<sub>D</sub><sup>23</sup>** = -20.4° (c = 1.0, CHCl<sub>3</sub>); **HPLC Analysis:** 14.09 min., *t<sub>r</sub>* minor: 12.1 min., [Chiralcel<sup>®</sup>OD column, 24cm×4.6 mm I.D., Hexanes:IPA = 90:10, 1.0 mL/min] **<sup>1</sup>H NMR** (400 MHz, CDCl<sub>3</sub>): δ 6.41 (d, *J* = 7.8Hz, 1H) δ 6.62 (d, *J* = 7.8Hz, 1H) δ 7.3 (m, 9H) δ 7.45 (m, 2H) δ 7.53 (m, 1H) δ 7.82 (d, *J* = 8.7, 2H). **<sup>13</sup>C NMR** (75.0 MHz, CDCl<sub>3</sub>): δ 56.9, 127.0, 127.5, 127.9, 128.69, 128.76, 128.87, 128.94, 131.8, 133.4, 133.9, 139.9, 140.9, 166.5. **IR** (thin film, cm<sup>-1</sup>): 1244, 1310, 1488, 1521, 1577, 1631, 2988, 3102, 3294. **HRMS:** calc'd for (M+Na)<sup>+</sup> C<sub>20</sub>H<sub>16</sub>NONaCl: 344.0818; found: 344.0800.

**(S)-N-((4-methylphenyl)phenyl)methylbenzamide**

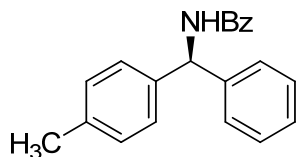

Following the general procedure, the crude mixture was purified by flash column chromatography with elution by 20% ether in hexane to afford the product as a white solid. **Yield:** 28.5 mg, 82%; **er:** 98:2;  $[\alpha]_D^{23} = -15.6^\circ$  ( $c = 0.1$ ,  $\text{CHCl}_3$ ); **HPLC Analysis**,  $t_r$  minor: 9.6 min.,  $t_r$  major: 11.1 min., [Chiralcel<sup>®</sup>OD column, 24cm×4.6 mm I.D., Hexanes:IPA = 90:10, 1.0 mL/min]; **<sup>1</sup>H NMR** (400 MHz,  $\text{CDCl}_3$ ):  $\delta$  2.34 (s, 3H)  $\delta$  6.40 (d,  $J = 7.6\text{Hz}$ , 1H)  $\delta$  6.65 (d,  $J = 7.6\text{Hz}$ , 1H)  $\delta$  7.15 (m, 4H)  $\delta$  7.29 (m, 5H)  $\delta$  7.43 (m, 3H)  $\delta$  7.80 (d,  $J = 6.8\text{Hz}$ , 2H) **<sup>13</sup>C NMR** (75.0 MHz,  $\text{CDCl}_3$ ):  $\delta$  20.5, 57.8, 126.59, 126.96, 127.01, 127.04, 128.18, 128.27, 129.00, 131.2, 133.8, 136.9, 138.1, 141.1, 166.0 **IR** (thin film,  $\text{cm}^{-1}$ ): 696, 1033, 1311, 1488, 1528, 1635, 3059, 3308. **HRMS:** calc'd for  $(\text{M}+\text{Na})^+ \text{C}_{21}\text{H}_{19}\text{NONa}$ : 324.1364 found: 324.1327.

**(S)-N-(benzo[d][1,3]dioxol-5-yl(phenyl)methyl)benzamide**

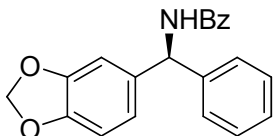

Following the general procedure, the crude mixture was purified by flash column chromatography with elution by 20% ether in hexane to afford the product as a white solid. **Yield:** 38.1 mg, 91%; **er:** 98:2;  $[\alpha]_D^{23} = -9.7^\circ$  ( $c = 0.05$ ,  $\text{CHCl}_3$ ); **HPLC Analysis**,  $t_r$  major: 36.5 min.,  $t_r$  minor: 40.1 min., [Chiralpak<sup>®</sup>AD column, 24cm×4.6 mm I.D., Hexanes:IPA = 90:10, 1.0 mL/min]; **<sup>1</sup>H NMR** (400 MHz,  $\text{CDCl}_3$ ):  $\delta$  5.93 (s, 2H)  $\delta$  6.33 (d,  $J = 7.6\text{Hz}$ , 1H)  $\delta$  6.61 (d,  $J = 7.6\text{Hz}$ , 1H)  $\delta$  6.75 (d,  $J = 5.6\text{Hz}$ , 2H)  $\delta$  6.761 (s, 1H)  $\delta$  7.32 (m, 5H)  $\delta$  7.42 (m, 3H)  $\delta$  7.80 (d,  $J = 6.8\text{Hz}$ , 2H). **<sup>13</sup>C NMR** (75.0 MHz,  $\text{CDCl}_3$ ):  $\delta$  57.2, 101.2, 108.0, 108.4, 120.8, 127.0, 127.3, 127.6, 128.6, 128.8, 131.7, 134.1, 135.4, 141.4, 146.9, 147.9, 166.4. **IR** (thin film,  $\text{cm}^{-1}$ ): 1039, 1247, 1487, 1502, 1529, 1635, 2924, 3061, 3309. **HRMS:** calc'd for  $(\text{M}+\text{Na})^+ \text{C}_{21}\text{H}_{17}\text{NO}_3\text{Na}$  354.1106 found: 354.1087

**(S)-N-((2-Bromophenyl)(phenyl)methyl)benzamide**

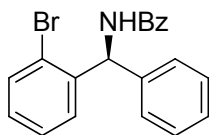

Following the general procedure, the crude mixture was purified by flash column chromatography with elution by 15-30% ethyl acetate in hexanes to afford the product as a white solid. **Yield:** 65 mg, 72%; **er:** 97:3;  $[\alpha]_D^{23} = -6.8^\circ$  ( $c = 1.0$ ,  $\text{CHCl}_3$ ); **HPLC Analysis**,  $t_r$  major: 13.7 min.,  $t_r$  minor: 16.2 min., [Chiralcel<sup>®</sup>OD column, 24cm×4.6 mm I.D., Hexanes:IPA = 85:15, 1.0 mL/min]; **<sup>1</sup>H NMR** (400 MHz,  $\text{CDCl}_3$ ):  $\delta$  7.85 (d,  $J = 7.2\text{ Hz}$ , 2H), 7.61 (dd,  $J = 7.6, 1.2\text{ Hz}$ , 1H), 7.53 (t,  $J = 7.2\text{ Hz}$ , 1H), 7.45 (t,  $J = 7.2\text{ Hz}$ , 2H), 7.39-7.29 (m, 5H), 7.20-7.18 (m, 2H), 7.11(td,  $J = 7.6, 2.0\text{ Hz}$ , 1H), 6.77 (d,  $J = 7.2\text{ Hz}$ , 1H), 6.62 (d,  $J = 7.2\text{ Hz}$ , 1H); **<sup>13</sup>C NMR** (75.0 MHz,  $\text{CDCl}_3$ ):  $\delta$  166.3, 140.1, 139.9, 134.0, 133.7, 131.8, 129.3, 129.2, 128.7, 128.6, 127.7, 127.5, 127.1, 123.9, 57.5; **IR** (thin film,  $\text{cm}^{-1}$ ): 3294, 3061, 1636, 1528, 1487, 1286, 1027, 908, 750, 695; **HRMS:** calc'd for  $(\text{M}+\text{Na})^+ \text{C}_{20}\text{H}_{16}\text{NONaBr}$ : 388.0313; found: 388.0300.

**(R)-N-((4-bromophenyl)(4-methoxyphenyl)methyl)benzamide**

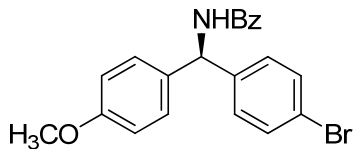

Following the general procedure, the crude mixture was purified by flash column chromatography with elution by 15-30% ethyl acetate in hexanes to afford the product as a white solid. **Yield:** 79 mg, 80%; **er:** 98.5:1.5;  $[\alpha]_D^{23} = -9^\circ$  ( $c = 1.0$ ,  $\text{CHCl}_3$ ); **HPLC Analysis**,  $t_r$  major: 8.8 min.,  $t_r$  minor: 10.4 min., [Chiralcel<sup>®</sup>OD column, 24cm×4.6 mm I.D., Hexanes:IPA = 85:15, 1.5 mL/min]; **<sup>1</sup>H NMR** (400 MHz,  $\text{CDCl}_3$ ):  $\delta$  7.78 (d,  $J = 7.2\text{ Hz}$ , 2H), 7.50 (t,  $J = 7.2\text{ Hz}$ , 1H), 7.42 (t,  $J = 7.2\text{ Hz}$ , 2H), 7.16 (d,  $J = 8.8\text{ Hz}$ , 2H), 6.86 (d,  $J = 8.8\text{ Hz}$ , 2H), 6.80 (d,  $J = 7.6\text{ Hz}$ , 1H), 6.30 (d,  $J = 7.6\text{ Hz}$ , 1H), 3.79 (s, 3H); **<sup>13</sup>C NMR** (75.0 MHz,  $\text{CDCl}_3$ ):  $\delta$  166.6, 159.2, 140.7, 134.0, 133.0, 131.8, 131.7, 129.0, 128.9, 128.6, 127.1, 121.3, 114.2, 56.5, 55.3; **IR** (thin film,  $\text{cm}^{-1}$ ): 3295, 3060, 2932, 2835, 1635, 1511, 1487, 1249, 1176, 1010, 909, 825, 731, 694; **HRMS:** calc'd for  $(\text{M}+\text{Na})^+ \text{C}_{21}\text{H}_{18}\text{NO}_2\text{NaBr}$ : 418.0419; found: 418.0393.

**(R)-N-((4-methoxyphenyl)(thiophen-2-yl)methyl)benzamide**

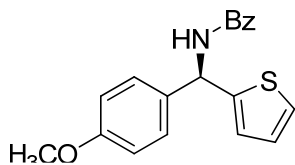

Following the general procedure, the crude mixture was purified by flash column chromatography with elution by 15-30% ethyl acetate in hexanes to afford the product as a white solid. **Yield:** 72.5 mg, 89%; **er:** 96:4;  $[\alpha]_D^{23} = +5.9^\circ$  ( $c = 1.05$ ,  $\text{CHCl}_3$ ); **HPLC Analysis**,  $t_r$  major: 7.0 min.,  $t_r$  minor: 7.8 min., [Chiralcel<sup>®</sup>OD column, 24cm×4.6 mm I.D., Hexanes:IPA = 85:15, 1.0 mL/min]; **<sup>1</sup>H NMR** (400 MHz,  $\text{CDCl}_3$ ):  $\delta$  7.80 (d,  $J = 7.2$  Hz, 2H), 7.50 (t,  $J = 7.2$  Hz, 1H), 7.40 (t,  $J = 7.2$  Hz, 2H), 7.32 (d,  $J = 7.2$  Hz, 2H), 7.24 (dd,  $J = 5.2, 1.2$  Hz, 1H), 6.95 (dd,  $J = 5.2, 3.6$  Hz, 1H), 6.90 (d,  $J = 7.2$  Hz, 2H), 7.89 (m, 2H), 6.59 (d,  $J = 8.0$  Hz, 1H), 3.80 (s, 3H); **<sup>13</sup>C NMR** (75.0 MHz,  $\text{CDCl}_3$ ):  $\delta$  166.3, 159.2, 146.1, 134.1, 133.3, 131.7, 128.6, 128.4, 127.1, 127.0, 125.8, 125.2, 114.1, 55.3, 52.9; **IR** (thin film,  $\text{cm}^{-1}$ ): 3294, 3065, 2932, 1636, 1511, 1487, 1248, 1177, 1032, 909, 831, 695; **HRMS:** calc'd for  $(\text{M}+\text{Na})^+$   $\text{C}_{19}\text{H}_{17}\text{NO}_2\text{NaS}$ : 346.0878; found: 346.0888.

**(S)-N-(cyclohexyl(4-methoxyphenyl)methyl)benzamide**

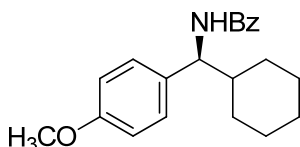

Following the general procedure, the crude mixture was purified by flash column chromatography with elution by 15-30% ethyl acetate in hexanes to afford the product as a white solid. **Yield:** 59 mg, 70%; **er:** 98:2;  $[\alpha]_D^{23} = +4.7^\circ$  ( $c = 1.0$ ,  $\text{CHCl}_3$ ); **HPLC Analysis**,  $t_r$  major: 1 min.,  $t_r$  minor: 1 min., [Chiralpak<sup>®</sup>AD column, 24cm×4.6 mm I.D., Hexanes:IPA = 95:5, 1.0 mL/min]; **<sup>1</sup>H NMR** (400 MHz,  $\text{CDCl}_3$ ):  $\delta$  7.75 (d,  $J = 8.0$  Hz, 2H), 7.50-7.41 (m, 3H), 7.21 (d,  $J = 8.4$  Hz, 2H), 6.86 (d,  $J = 8.4$  Hz, 2H), 6.38 (d,  $J = 8.0$  Hz, 1H), 4.91 (t,  $J = 8.4$  Hz, 1H), 3.78 (s, 3H), 2.01 (m, 2H), 1.78-1.48 (m, 5H), 1.27-1.11 (m, 4H); **<sup>13</sup>C NMR** (75.0 MHz,  $\text{CDCl}_3$ ):  $\delta$  166.7, 158.6, 134.9, 133.6, 131.4, 128.5, 128.1, 126.9, 123.5, 113.9, 58.3, 55.2, 43.2, 30.2, 29.7, 26.3, 26.1, 25.0; **IR** (thin film,  $\text{cm}^{-1}$ ): 3330, 2926, 1634, 1513, 1250, 1044, 693; **HRMS:** calc'd for  $(\text{M}+\text{Na})^+$   $\text{C}_{21}\text{H}_{25}\text{NO}_2\text{Na}$ : 346.1783; found: 346.1779.

**(S)-N-((4-methoxyphenyl)(phenyl)methyl)cinnamamide**

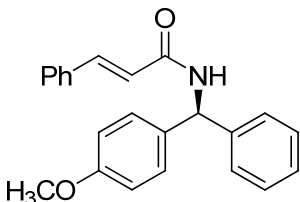

Following the general procedure, the crude mixture was purified by flash column chromatography with elution by 15-30% ethyl acetate in hexanes to afford the product as a white solid. **Yield:** 75 mg, 87%; **er:** 98:2;  $[\alpha]_D^{23} = -21^\circ$  ( $c = 0.5$ ,  $\text{CHCl}_3$ ); **HPLC Analysis**,  $t_r$  major: 25.6 min.,  $t_r$  minor: 32.4 min., [Chiralcel<sup>®</sup>OD column, 24cm×4.6 mm I.D., Hexanes:IPA = 90:10, 1.5 mL/min]; **<sup>1</sup>H NMR** (400 MHz,  $\text{CDCl}_3$ ):  $\delta$  7.64 (d,  $J = 15.6$  Hz, 1H), 7.44 (m, 2H), 7.33 – 7.27 (m, 8H), 7.16 (d,  $J = 8.8$  Hz, 2H), 6.82 (d,  $J = 8.8$  Hz, 2H), 6.64 (d,  $J = 8.0$  Hz, 1H), 6.51 (d,  $J = 15.6$  Hz, 1H), 6.33 (d,  $J = 8.0$  Hz, 1H), 3.76 (s, 3H); **<sup>13</sup>C NMR** (75.0 MHz,  $\text{CDCl}_3$ ):  $\delta$  165.1, 158.9, 141.7, 141.6, 134.8, 134.7, 129.7, 128.8, 128.6, 127.8, 127.4, 120.5, 114.0, 56.6, 55.3; **IR** (thin film,  $\text{cm}^{-1}$ ): 3269, 3060, 3028, 1654, 1615, 1511, 1352, 1248, 1217, 1176, 1032, 730, 698; **HRMS:** calc'd for  $(\text{M}+\text{Na})^+$   $\text{C}_{23}\text{H}_{21}\text{NO}_2\text{Na}$ : 366.1425; found: 366.1493.

**(2E,4E)-N-((S)-(4-methoxyphenyl)(phenyl)methyl)hexa-2,4-dienamide**

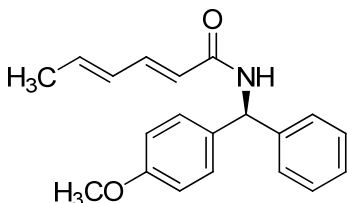

Following the general procedure, the crude mixture was purified by flash column chromatography with elution by 15-30% ethyl acetate in hexanes to afford the product as a white solid. **Yield:** 64 mg, 83%; **er:** 98:2;  $[\alpha]_D^{23} = -25^\circ$  ( $c = 0.5$ ,  $\text{CHCl}_3$ ); **HPLC Analysis**,  $t_r$  major: 7.7 min.,  $t_r$  minor: 11.3 min., [Chiralcel<sup>®</sup>OD-H column, 24cm×4.6 mm I.D., Hexanes:IPA = 85:15, 1.0 mL/min]; **<sup>1</sup>H NMR** (400 MHz,  $\text{CDCl}_3$ ):  $\delta$  7.38 (t,  $J = 7.6$  Hz, 2H), 7.34 - 7.28 (m, 4H), 7.22 (d,  $J = 6.8$  Hz, 2H), 6.91 (d,  $J = 6.8$  Hz, 2H), 6.35 (d,  $J = 8.4$  Hz, 1H), 6.25 – 6.16 (m, 3H), 5.88 (d,  $J = 16$  Hz, 1H), 3.84 (s, 3H), 1.90 (d,  $J = 7.2$  Hz, 3H); **<sup>13</sup>C NMR** (75.0 MHz,  $\text{CDCl}_3$ ):  $\delta$  165.4, 158.8, 141.9, 141.7, 138.2, 138.8, 129.6, 128.7, 128.6, 127.4, 127.3, 121.1, 114.0, 56.4, 55.3, 18.6; **IR** (thin film,  $\text{cm}^{-1}$ ): 3272, 3028, 2932, 1656, 1628, 1611, 1511, 1354, 1249, 1176, 999, 698; **HRMS:** calc'd for  $(\text{M}+\text{Na})^+$   $\text{C}_{20}\text{H}_{21}\text{NO}_2\text{Na}$ : 330.1470; found: 330.1485.

### (S)-N-((4-methoxyphenyl)(phenyl)methyl)cyclohexanecarboxamide

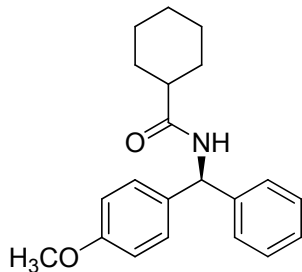

Following the general procedure, the crude mixture was purified by flash column chromatography with elution by 15-30% ethyl acetate in hexanes to afford the product as a white solid. **Yield:** 57 mg, 71%; **er:** 97.5:2.5;  $[\alpha]_D^{23} = -21.5^\circ$  ( $c = 1.0$ ,  $\text{CHCl}_3$ ); **HPLC Analysis**,  $t_r$  major: 13.4 min.,  $t_r$  minor: 15.2 min., [Chiralpak<sup>®</sup> AD-H column, 24cm $\times$ 4.6 mm I.D., Hexanes:IPA = 90:10, 1.0 mL/min]; **<sup>1</sup>H NMR** (400 MHz,  $\text{CDCl}_3$ ):  $\delta$  7.32 (t,  $J = 7.2$  Hz, 2H), 7.25 (m, 1H), 7.20 (d,  $J = 7.6$  Hz, 2H), 7.11 (d,  $J = 8.8$  Hz, 2H), 6.85 (d,  $J = 8.8$  Hz, 2H), 6.19 (d,  $J = 7.6$  Hz, 1H), 5.93 (d,  $J = 8.8$  Hz, 1H), 3.78 (s, 3H), 2.15 (m, 1H), 1.90 (d,  $J = 12.4$  Hz, 2H), 1.78 (d,  $J = 12.4$  Hz, 2H), 1.67 (m, 1H), 1.48 (m, 2H), 1.25 (m, 3H); **<sup>13</sup>C NMR** (75.0 MHz,  $\text{CDCl}_3$ ):  $\delta$  175.0, 158.8, 141.9, 134.0, 128.6, 128.5, 127.3, 127.2, 114.0, 55.9, 55.3, 45.4, 29.7, 25.7; **IR** (thin film,  $\text{cm}^{-1}$ ): 3258, 3061, 2928, 2851, 1638, 1512, 1448, 1250, 1216, 1176, 1034, 967, 821, 757; **HRMS:** calc'd for  $(\text{M}+1)^+$   $\text{C}_{21}\text{H}_{26}\text{NO}_2$ : 324.1964; found: 324.1970.

### General Procedure for Vinylboronate Addition to Acyl Imines

A 15 mL oven-dried round bottom flask was charged with stir bar and flushed with Ar. To the flask was added acyl imine (0.25 mmol), and (*S*)-3,3'-(3,5-( $\text{CH}_3$ )<sub>2</sub>- $\text{C}_6\text{H}_4$ )<sub>2</sub>-BINOL (18.6 mg, 0.0375 mol). The flask was fitted with a septum and placed under an atmosphere of Ar. To the flask was added toluene (2.5 mL) and the mixture was stirred at 0°C. (*E*)-dibutyl vinylboronate (250  $\mu\text{L}$ , 0.25 mmol, 1.0 M in toluene) was added drop wise to the reaction solution. The resulting reaction mixture was stirred at 0 °C and allowed to warm to rt over a period of 18h. The reaction mixture was then quenched with water (5.0 mL) and diluted with ether (5.0 mL). The biphasic mixture was stirred at room temperature for 10 min. The organic layer was separated and the aqueous layer was extracted with ether (2 $\times$ 5.0 mL). The organic layers were combined, dried over  $\text{Na}_2\text{SO}_4$  and filtered. The filtrate was concentrated *in vacuo* at 20 °C. The resulting residue was subjected to flash chromatography over silica gel to afford the allylic amide.

### (R,E)-N-(1,3-diphenylallyl)benzamide

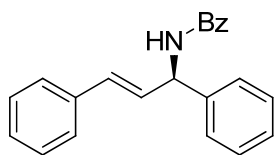

Following the general procedure, the crude mixture was purified by flash column chromatography with elution by 15-30% ethyl acetate in hexanes to afford the product as a white solid. **Yield:** 66.5 mg, 85%; **er:** 97.5:2.5;  $[\alpha]_D^{23} = 20.4^\circ$  ( $c = 1.0$ ,  $\text{CHCl}_3$ ); **HPLC Analysis**,  $t_r$  major: 15.1 min.,  $t_r$  minor: 16.7 min., [Chiralpak<sup>®</sup> AD-H column, 24cm $\times$ 4.6 mm I.D., Hexanes:IPA = 90:10, 1.5mL/min]; **<sup>1</sup>H NMR** (400 MHz,  $\text{CDCl}_3$ ):  $\delta$  7.83 (d,  $J = 8.0$  Hz, 2H), 7.52 (t,  $J = 8.0$  Hz, 1H), 7.45 (t,  $J = 8.0$  Hz, 2H), 7.43-7.22 (m, 10H), 6.62 (d,  $J = 16$  Hz, 1H), 6.55 (d,  $J = 7.6$  Hz, 1H), 6.44 (dd,  $J = 16, 6.0$  Hz, 1H), 6.02 (t,  $J = 7.6$  Hz, 1H); **<sup>13</sup>C NMR** (75.0 MHz,  $\text{CDCl}_3$ ):  $\delta$  166.7, 140.6, 136.3, 134.1, 131.9, 131.8, 128.9, 128.7, 128.6, 128.0, 127.9, 127.2, 127.0, 126.6, 126.1, 55.4; **IR** (thin film,  $\text{cm}^{-1}$ ): 3296, 2925, 1634, 1520, 1491, 1334, 1028, 852, 693; **HRMS:** calc'd for  $(\text{M}+\text{Na})^+$   $\text{C}_{22}\text{H}_{19}\text{NONa}$ : 336.1364; found: 336.1397.

### (R,E)-N-(1-phenyl-3-(thiophen-3-yl)allyl)benzamide

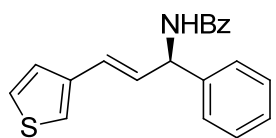

Following the general procedure, the crude mixture was purified by flash column chromatography with elution by 15-30% ethyl acetate in hexanes to afford the product as a white solid. **Yield:** 70 mg, 88%; **er:** > 99.5:0.5;  $[\alpha]_D^{23} = 10^\circ$  ( $c = 1.0$ ,  $\text{CHCl}_3$ ); **HPLC Analysis**,  $t_r$  minor: 18.4 min.,  $t_r$  major: 20.4 min., [Chiralcel<sup>®</sup> OD column, 24cm $\times$ 4.6 mm I.D., Hexanes:IPA = 85:15, 1.0 mL/min]; **<sup>1</sup>H NMR** (400 MHz,  $\text{CDCl}_3$ ):  $\delta$  7.83 (d,  $J = 7.2$  Hz, 2H), 7.51 (t,  $J = 7.2$  Hz, 1H), 7.45-7.36 (m, 7H), 7.31 (m, 1H), 7.26 (dd,  $J = 5.2, 3.2$  Hz, 1H), 7.20 (d,  $J = 5.2$  Hz, 1H), 7.14 (d,  $J = 3.2$  Hz, 1H), 6.66 (d,  $J = 8.0$  Hz, 1H), 6.60 (d,  $J = 16$  Hz, 1H), 6.30 (dd,  $J = 16, 6.4$  Hz, 1H), 5.99 (t,  $J = 6.8$  Hz, 1H); **<sup>13</sup>C NMR** (75.0 MHz,  $\text{CDCl}_3$ ):  $\delta$  166.3, 144.7, 126.2, 134.1, 132.1, 131.8, 128.7, 128.6, 128.0, 127.9, 127.2, 127.1, 126.7, 125.3, 125.2, 51.0; **IR** (thin film,  $\text{cm}^{-1}$ ): 3301, 3058, 3028, 1630, 1536, 1490, 1329, 1095, 961, 770, 700; **HRMS:** calc'd for  $(\text{M}+\text{Na})^+$   $\text{C}_{20}\text{H}_{17}\text{NONaS}$ : 342.0929; found: 342.0953.

### (R,E)-N-(3-(3-fluorophenyl)-1-phenylallyl)benzamide

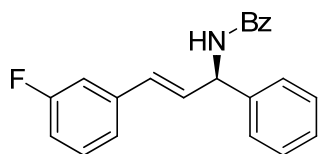

Following the general procedure, the crude mixture was purified by flash column chromatography with elution by 15-30% ethyl acetate in hexanes to afford the product as a white solid. **Yield:** 68 mg, 82%; **er:** 95.5:4.5;  $[\alpha]_D^{23} = +29^\circ$  ( $c = 1.0$ ,  $\text{CHCl}_3$ ); **HPLC Analysis**,  $t_r$  major: 13.3 min.,  $t_r$  minor: 14.6 min., [Chiralcel<sup>®</sup> OD column, 24cm $\times$ 4.6 mm

I.D., Hexanes:IPA = 85:15, 1.0 mL/min];  $^1\text{H NMR}$  (400 MHz,  $\text{CDCl}_3$ ):  $\delta$  7.83 (d,  $J$  = 8.0 Hz, 2H), 7.52 (t,  $J$  = 8.0 Hz, 1H), 7.46–7.37 (m, 6H), 7.33 (m, 1H), 7.26 (m, 1H), 7.13 (d,  $J$  = 7.6 Hz, 1H), 7.08 (d,  $J$  = 11.2 Hz, 1H), 6.95 (t,  $J$  = 8.4 Hz, 1H), 6.58 (d,  $J$  = 16 Hz, 1H), 6.57 (d,  $J$  = 8.0 Hz, 1H), 6.45 (d,  $J$  = 16, 6.0 Hz, 1H), 6.02 (t,  $J$  = 7.2 Hz, 1H);  $^{13}\text{C NMR}$  (75.0 MHz,  $\text{CDCl}_3$ ):  $\delta$  166.5, 140.4, 134.2, 131.8, 130.5, 130.2, 130.1, 129.9, 129.0, 128.7, 127.9, 127.3, 127.0, 122.6, 122.5, 114.7, 114.5, 113.1, 112.9, 55.1; **IR** (thin film,  $\text{cm}^{-1}$ ): 3300, 3028, 1635, 1581, 1530, 1489, 1215, 1144, 963, 755, 697; **HRMS**: calc'd for  $(\text{M}+\text{Na})^+$   $\text{C}_{22}\text{H}_{18}\text{NOFNa}$ : 354.1270; found: 354.1277.

#### **(*R,E*)-*N*-(3-(4-methoxyphenyl)-1-phenylallyl)benzamide**

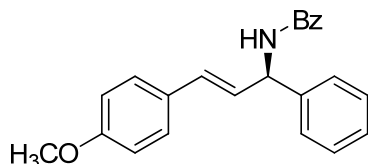

Following the general procedure, the crude mixture was purified by flash column chromatography with elution by 20-50% ethyl acetate in hexanes to afford the product as a white solid. **Yield**: 71 mg, 83%; **er**: 96:4;  $[\alpha]_{\text{D}}^{23}$  = +17.5° ( $c$  = 1.0,  $\text{CHCl}_3$ ); **HPLC Analysis**,  $t_{\text{r}}$  major: 8.3 min.,  $t_{\text{r}}$  minor: 10.1 min., [Chiralpak<sup>®</sup> AD column, 24cm×4.6 mm I.D., Hexanes:IPA = 80:20, 1.5 mL/min];  $^1\text{H NMR}$  (400 MHz,  $\text{CDCl}_3$ ):  $\delta$  7.83 (d,  $J$  = 7.2 Hz, 2H), 7.53 (t,  $J$  = 7.2 Hz, 1H), 7.46–7.38 (m, 6H), 7.32 (d,  $J$  = 8.4 Hz, 2H), 7.31 (m, 1H), 3.81 (s, 3H), 6.84 (d,  $J$  = 8.4 Hz, 2H), 6.56 (d,  $J$  = 16 Hz, 1H), 6.51 (d,  $J$  = 7.6 Hz, 1H), 6.30 (dd,  $J$  = 16, 6.0 Hz, 1H), 6.01 (t,  $J$  = 6.4 Hz, 1H), 3.70 (s, 3H);  $^{13}\text{C NMR}$  (75.0 MHz,  $\text{CDCl}_3$ ):  $\delta$  166.5, 159.4, 141.1, 134.4, 131.6, 131.3, 129.2, 128.8, 128.6, 127.8, 127.7, 127.2, 127.0, 126.5, 114.0, 55.3; **IR** (thin film,  $\text{cm}^{-1}$ ): 3301, 3030, 2835, 1634, 1606, 1510, 1489, 1250, 1175, 1030, 968, 825, 698; **HRMS**: calc'd for  $(\text{M}+\text{Na})^+$   $\text{C}_{23}\text{H}_{21}\text{NO}_2\text{Na}$ : 366.1470; found: 366.1502.

#### **(*R,E*)-*N*-(3-cyclohexyl-1-phenylallyl)benzamide**

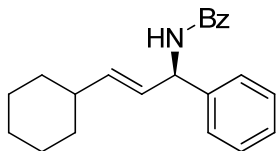

Following the general procedure, excess 2-cyclohexylvinylboronate (3 equiv.) was used. The crude mixture was purified by flash column chromatography with elution by 15-30% ethyl acetate in hexanes to afford the product as a white solid. **Yield**: 59 mg, 75%; **er**: 98:2;  $[\alpha]_{\text{D}}^{23}$  = +8.5° ( $c$  = 0.5,  $\text{CHCl}_3$ ); **HPLC Analysis**,  $t_{\text{r}}$  major: 16.4 min.,  $t_{\text{r}}$  minor: 18.0 min., [Chiralpak<sup>®</sup> AD column, 24cm×4.6 mm I.D., Hexanes:IPA = 95:5, 1.0 mL/min];  $^1\text{H NMR}$  (400 MHz,  $\text{CDCl}_3$ ):  $\delta$  7.80 (d,  $J$  = 8.0 Hz, 2H), 7.50 (t,  $J$  = 8.0 Hz, 1H), 7.43 (t,  $J$  = 8.0 Hz, 2H), 7.35 (m, 4H), 7.28 (m, 1H), 6.39 (d,  $J$  = 8.0 Hz, 1H), 5.80 (dd,  $J$  = 8.4, 4.8 Hz, 1H), 5.66 (m, 2H), 2.01 (m, 1H), 1.73 (m, 3H), 1.64 (m, 1H), 1.26 (m, 3H), 1.10 (m, 3H);  $^{13}\text{C NMR}$  (75.0 MHz,  $\text{CDCl}_3$ ):  $\delta$  166.3, 141.6, 138.9, 134.5, 131.5, 128.7, 128.6, 127.4, 127.1, 127.0, 126.5, 55.0, 40.4, 32.8, 26.1, 26.0; **IR** (thin film,  $\text{cm}^{-1}$ ): 3302, 3061, 3028, 2924, 2850, 1635, 1602, 1579, 1532, 1490, 1448, 1313, 1216, 1028, 969, 756, 697, 667; **HRMS**: calc'd for  $(\text{M}+\text{Na})^+$   $\text{C}_{22}\text{H}_{25}\text{NONa}$ : 342.1834; found: 342.1831.

#### **(*R,E*)-*N*-(1-(4-bromophenyl)-3-phenylallyl)benzamide**

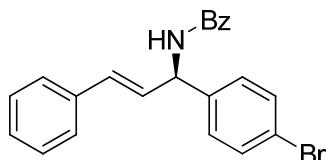

Following the general procedure, the crude mixture was purified by flash column chromatography with elution by 15-30% ethyl acetate in hexanes to afford the product as a white solid. **Yield**: 80 mg, 82%; **er**: 95.5:4.5;  $[\alpha]_{\text{D}}^{23}$  = -1.7° ( $c$  = 1.0,  $\text{CHCl}_3$ ); **HPLC Analysis**,  $t_{\text{r}}$  major: 17.0 min.,  $t_{\text{r}}$  minor: 19.4 min., [Chiralpak<sup>®</sup> AD column, 24cm×4.6 mm I.D., Hexanes:IPA = 85:15, 1.5 mL/min];  $^1\text{H NMR}$  (400 MHz,  $\text{CDCl}_3$ ):  $\delta$  7.72 (d,  $J$  = 7.6 Hz, 2H), 7.44–7.30 (m, 5H), 7.27–7.16 (m, 7H), 6.69 (d,  $J$  = 8.0 Hz, 1H), 6.47 (d,  $J$  = 15.6 Hz, 1H), 6.28 (dd,  $J$  = 16, 6.4 Hz, 1H), 5.85 (t,  $J$  = 7.2 Hz, 1H);  $^{13}\text{C NMR}$  (75.0 MHz,  $\text{CDCl}_3$ ):  $\delta$  166.6, 139.9, 136.1, 134.0, 132.4, 131.9, 131.8, 128.9, 128.6, 128.1, 127.1, 126.6, 121.6, 54.8; **IR** (thin film,  $\text{cm}^{-1}$ ): 3295, 3026, 1634, 1530, 1486, 1312, 1216, 1072, 1010, 966, 750, 692; **HRMS**: calc'd for  $(\text{M}+\text{Na})^+$   $\text{C}_{22}\text{H}_{18}\text{NOBrNa}$ : 414.0469; found: 414.0488.

#### **(*R,E*)-*N*-(3-phenyl-1-(thiophen-2-yl)allyl)benzamide**

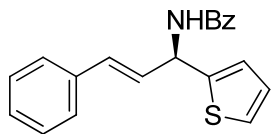

Following the general procedure, the crude mixture was purified by flash column chromatography with elution by 15-30% ethyl acetate in hexanes to afford the product as a white solid. **Yield**: 72 mg, 91%; **er**: 95:5;  $[\alpha]_{\text{D}}^{23}$  = +6.7° ( $c$  = 1.0,  $\text{CHCl}_3$ ); **HPLC Analysis**,  $t_{\text{r}}$  minor: 13.6 min.,  $t_{\text{r}}$  major: 14.8 min., [Chiralpak<sup>®</sup> AD column, 24cm×4.6 mm I.D., Hexanes:IPA = 85:15, 1.0 mL/min];  $^1\text{H NMR}$  (400 MHz,  $\text{CDCl}_3$ ):  $\delta$  7.83 (d,  $J$  = 8.0 Hz, 2H), 7.52 (t,  $J$  = 8.0 Hz, 1H), 7.44 (t,  $J$  = 8.0 Hz, 2H), 7.39 (d,  $J$  = 7.2 Hz, 2H), 7.32 (t,  $J$  = 7.2 Hz, 2H), 7.26 (m, 3H), 7.08 (d,  $J$  = 3.6 Hz, 1H), 7.01 (dd,  $J$  = 5.2, 3.6 Hz, 1H), 6.72 (d,  $J$  = 15.6 Hz, 1H), 6.65 (d,  $J$  = 8.0 Hz, 1H), 6.46 (dd,  $J$  = 15.6, 6.4 Hz, 1H), 6.27 (t,  $J$  = 7.6 Hz, 1H);  $^{13}\text{C NMR}$  (75.0 MHz,  $\text{CDCl}_3$ ):  $\delta$  166.3, 144.8, 136.2, 134.1, 132.1, 131.8, 128.7, 128.6, 128.0, 127.8, 127.2, 127.1, 126.7, 125.3,

125.2, 51.0; **IR** (thin film,  $\text{cm}^{-1}$ ): 3290, 2359, 1635, 1524, 1488, 1325, 965, 692; **HRMS**: calc'd for  $(\text{M}+\text{Na})^+$   $\text{C}_{20}\text{H}_{17}\text{NONaS}$ : 342.0929; found: 342.0911.

### (*S,E*)-*N*-(1-cyclohexyl-3-phenylallyl)benzamide

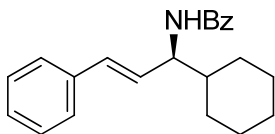

Following the general procedure, three equivalents of acyl imines were used in the styrylboronate addition reaction. The crude mixture was purified by flash column chromatography with elution by 15-30% ethyl acetate in hexanes to afford the product as a white solid. **Yield**: 56 mg, 70%; **er**: 95.5:4.5;  $[\alpha]_{\text{D}}^{23} = +16^\circ$  ( $c = 1.0$ ,  $\text{CHCl}_3$ ); **HPLC Analysis**,  $t_{\text{r}}$  major: 11.8 min.,  $t_{\text{r}}$  minor: 14.7 min., [Chiralpak<sup>®</sup>AD column, 24cm $\times$ 4.6 mm I.D., Hexanes:IPA = 90:10, 1.0 mL/min]; **<sup>1</sup>H NMR** (400 MHz,  $\text{CDCl}_3$ ):  $\delta$  7.78 (d,  $J = 8.0$  Hz, 2H), 7.52-7.22 (m, 8H), 6.58 (d,  $J = 16$  Hz, 1H), 6.18 (dd,  $J = 16, 6.0$  Hz, 1H), 6.15 (d,  $J = 6.0$  Hz, 1H), 4.70 (dd,  $J = 6.0, 3.2$  Hz, 1H), 1.93-1.62 (m, 7H), 1.35-1.06 (m, 4H); **<sup>13</sup>C NMR** (75.0 MHz,  $\text{CDCl}_3$ ):  $\delta$  166.4, 136.2, 134.4, 132.1, 131.3, 128.7, 128.6, 127.9, 127.7, 127.1, 126.5, 51.3, 41.1, 30.1, 29.5, 26.0, 25.9; **IR** (thin film,  $\text{cm}^{-1}$ ): 3327, 2928, 1623, 1576, 1515, 1448, 1347, 1073, 746, 690; **HRMS**: calc'd for  $(\text{M}+\text{Na})^+$   $\text{C}_{22}\text{H}_{25}\text{NONa}$ : 342.1834; found: 342.1873.

### *N*-((*R,E*)-1,3-diphenylallyl)cinnamamide

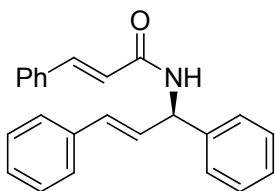

Following the general procedure, the crude mixture was purified by flash column chromatography with elution by 15-30% ethyl acetate in hexanes to afford the product as a white solid. **Yield**: 74 mg, 87%; **er**: 98.5:1.5;  $[\alpha]_{\text{D}}^{23} = +20.9^\circ$  ( $c = 1.0$ ,  $\text{CHCl}_3$ ); **HPLC Analysis**,  $t_{\text{r}}$  major: 13.1 min.,  $t_{\text{r}}$  minor: 16.5 min., [Chiralpak<sup>®</sup>AD-H column, 24cm $\times$ 4.6 mm I.D., Hexanes:IPA = 85:15, 1.5 mL/min]; **<sup>1</sup>H NMR** (400 MHz,  $\text{CDCl}_3$ ):  $\delta$  7.69 (d,  $J = 15.6$  Hz, 1H), 7.49 (m, 2H), 7.41-7.34 (m, 9H), 7.30 (t,  $J = 8.0$  Hz, 2H), 7.24 (m, 2H), 6.59 (d,  $J = 8.4$  Hz, 1H), 6.48 (d,  $J = 15.6$  Hz, 1H), 6.40 (dd,  $J = 16, 6.0$  Hz, 1H), 6.14 (d,  $J = 8.4$  Hz, 1H), 5.97 (t,  $J = 7.2$  Hz, 1H); **<sup>13</sup>C NMR** (75.0 MHz,  $\text{CDCl}_3$ ):  $\delta$  164.9, 141.8, 140.8, 136.4, 134.7, 131.5, 129.8, 128.9, 128.8, 128.7, 128.6, 127.8, 127.8, 127.3, 126.6, 120.4, 54.9; **IR** (thin film,  $\text{cm}^{-1}$ ): 3266, 3028, 2926, 1653, 1616, 1539, 1448, 1352, 1216, 967, 745, 695; **HRMS**: calc'd for  $(\text{M}+\text{Na})^+$   $\text{C}_{24}\text{H}_{21}\text{NONa}$ : 362.1521; found: 362.1555.

### (*2E,4E*)-*N*-((*R,E*)-1,3-diphenylallyl)hexa-2,4-dienamide

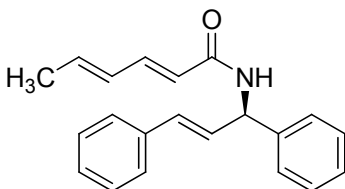

Following the general procedure, the crude mixture was purified by flash column chromatography with elution by 15-30% ethyl acetate in hexanes to afford the product as a white solid. **Yield**: 66 mg, 87%; **er**: 97.5:2.5;  $[\alpha]_{\text{D}}^{23} = -16.8^\circ$  ( $c = 0.5$ ,  $\text{CHCl}_3$ ); **HPLC Analysis**,  $t_{\text{r}}$  major: 10.4 min.,  $t_{\text{r}}$  minor: 11.7 min., [Chiralpak<sup>®</sup>AD-H column, 24cm $\times$ 4.6 mm I.D., Hexanes:IPA = 85:15, 1.5 mL/min]; **<sup>1</sup>H NMR** (400 MHz,  $\text{CDCl}_3$ ):  $\delta$  7.40-7.20 (m, 10H), 6.58 (d,  $J = 15.6$  Hz, 1H), 6.38 (dd,  $J = 15.6, 5.6$  Hz, 1H), 6.12 (m, 3H), 5.90 (m, 1H), 5.80 (d,  $J = 14.4$  Hz, 2H), 1.82 (d,  $J = 7.2$  Hz, 3H); **<sup>13</sup>C NMR** (75.0 MHz,  $\text{CDCl}_3$ ):  $\delta$  165.0, 141.7, 140.6, 138.0, 136.1, 131.1, 129.2, 128.5, 128.2, 127.4, 126.9, 126.2, 120.7, 54.4, 18.3; **IR** (thin film,  $\text{cm}^{-1}$ ): 3256, 3023, 2928, 1656, 1642, 1627, 1534, 1353, 1215, 1154, 998, 966, 755; **HRMS**: calc'd for  $(\text{M}+\text{Na})^+$   $\text{C}_{21}\text{H}_{21}\text{NONa}$ : 326.1521; found: 326.1528.

### (*R,E*)-*N*-((1,3-diphenylallyl)cyclohexanecarboxamide

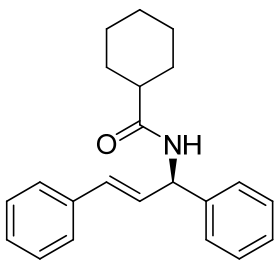

Following the general procedure, the crude mixture was purified by flash column chromatography with elution by 15-30% ethyl acetate in hexanes to afford the product as a white solid. **Yield**: 65 mg, 82%; **er**: 97.5:2.5;  $[\alpha]_{\text{D}}^{23} = -3.8^\circ$  ( $c = 0.5$ ,  $\text{CHCl}_3$ ); **HPLC Analysis**,  $t_{\text{r}}$  major: 11.9 min.,  $t_{\text{r}}$  minor: 13.0 min., [Chiralpak<sup>®</sup>AD column, 24cm $\times$ 4.6 mm I.D., Hexanes:IPA = 90:10, 1.0 mL/min]; **<sup>1</sup>H NMR** (400 MHz,  $\text{CDCl}_3$ ):  $\delta$  7.4-7.2 (m, 10H), 6.51 (d,  $J = 16$  Hz, 1H), 6.33 (dd,  $J = 16, 5.6$  Hz, 1H), 5.83 (m, 2H), 2.16 (m, 1H), 1.92 (t,  $J = 12.8$  Hz, 2H), 1.81 (m, 2H), 1.68 (m, 2H), 1.49 (m, 2H), 1.28 (m, 2H); **<sup>13</sup>C NMR** (75.0 MHz,  $\text{CDCl}_3$ ):  $\delta$  175.0, 141.0, 136.5, 131.3, 129.0, 128.8, 128.6, 127.7, 127.6, 127.1, 126.5, 54.2, 45.6, 29.7, 25.7; **IR** (thin film,  $\text{cm}^{-1}$ ): 3275, 3027, 2928, 2853, 1638, 1533, 1494, 1448, 1212, 1029, 965, 745, 695; **HRMS**: calc'd for  $(\text{M})^+$   $\text{C}_{22}\text{H}_{26}\text{NO}$ : 320.2014; found: 320.2020.



## General Procedure For Synthesis of Alkynyl Boronates

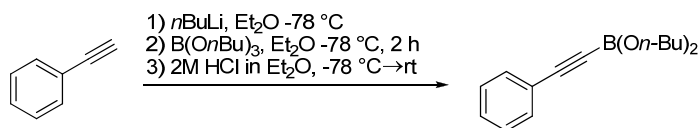

To a flask charged with argon was added 25mL diethyl ether and 1.53g phenyl acetylene (15mmol, 1eq.). Solution was cooled to  $-78\text{ }^{\circ}\text{C}$  and to it was added 9.4mL *n*BuLi (15mmol, 1.6M in hexane). Solution was allowed to stir at this temp for 20 minutes. To a second flask charged with argon was added 50mL diethyl ether and 4.05mL tri-*n*-butyl borate (15mmol). Solution was cooled to  $-78\text{ }^{\circ}\text{C}$  and to it was added *via* cannula the solution of lithium-acetylene. Reaction was allowed to stir at this temperature for 2 hours, at which point to it was added 7.5mL anhydrous HCl (2M solution in diethyl ether, 15mmol). Reaction was removed from the dryice-acetone bath and allowed to warm to rt for one hour, after which it was filtered through celite, azeotroped with toluene, concentrated *in vacuo*, and made into a 1M solution in toluene. Other variants were prepared in the same manner.

## General Procedure for Alkynylboronate Addition to Acyl Imines

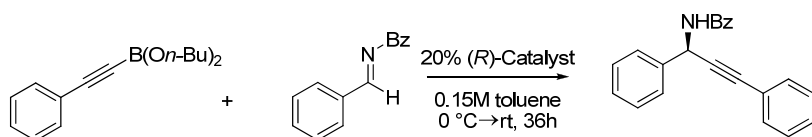

To a flask charged with argon was added appropriate imine SM (0.115mmol, 1 equiv.), 12mg catalyst ((*R*)-3,3'-Diphenyl-Dimethyl- $\text{H}_8$ -BINOL 20 mol%), and 1mL toluene. Solution was cooled to  $0\text{ }^{\circ}\text{C}$  and to it was then added 115uL boronate (1M solution in toluene, .115mmol, 1 equiv.). Reaction was allowed to stir and warm to rt on its own accord over 36 hours. Reaction was then quenched by the addition of saturated ammonium chloride (5mL). Crude material was then extracted with  $\text{CHCl}_3$  (2 X 15ml), dried over sodium sulfate, concentrated in vacuum and isolated *via* column chromatography, eluant 20% diethyl ether in hexanes. Reaction gave 35.6 mg desired product (99% yield) with an er of 96:4.

### (*R*)-N-(1-phenylnon-2-ynyl)benzamide

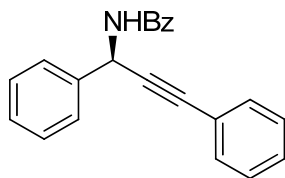

Following the general procedure, the crude mixture was purified by flash column chromatography with elution by 20% ether in hexane to yield the desired propargylic amide as a white solid. **Yield:** 35.6 mg, 99%; **er:** 96:4;  $[\alpha]_{\text{D}}^{23} = -5.7^{\circ}$  ( $c = 0.08$ ,  $\text{CHCl}_3$ ); **HPLC Analysis**,  $t_{\text{r}}$  minor: 11.2 min.,  $t_{\text{r}}$  major: 14.4 min., [Chiralpak<sup>®</sup> AD-H column, 24cm $\times$ 4.6 mm I.D., Hexanes:IPA = 90:10, 1.0 mL/min] **<sup>1</sup>H NMR** (400 MHz,  $\text{CDCl}_3$ ):  $\delta$  6.47 (d,  $J = 8.4\text{Hz}$ , 1H),  $\delta$  6.63 (d,  $J = 8.4\text{Hz}$ , 1H),  $\delta$  7.41 (m, 11H),  $\delta$  7.64 (d,  $J = 7.6\text{Hz}$ , 2H),  $\delta$  7.81 (d,  $J = 6.8\text{Hz}$ , 2H). **<sup>13</sup>C NMR** (75 MHz,  $\text{CDCl}_3$ ):  $\delta$  45.6, 85.08, 86.93, 122.4, 127.16, 128.22, 128.34, 128.64, 128.82, 131.86, 133.8, 139.01, 166.18. **IR** (thin film,  $\text{cm}^{-1}$ ): 1330.4, 1451.3, 1489.7, 1526.1, 1579.3, 1601.4, 1636.8, 3030.5, 3291.2. **HRMS:** calc'd for  $(\text{M}+\text{Na})^+$  334.1208 found: 334.1228

### (*R*)-N-(1-phenylnon-2-ynyl)benzamide

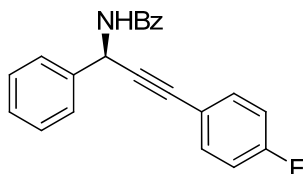

Following the general procedure, the crude mixture was purified by flash column chromatography with elution by 20% ether in hexane to yield the desired propargylic amide as a white solid. **Yield:** 29 mg, 76%; **er:** 93:7;  $[\alpha]_{\text{D}}^{23} = -25.1^{\circ}$  ( $c = 0.05$ ,  $\text{CHCl}_3$ ); **HPLC Analysis**,  $t_{\text{r}}$  minor: 12.3 min.,  $t_{\text{r}}$  major: 15.9 min., [Chiralpak<sup>®</sup> AD-H column, 24cm $\times$ 4.6 mm I.D., Hexanes:IPA = 90:10, 1.0 mL/min]. **<sup>1</sup>H NMR** (400 MHz,  $\text{CDCl}_3$ ):  $\delta$  6.40 (d,  $J = 8.4\text{Hz}$ , 1H)  $\delta$  6.57 (d,  $J = 8.4\text{Hz}$ , 1H)  $\delta$  6.95 (t,  $J = 8.4\text{Hz}$ , 17.2Hz, 2H)  $\delta$  7.30 (m, 1H),  $\delta$  7.34 (m, 2H)  $\delta$  7.45 (m, 5H)  $\delta$  7.57 (d,  $J = 7.2\text{Hz}$ , H)  $\delta$  7.75 (d,  $J = 7.2\text{Hz}$ , 2H). **<sup>13</sup>C NMR** (75 MHz,  $\text{CDCl}_3$ ):  $\delta$  29.80, 45.66, 84.07, 86.80, 115.57, 115.87, 127.24, 128.35, 128.73, 128.93, 131.96, 133.81, 133.86, 133.92, 138.97, 166.26. **IR** (thin film,  $\text{cm}^{-1}$ ): 835.3, 1231.5, 1488.9, 1525.7, 1506.7, 1635.9, 3061.5, 3290.2. **HRMS:** calc'd for  $(\text{M}+\text{Na})^+$  352.1114 found: 352.1158

### (R)-N-(1-phenylnon-2-ynyl)benzamide

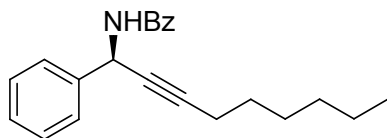

Following the general procedure, the crude mixture was purified by flash column chromatography with elution by 20% ether in hexane to yield the desired propargylic amide as a white solid. **Yield:** 31 mg, 84%; **er:** 92.5:6.5;  $[\alpha]_D^{23} = -7.4^\circ$  ( $c = 0.4$ ,  $\text{CHCl}_3$ ); **HPLC Analysis**,  $t_r$  minor: 5.2 min.,  $t_r$  major: 6.2 min., [Chiralpak<sup>®</sup>AD-H column, 24cm×4.6 mm I.D., Hexanes:IPA = 90:10, 1.0 mL/min]. **<sup>1</sup>H NMR** (400 MHz,  $\text{CDCl}_3$ ):  $\delta$  0.87 (t,  $J = 6.8\text{Hz}$ , 3H),  $\delta$  1.29 (m, 4H),  $\delta$  1.4 (m, 2H), 1.54 (m, 2H),  $\delta$  2.25 (t,  $J = 7.2\text{Hz}$ , 2H)  $\delta$  6.2 (d,  $J = 8.4\text{Hz}$ , 1H), 6.6 (d,  $J = 8.4\text{Hz}$ , 1H),  $\delta$  7.38 (m, 5H),  $\delta$  7.45 (m, 1H),  $\delta$  7.57 (d,  $J = 7.2\text{Hz}$ , 2H), 7.71 (d,  $J = 7.2\text{Hz}$ , 2H). **<sup>13</sup>C NMR** (75 MHz,  $\text{CDCl}_3$ ):  $\delta$  14.02, 18.77, 22.51, 28.55, 31.26, 45.27, 85.92, 127.06, 127.92, 128.53, 131.67, 133.92, 139.61, 166.06. **IR** (thin film,  $\text{cm}^{-1}$ ): 1325.1, 1488.4, 1519.1, 1633.8, 2855.7, 2929.3, 3301.1. **HRMS:** calc'd for  $(\text{M}+\text{Na})^+$  342.1834 found: 342.1853

### (R)-N-(4-methyl-1-phenylpent-4-en-2-ynyl)benzamide

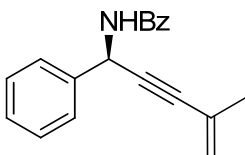

Following the general procedure, the crude mixture was purified by flash column chromatography with elution by 20% ether in hexane to yield the desired propargylic amide as a white solid. **Yield:** 25.1 mg, 80%; **er:** 96:4;  $[\alpha]_D^{23} = -6.4^\circ$  ( $c = 0.05$ ,  $\text{CHCl}_3$ ); **HPLC Analysis**,  $t_r$  major: 9.09 min.,  $t_r$  minor: 9.79 min., [Chiralpak<sup>®</sup>AD-H column, 24cm×4.6 mm I.D., Hexanes:IPA = 90:10, 1.0 mL/min]. **<sup>1</sup>H NMR** (400 MHz,  $\text{CDCl}_3$ ):  $\delta$  1.92 (s, 3H),  $\delta$  6.36 (d,  $J = 8.8\text{Hz}$ , 1H)  $\delta$  6.59 (d,  $J = 8.4\text{Hz}$ , 1H),  $\delta$  7.40 (m, 5H)  $\delta$  7.50 (m, 1H),  $\delta$  7.58 (d,  $J = 9.6\text{Hz}$ , 2H),  $\delta$  7.78 (d,  $J = 9.6\text{Hz}$ , 2H). **<sup>13</sup>C NMR** (75 MHz,  $\text{CDCl}_3$ ):  $\delta$  23.337, 45.41, 85.83, 86.21, 122.69, 127.09, 128.10, 128.58, 128.72, 131.78, 133.81, 139.05, 166.06. **IR** (thin film,  $\text{cm}^{-1}$ ): 1290.4, 1489.1, 1526.4, 1637.2, 2920.3, 3061.8, 3291.2. **HRMS:** calc'd for  $(\text{M}+\text{Na})^+$  276.1388 found: 276.1380

### (R)-N-(1,5-diphenylpent-2-ynyl)benzamide

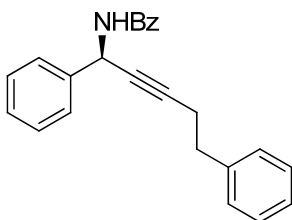

Following the general procedure, the crude mixture was purified by flash column chromatography with elution by 20% ether in hexane to yield the desired propargylic amide as a white solid. **Yield:** 27.5 mg, 71%; **er:** 96.5:3.5;  $[\alpha]_D^{23} = -18.6^\circ$  ( $c = 0.09$ ,  $\text{CHCl}_3$ ); **HPLC Analysis**,  $t_r$  minor: 18.3 min.,  $t_r$  major: 19.4 min., [Chiralpak<sup>®</sup>AD-H column, 24cm×4.6 mm I.D., Hexanes:IPA = 90:10, 1.0 mL/min]. **<sup>1</sup>H NMR** (400 MHz,  $\text{CDCl}_3$ ):  $\delta$  2.59 (t,  $J = 7.2\text{Hz}$ , 14.8Hz, 2H)  $\delta$  2.872 (t,  $J = 7.2\text{Hz}$ , 14.8Hz, 2H)  $\delta$  6.17 (d,  $J = 8.4\text{Hz}$ , 1H)  $\delta$  6.44 (d,  $J = 8.4$ , 1H)  $\delta$  7.29 (m, 8H)  $\delta$  7.48 (m, 5H)  $\delta$  7.77 (d,  $J = 7.2\text{Hz}$ , 2H). **<sup>13</sup>C NMR** (75 MHz,  $\text{CDCl}_3$ ):  $\delta$  20.87, 34.77, 45.22, 78.77, 84.89, 126.27, 127.03, 127.063, 127.90, 128.32, 128.51, 128.56, 128.68, 131.67, 133.84, 139.29, 140.43, 166.01. **IR** (thin film,  $\text{cm}^{-1}$ ): 1330.3, 1489.1, 1526.6, 1636.2, 2927.6, 3028.3, 3060.7, 3292.7. **HRMS:** calc'd for  $(\text{M}+\text{Na})^+$  362.1521 found: 362.1494

### (R)-N-(1-phenyl-3-(thiophen-3-yl)prop-2-ynyl)benzamide

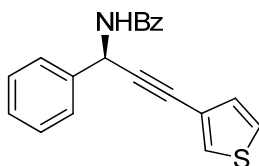

Following the general procedure, the crude mixture was purified by flash column chromatography with elution by 20% ether in hexane to yield the desired propargylic amide as a white solid. **Yield:** 26 mg, 72%; **er:** 96:4;  $[\alpha]_D^{23} = -12.8^\circ$  ( $c = 0.08$ ,  $\text{CHCl}_3$ ); **HPLC Analysis**,  $t_r$  minor: 15.2 min.,  $t_r$  major: 20.6 min., [Chiralpak<sup>®</sup>AD-H column, 24cm×4.6 mm I.D., Hexanes:IPA = 90:10, 1.0 mL/min] **<sup>1</sup>H NMR** (400 MHz,  $\text{CDCl}_3$ ):  $\delta$  6.4 (d,  $J = 8.4\text{Hz}$ , 1H),  $\delta$  6.58 (d,  $J = 8.4\text{Hz}$ , 1H),  $\delta$  7.09 (m, 1H),  $\delta$  7.21 (m, 1H),  $\delta$  7.27 (s, 1H),  $\delta$  7.35 (m, 4H),  $\delta$  7.45 (m, 2H),  $\delta$  7.57 (d,  $J = 7.6\text{Hz}$ , 2H),  $\delta$  7.75 (d,  $J = 6.8\text{Hz}$ , 2H). **<sup>13</sup>C NMR** (75 MHz,  $\text{CDCl}_3$ ):  $\delta$  45.51, 80.09, 86.46, 125.26, 127.02, 128.06, 128.47, 128.65, 129.20, 129.79, 131.69, 133.65, 138.82, 166.03. **IR** (thin film,  $\text{cm}^{-1}$ ): 782.4, 1051.9, 1327.9, 1488.2, 1524.9, 1636.9, 3060.5, 3106.2, 3285.4. **HRMS:** calc'd for  $(\text{M}+\text{Na})^+$  318.0953 found: 318.0948

### (R)-N-(1-(4-methoxyphenyl)-3-phenylprop-2-ynyl)benzamide

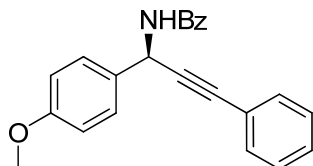

Following the general procedure, the crude mixture was purified by flash column chromatography with elution by 20% ether in hexane to yield the desired propargylic amide as a white solid. **Yield:** 38.7 mg, 99%; **er:** 96:4;  $[\alpha]_D^{23} = -10.9^\circ$  ( $c = 0.06$ ,

CHCl<sub>3</sub>); **HPLC Analysis**,  $t_r$  minor: 19.9 min.,  $t_r$  major: 24.6 min., [Chiralpak<sup>®</sup>AD-H column, 24cm×4.6 mm I.D., Hexanes:IPA = 90:10, 1.0 mL/min. <sup>1</sup>H NMR (300 MHz, CDCl<sub>3</sub>): δ 3.73 (s, 3H) δ 6.34 (d,  $J$  = 8.4Hz, 1H) δ 6.59 (d,  $J$  = 8.4Hz, 1H) δ 6.84 (d,  $J$  = 9Hz, 2H) δ 7.25 (m, 3H) δ 7.39 (m, 5H) δ 7.50 (d,  $J$  = 9Hz, 2H) δ 7.74 (d,  $J$  = 7.2Hz, 2H) <sup>13</sup>C NMR (75 MHz, CDCl<sub>3</sub>): δ 44.95, 55.20, 84.72, 87.05, 113.95, 126.97, 127.01, 128.19, 128.33, 128.36, 128.41, 128.45, 128.49, 131.68, 131.71, 133.74, 159.34, 165.94. **IR** (thin film, cm<sup>-1</sup>): 1174.0, 1249.3, 1488.8, 1510.5, 1634.8, 2834.6, 2953.9, 3058.9, 3277.7. **HRMS**: calc'd for (M+Na)<sup>+</sup> 364.1313 found: 364.1350

#### (R)-4-bromo-N-(1,3-diphenylprop-2-ynyl)benzamide

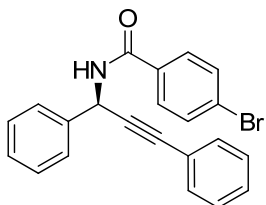

Following the general procedure, the crude mixture was purified by flash column chromatography with elution by 20% ether in hexane to yield the desired propargylic amide as a white solid. **Yield**: 27.5 mg, 70%; **er**: 97:3 [ $\alpha$ ]<sub>D</sub><sup>23</sup> = -10.6° (c = 0.07, CHCl<sub>3</sub>); **HPLC Analysis**,  $t_r$  minor: 6.1 min.,  $t_r$  major: 13.6 min., [Chiralpak<sup>®</sup>AD-H column, 24cm×4.6 mm I.D., Hexanes:IPA = 90:10, 1.0 mL/min] <sup>1</sup>H NMR (300 MHz, CDCl<sub>3</sub>): δ 6.38 (d,  $J$  = 8.4Hz, 1H) δ 6.60 (d,  $J$  = 8.4Hz, 1H) δ 7.36 – 7.19 (m, 6H) δ 7.42 (dd,  $J$  = 2, 6.8Hz, 2H) δ 7.50 (d,  $J$  = 8.4Hz, 2H) δ 7.55 (d,  $J$  = 7.2Hz, 2H) δ 7.62 (d,  $J$  = 8.4Hz, 2H). <sup>13</sup>C NMR (75 MHz, CDCl<sub>3</sub>): δ 45.8, 85.3, 86.7, 122.4, 126.6, 127.2, 128.37, 128.41, 128.74, 128.82, 128.90, 131.90, 131.92, 132.7, 138.9, 165.3. **IR** (thin film, cm<sup>-1</sup>): 841.7, 1144.3, 1481.4, 1526.3, 1636.1, 2924.2, 3287.0. **HRMS**: calc'd for (M+Na)<sup>+</sup> C<sub>22</sub>H<sub>16</sub>BrNONa 390.0494 found: 390.0474

#### (R)-N-(1,3-diphenylprop-2-ynyl)-4-methoxybenzamide

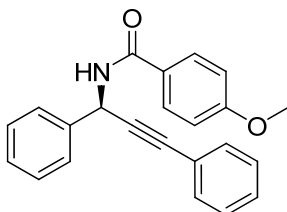

Following the general procedure, the crude mixture was purified by flash column chromatography with elution by 20% ether in hexane to yield the desired propargylic amide as a white solid. **Yield**: 31.5 mg, 80%; **er**: 93:7; [ $\alpha$ ]<sub>D</sub><sup>23</sup> = -7.3° (c = 0.9, CHCl<sub>3</sub>); **HPLC Analysis**,  $t_r$  minor: 11.0 min.,  $t_r$  major: 13.0 min., [Chiralpak<sup>®</sup>AD-H column, 24cm×4.6 mm I.D., Hexanes:IPA = 85:15, 1.0 mL/min] <sup>1</sup>H NMR (400 MHz, CDCl<sub>3</sub>): δ 3.82 (s, 3H), δ 6.46 (d,  $J$  = 8.4Hz, 1H), δ 6.58 (d,  $J$  = 8.4Hz, 1H), δ 6.91 (d,  $J$  = 8.8Hz, 2H), δ 7.316 (m, 4H), δ 7.379 (t,  $J$  = 7.2Hz, 14.8Hz, 2H), δ 7.47 (m, 2H), δ 7.63 (d,  $J$  = 7.2Hz, 2H), δ 7.77 (m, 2H). <sup>13</sup>C NMR (75 MHz, CDCl<sub>3</sub>): δ 45.72, 55.67, 85.19, 87.37, 114.02, 122.70, 126.25, 127.43, 128.38, 128.56, 128.82, 129.01, 129.26, 132.08, 139.43, 162.67, 165.92. **IR** (thin film, cm<sup>-1</sup>): 1177.3, 1254.9, 1501.0, 1532, 1606.4, 1633.5, 2932.0, 3293.5. **HRMS**: calc'd for (M+Na)<sup>+</sup> 364.1313 found: 364.1342

#### (R)-N-(1-(4-bromophenyl)-3-phenylprop-2-ynyl)benzamide

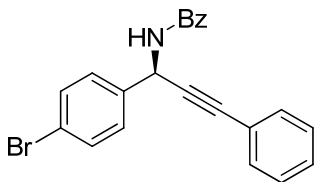

Following the general procedure, the crude mixture was purified by flash column chromatography with elution by 20% ether in hexane to yield the desired propargylic amide as a white solid. **Yield**: 28 mg, 63%; **er**: 93:7; [ $\alpha$ ]<sub>D</sub><sup>23</sup> = -10.6° (c = 0.07, CHCl<sub>3</sub>); **HPLC Analysis**,  $t_r$  minor: 11.1 min.,  $t_r$  major: 14.3 min., [Chiralpak<sup>®</sup>AD-H column, 24cm×4.6 mm I.D., Hexanes:IPA = 90:10, 1.0 mL/min] <sup>1</sup>H NMR (400 MHz, CDCl<sub>3</sub>): δ 6.41 (d,  $J$  = 8.4Hz, 1H) δ 6.65 (d,  $J$  = 8.4Hz, 1H) δ 7.33 (m, 3H) δ 7.45 (m, 9H) δ 7.79 (d,  $J$  = 7.2Hz, 2H). <sup>13</sup>C NMR (75 MHz, CDCl<sub>3</sub>): δ 45.1, 85.4, 86.2, 122.0, 122.1, 127.1, 128.3, 128.6, 128.7, 128.9, 131.8, 131.9, 133.5, 138.2, 166.2. **IR** (thin film, cm<sup>-1</sup>): 1335.7, 1442.8, 1486.3, 1521.0, 1634.9, 2854.9, 2924.0, 3281.2. **HRMS**: calc'd for (M+Na)<sup>+</sup> 412.0313 found: 412.0273

#### (S)-N-(3-phenyl-1-(thiophen-2-yl)prop-2-ynyl)benzamide

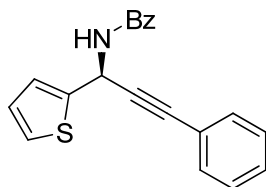

Following the general procedure, the crude mixture was purified by flash column chromatography with elution by 20% ether in hexane to yield the desired propargylic amide as a white solid. **Yield**: 29.1 mg, 80%; **er**: 97:3; [ $\alpha$ ]<sub>D</sub><sup>23</sup> = -13.1° (c = 0.1, CHCl<sub>3</sub>); **HPLC Analysis**,  $t_r$  minor: 12.6 min.,  $t_r$  major: 13.5 min., [Chiralpak<sup>®</sup>AD-H column, 24cm×4.6 mm I.D., Hexanes:IPA = 90:10, 1.0 mL/min] <sup>1</sup>H NMR (400 MHz, CDCl<sub>3</sub>): δ 6.64 (d,  $J$  = 8.4Hz, 1H), δ 6.70 (d,  $J$  = 8.4Hz, 1H), δ 6.99 (q,  $J$  = 3.6Hz, 1.6Hz, 1H), δ 7.27 (dd,  $J$  = 5.2Hz, 1.6Hz, 1H), δ 7.29 (m, 1H), δ 7.33 (m, 3H), δ 7.47 (m, 5H), δ 7.81 (d,  $J$  = 7.2Hz, 2H). <sup>13</sup>C NMR (75 MHz, CDCl<sub>3</sub>): δ 41.4, 84.3, 86.3, 122.0, 125.6, 126.0, 126.8, 127.1, 128.3, 128.6, 128.7, 131.8, 131.9, 133.5, 142.8, 165.9. **IR** (thin film, cm<sup>-1</sup>): 1330.9, 1442.4, 1488.2, 1519.3, 1637.6, 2924.9, 3278.7. **HRMS**: calc'd for (M+Na)<sup>+</sup> 340.0772 found: 340.0796

## Absolute Stereochemistry Determination for Arylboronate Addition and Formal Synthesis of Levocetirizine

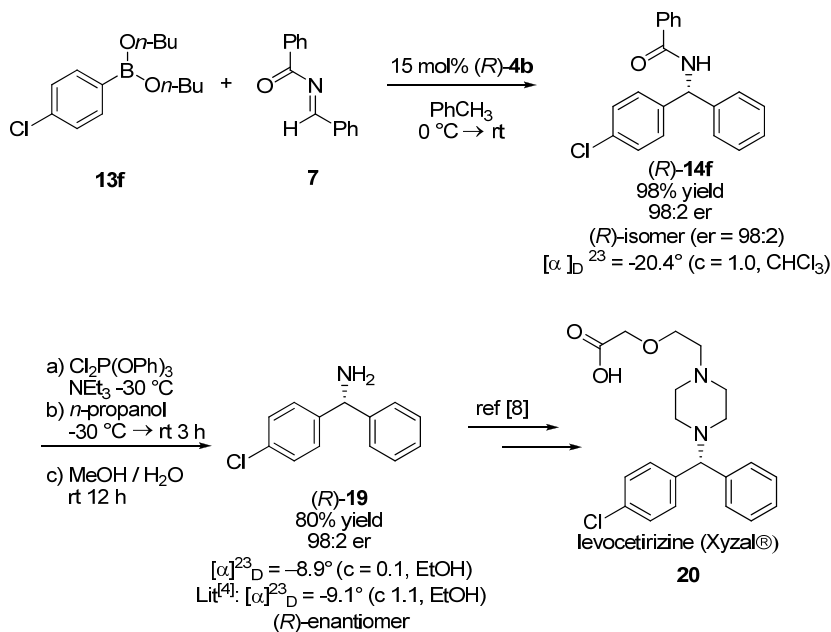

A flame dried 50mL round bottom flask was charged with argon and to it was added 15mL dry  $\text{CHCl}_3$  and 1.5mL  $\text{P(OPh)}_3$  (5.75mmol, 3.7 equiv). Solution was cooled to  $-30^\circ\text{C}$  and  $\text{Cl}_2$  gas was then bubbled through until a bright yellow color appeared.  $\text{P(OPh)}_3$  was then titrated into the solution at  $-30^\circ\text{C}$  until the yellow color disapated to almost colorless (apprx 250uL). To this reaction was then added via cannula a solution of 500mg chiral amide  $(R)\text{-}21$  (98:2er, 1.55mmol, 1equiv) in 5mL  $\text{CHCl}_3$  followed immediately by 1.2mL triethylamine (8.9mmol, 5.7 equiv). Reaction was allowed to stir at this temperature for 3 hours, to it was then added 15 equiv of anhydrous *n*-propanol (35mL). Reaction was then allowed to warm to rt on its own accord over 3

hours. After this time solvent was removed under vacuum and material was taken up in a 1:1 mixture of water and methanol. This heterogeneous mixture was allowed to stir at rt for 12 hours. After stirring, the top portion was decanted, leaving behind the insoluble material. The organic phase was then acidified with 40mL 3M HCl and extracted with ether (2 X 30mL). The aqueous layer was then basified with 50mL 3M NaOH and extracted with ether again (2 X 30mL). The two organic portions were then collected, dried over sodium sulfate, filtered and solvent removed under reduced pressure. Crude material was then put on a column and eluted with 2% to 10 % MeOH in  $\text{CHCl}_3$  to give the desired free amine in 80% yield (271mg, 1.25mmol). The optical rotation along with other analytical data matched previous reports.<sup>[4]</sup> HPLC analysis of the free amine was not done as previous reports have shown that re-acylating the amine can be done without racemizing of the chiral center.<sup>[4]</sup>

## Absolute Stereochemistry Determination for Alkenylboronate Addition

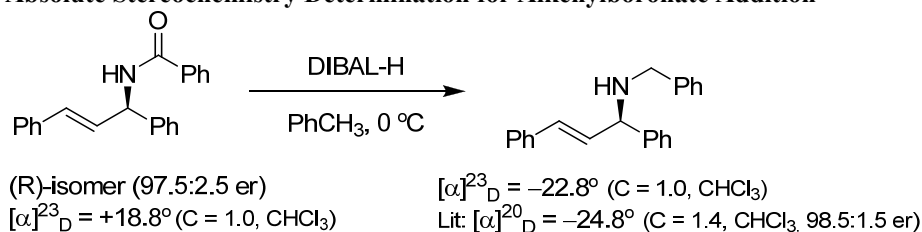

A 25 mL flame-dried round bottom flask was equipped with stir bar and flushed with Ar. Allylic benzamide (62 mg, 0.20 mmol) was added and dissolved in  $\text{CH}_2\text{Cl}_2$  ( 2.0 mL). The solution was cooled to  $0^\circ\text{C}$ . Diisobutylaluminum hydride (1.0 mL, 1.0 mmol, 1 M in toluene) was added drop wise. The reaction was slowly warmed up to room temperature and stirred for 3 h. The reaction mixture was quenched with water (5.0 mL) and extracted with  $\text{CH}_2\text{Cl}_2$  (5 mL $\times$ 2). The organic layers were combined, dried over  $\text{Na}_2\text{SO}_4$  and concentrated under reduced pressure. The residue was purified by flash chromatography over silica gel (elution with 5-20% ethyl acetate in hexanes) to afford the desired homoallylic benzylamine as a waxy compound (54mg, 91% yield) with  $[\alpha]_D^{23} = -22.8^\circ (c = 0.5, \text{CHCl}_3)$ . Lit<sup>[5]</sup>:  $[\alpha]_D^{20} = -24.8^\circ (c = 1.4, \text{CHCl}_3, 98.5:1.5 \text{ er})$ .

## Absolute Stereochemistry Determination for alkynylboronate Addition

Absolute stereochemistry of the propargyl amides was done by comparison of known literature values to observed values.

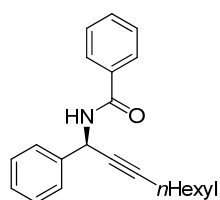

$(R)$  enantiomer:  $[\alpha]_D^{23} = -15.3 (c = 0.07) \text{CHCl}_3$ 
  
 $(S)$  enantiomer lit<sup>[6]</sup>:  $[\alpha]_D^{23} = +8.9 (c = 0.9) \text{CHCl}_3$

Alkyl substituted propargyl amide has a reported value of  $[\alpha]_D^{23} = +8.9 (c = 0.9 \text{ CHCl}_3, \text{er} = 90:10)$  for the *S*-enantiomer.<sup>[6]</sup> Our propargyl amide (Table 3, entry 2) was observed to have a value  $[\alpha]_D^{23} = -15.3 (c = 0.07 \text{ CHCl}_3, \text{er} = 92:8)$  and was assigned as the *(R)*-enantiomer. This is congruent with our illustrated transition state as our theory for stereochemical outcome shows that the *(R)* catalyst will give the *(R)* enantiomer product.

### Direct Injection MS studies of ligand exchange; Boronate and Diol.

To a flask charged with argon was added 2.5mL toluene- $d_8$ , 250uL vinyl boronate solution (0.25mmol, 1equiv, 1M) in toluene, and 22mg catalyst (0.038mmol, 0.15 equiv). Thirty microlitres of this solution was then diluted with 500uL acetonitrile and directly injected into our MicroMass ZQ 2000 mass spectrometer in negative electron spray ionization mode (ES/voltages : capillary 3.01 KV, cone ramped from 10 to 80 V; Temperature: source 130 °C, desolvation 260 °C; gas flow : desolvation 250L/h, cone 50 L/h; pumpflow 150uL/min). The spectrum observed is illustrated below in Figure 1.

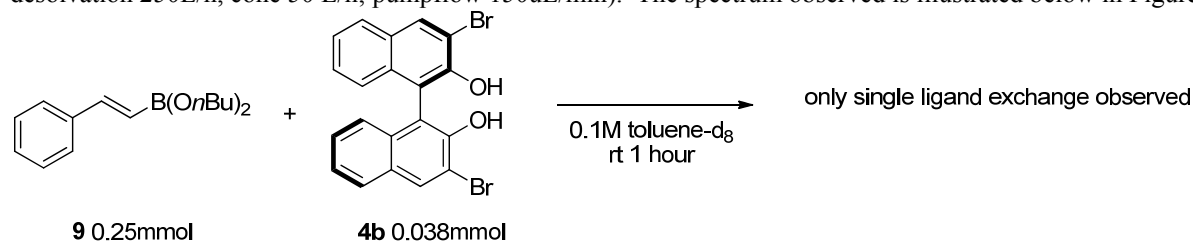

**Figure 1. Direct Injection MS Study of 3,3'-Br<sub>2</sub>-BINOL and Vinyl Boronate.**

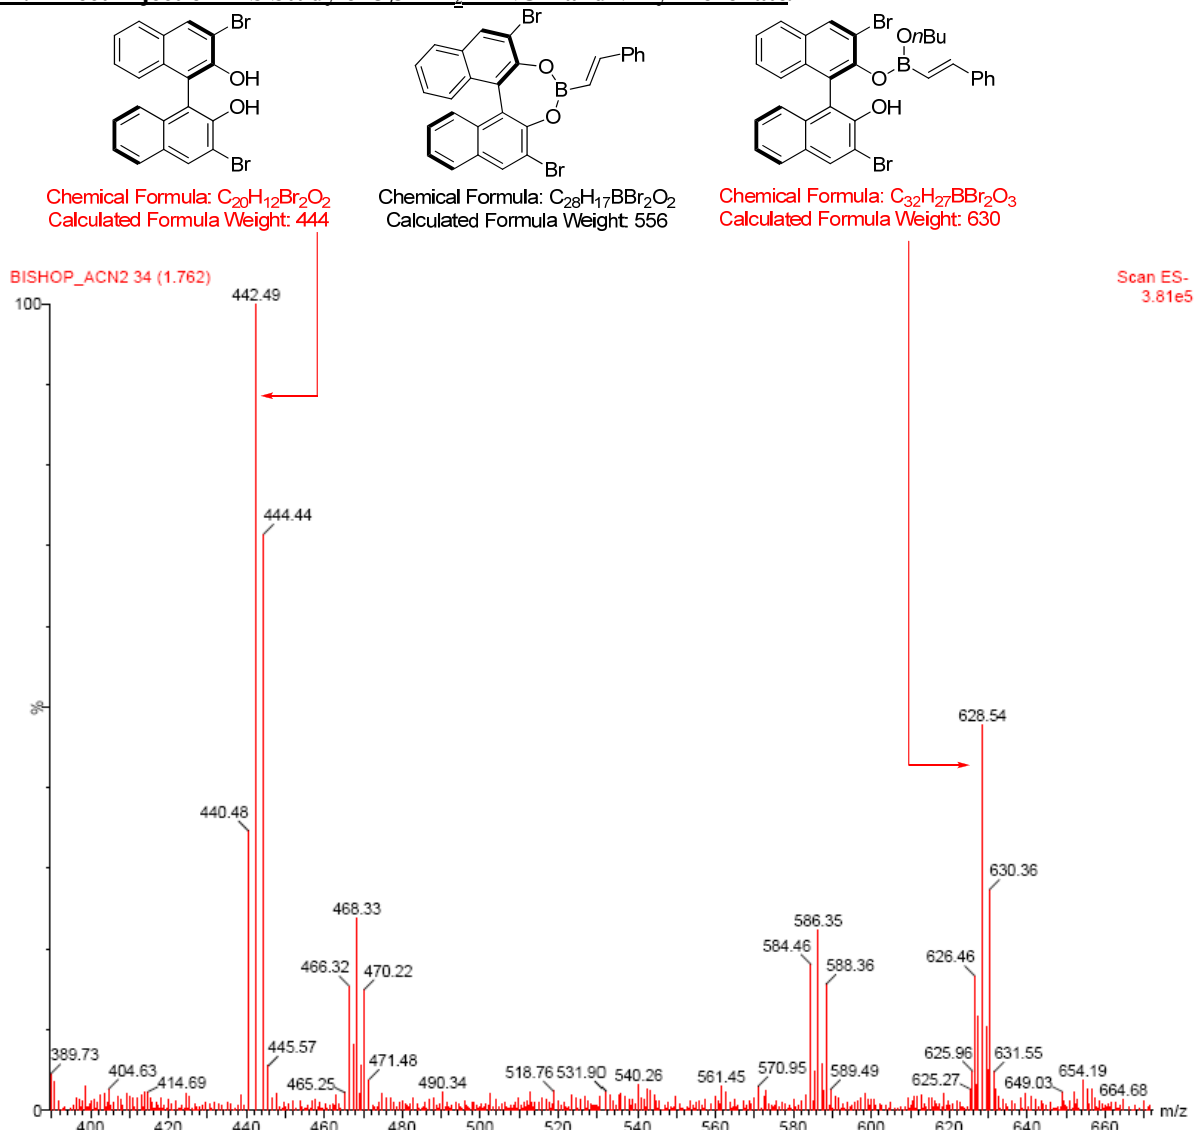

We found that direct injection MS studies are the preferred process for explicating the most likely mechanistic pathway of this addition reaction. Illustrated above in Figure 1 is the spectrum generated from the reaction between a catalytic amount of chiral diol **4b** and 1 equivalent vinyl boronate **9**. The observed results depict a lone acyclic product of the single ligand exchange pathway (Calculated formula weight: **630**, observed: **628.54**). No amount of the cyclic product generated by a dual ligand exchange pathway is observed (Calculated formula weight: **556**). The data generated here, as well as in a previous report,<sup>[2]</sup> leads us to the conclusion that the single ligand exchange species is the active nucleophile.

## Direct Injection MS studies of vinyl boronate addition reaction.

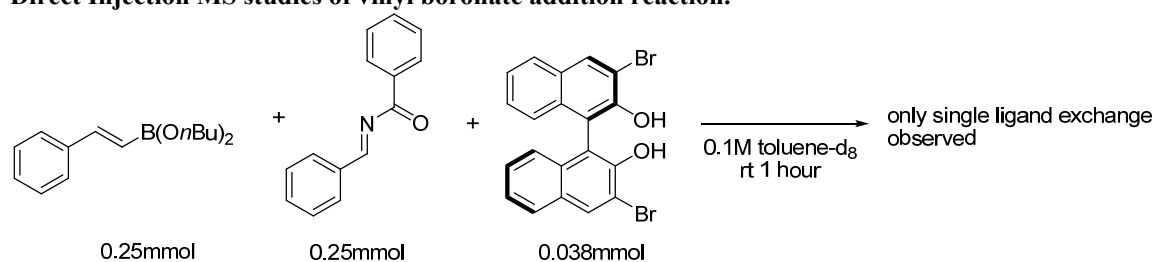

To the same reaction vessel described above was then added 52mg imine (0.25mmol, 1 equiv) and was allowed to stir at rt 1 hour. Thirty microlitres of this solution was then diluted with 500uL acetonitrile. 150uL of this solution was then directly injected into our MicroMass ZQ 2000 mass spectrometer in positive electron spray ionization mode (ES/voltages : capillary 3.01 KV, cone ramped from 10 to 80 V; Temperature: source 130 °C, desolvation 260 °C; gas flow : desolvation 250L/h, cone 50 L/h; pumpflow 150uL/min). The spectrum observed is illustrated below in Figure 2.

**Figure 2. Direct Injection MS Study of Ligand Exchange/Vinyl Boronate Addition Process.**

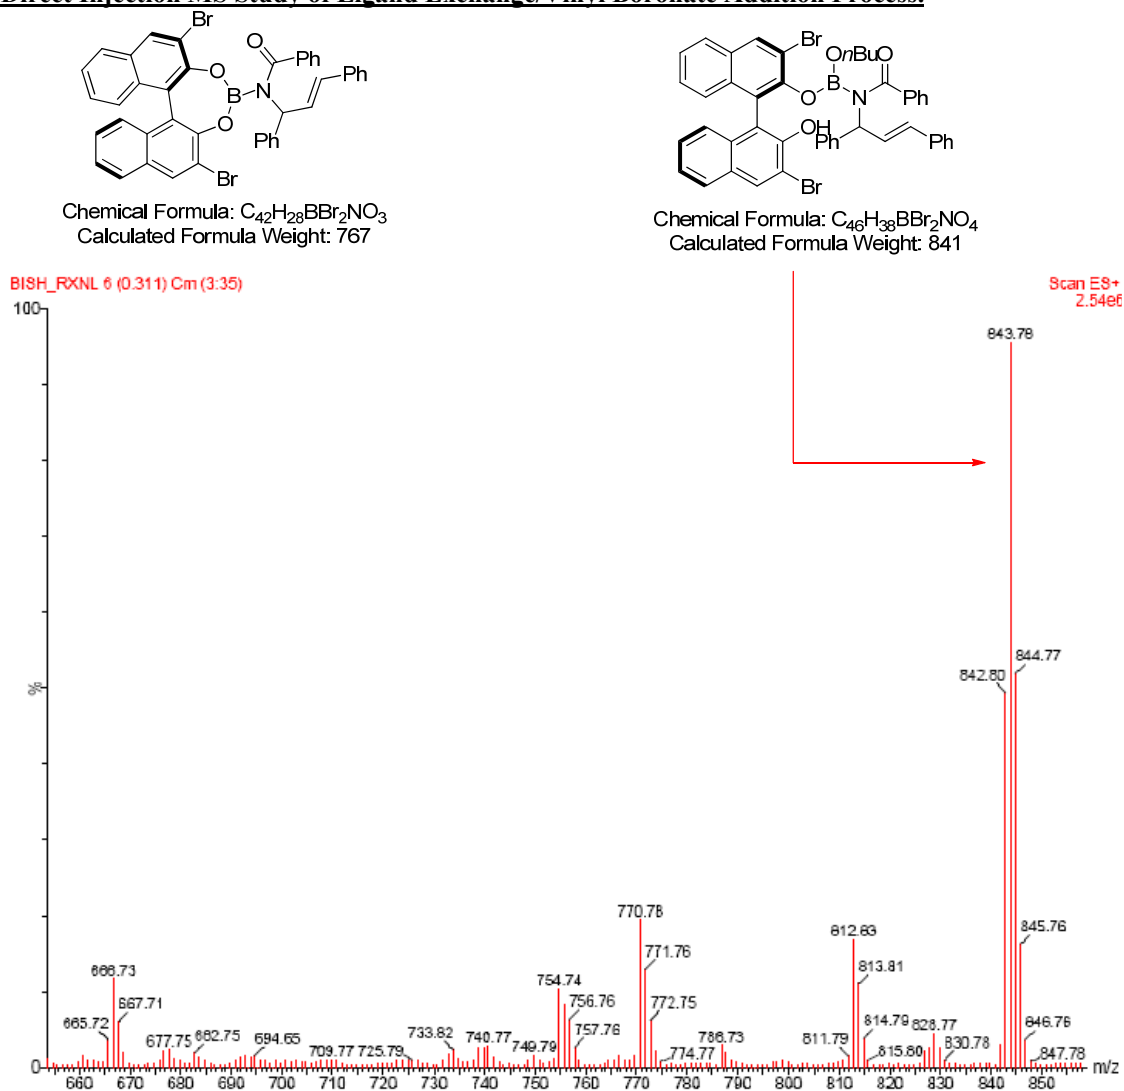

Further evidence to support our hypothesis is produced when performing the same ESI-MS analysis on the reaction mixture. Illustrated in Figure 2 above is the spectrum of a solution consisting of vinyl boronate **9**, chiral diol **4b** and imine **7**. The resting state of the catalytic cycle as the single ligand exchange species **21** is observed (Calculated formula weight: **841**, observed: **843.79**). Again, no cyclic dual ligand exchange species is detected (Calculated formula weight: **767**). This result also strengthens our hypothesis that the boron is activated by the nitrogen of the imine before the addition occurs. Activation of boron in this manner is not a novel concept as Corey<sup>[7]</sup> has shown this type of reactivity in the past. These results lead us to believe that the active catalytic species is the single ligand exchange intermediate.

## HPLC Analysis of Chiral Aryl Amide Products

Table 1, entry 1: Chiralcel® OD-H column, 24cm×4.6 mm I.D., Hexanes:IPA = 85:15, 1.0 mL/min.

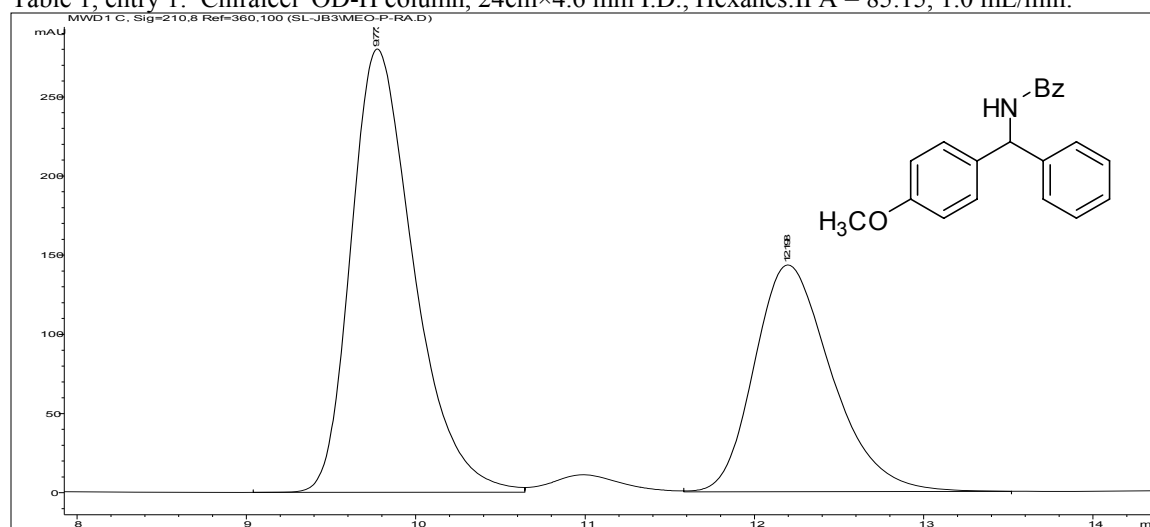

Signal 3: MWD1 C, Sig=210,8 Ref=360,100

| Peak #   | RetTime [min] | Type | Width [min] | Area [mAU*s] | Height [mAU] | Area %  |
|----------|---------------|------|-------------|--------------|--------------|---------|
| 1        | 9.773         | VV   | 0.3944      | 7208.23828   | 279.91806    | 61.3750 |
| 2        | 12.198        | VB   | 0.4856      | 4536.34570   | 143.19022    | 38.6250 |
| Totals : |               |      |             | 1.17446e4    | 423.10828    |         |

(R)-Catalyst was used.

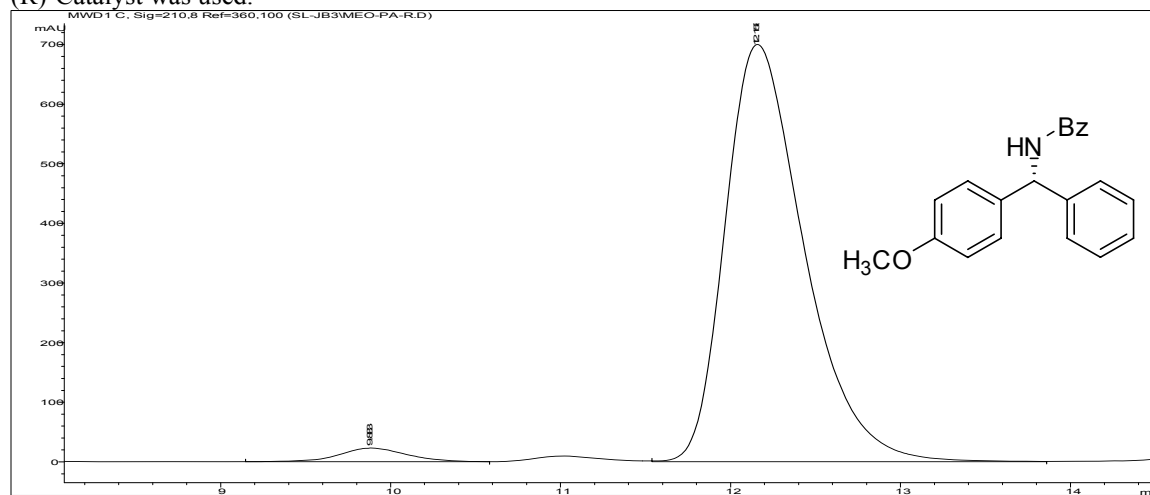

Signal 3: MWD1 C, Sig=210,8 Ref=360,100

| Peak #   | RetTime [min] | Type | Width [min] | Area [mAU*s] | Height [mAU] | Area %  |
|----------|---------------|------|-------------|--------------|--------------|---------|
| 1        | 9.883         | BV   | 0.4167      | 623.95898    | 22.70119     | 2.6905  |
| 2        | 12.158        | VB   | 0.4941      | 2.25671e4    | 700.02368    | 97.3095 |
| Totals : |               |      |             | 2.31910e4    | 722.72487    |         |

Table 1, Entry 2

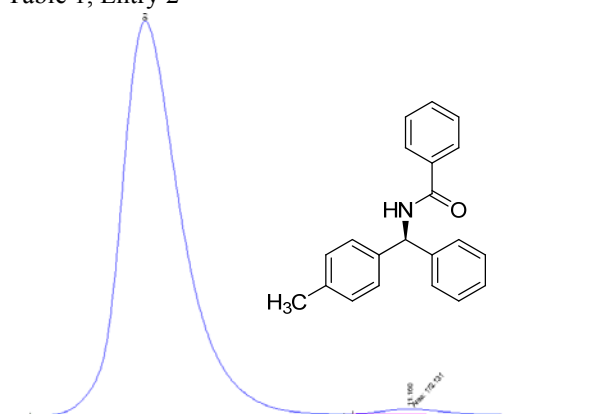

4-ch3 aryl add  
 cat add to parent imine  
 10% ipa hexane  
 chiral cel od col

| Peak # | RetTime [min] | Type | Width [min] | Area [mAU*s] | Height [mAU] | Area %  |
|--------|---------------|------|-------------|--------------|--------------|---------|
| 1      | 9.614         | VV   | 0.3711      | 1.10702e4    | 446.78793    | 98.4689 |
| 2      | 11.160        | MM   | 0.4451      | 172.13052    | 6.44548      | 1.5311  |

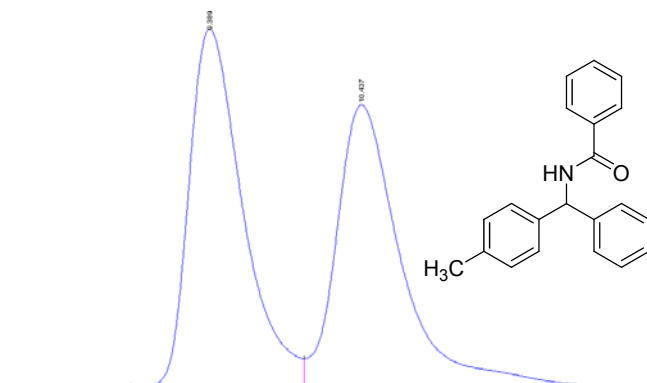

4-CH3 aryl add rac  
 10% ipa in hexane  
 chiral cel od col

| Peak # | RetTime [min] | Type | Width [min] | Area [mAU*s] | Height [mAU] | Area %  |
|--------|---------------|------|-------------|--------------|--------------|---------|
| 1      | 9.389         | VV   | 0.3922      | 1.84146e4    | 720.45837    | 51.3739 |
| 2      | 10.437        | VB   | 0.4547      | 1.74297e4    | 566.86792    | 48.6261 |



Table 1, Entry 3

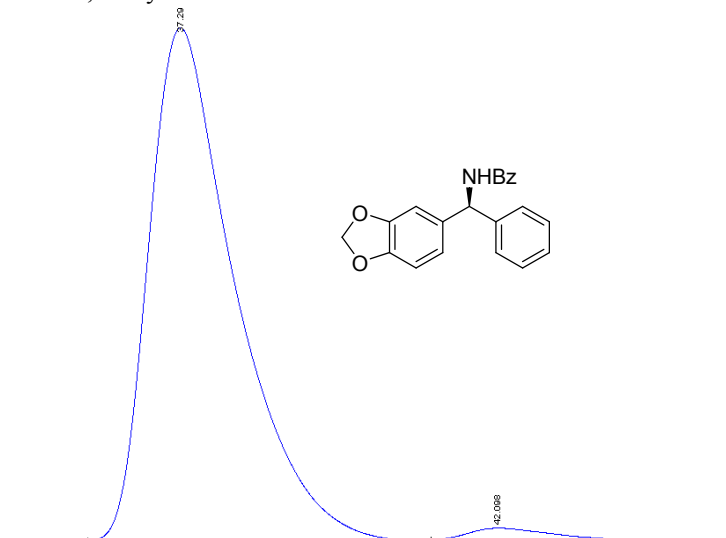

| Peak # | RetTime [min] | Type | Width [min] | Area [mAU*s] | Height [mAU] | Area %  |
|--------|---------------|------|-------------|--------------|--------------|---------|
| 1      | 37.299        | BB   | 1.3193      | 7093.71484   | 78.12447     | 97.9144 |
| 2      | 42.098        | BB   | 0.9857      | 151.09909    | 1.79577      | 2.0856  |

dioxle aryl boronate addition  
 parent imine S Br2 BINOL cat  
 10% ipa hexane chiral pak adh col

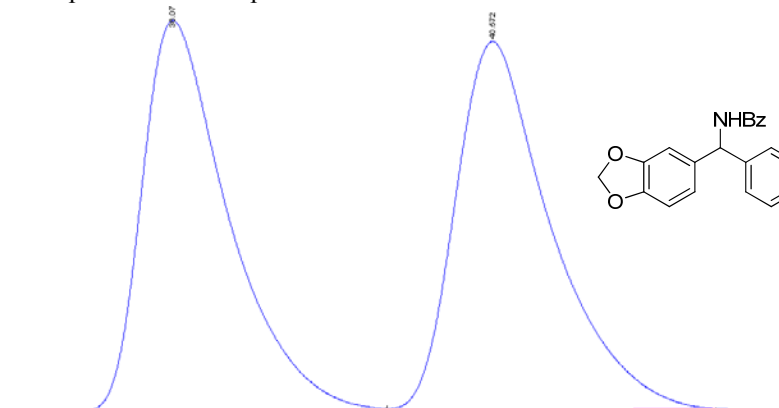

| Peak # | RetTime [min] | Type | Width [min] | Area [mAU*s] | Height [mAU] | Area %  |
|--------|---------------|------|-------------|--------------|--------------|---------|
| 1      | 36.077        | VB   | 1.2336      | 7284.78320   | 85.53969     | 49.1152 |
| 2      | 40.572        | BB   | 1.2828      | 7547.24023   | 80.57362     | 50.8848 |

dioxle aryl boronate add  
 parent imine RAC addition  
 10% ipa in hexane chiral pak adh col

Table 1, Entry 4

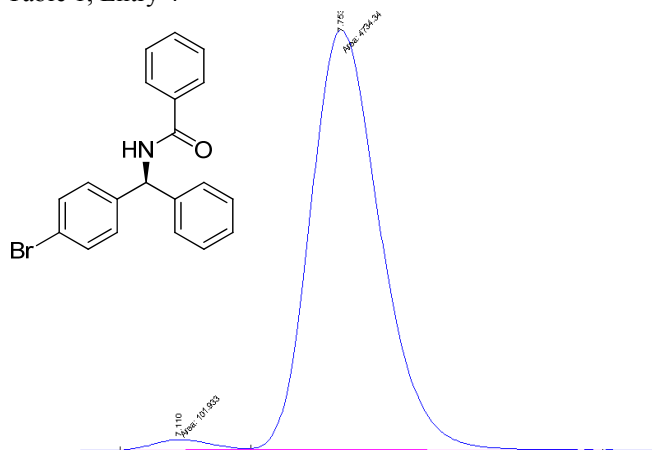

4-br aryl cat add to parent imine

chiral cel OD col

10% ipa in hexane

| Peak # | RetTime [min] | Type | Width [min] | Area [mAU*s] | Height [mAU] | Area %  |
|--------|---------------|------|-------------|--------------|--------------|---------|
| 1      | 7.110         | MM   | 0.2674      | 101.93267    | 6.35386      | 2.1077  |
| 2      | 7.753         | MM   | 0.3206      | 4734.33887   | 246.10439    | 97.8923 |

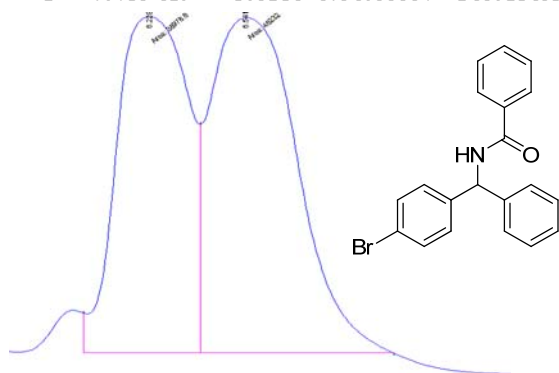

4-br rac add to parent imine

| Peak # | RetTime [min] | Type | Width [min] | Area [mAU*s] | Height [mAU] | Area %  |
|--------|---------------|------|-------------|--------------|--------------|---------|
| 1      | 6.228         | FM   | 0.2697      | 3.89786e4    | 2408.66577   | 45.7439 |
| 2      | 6.541         | FM   | 0.3209      | 4.62320e4    | 2401.33447   | 54.2561 |

12% ipa in hexane

chiralcel OD col

Table 1, entry 5: Chiralcel® OD-H column, 24cm×4.6 mm I.D., Hexanes:IPA = 85:15, 1.0 mL/min.

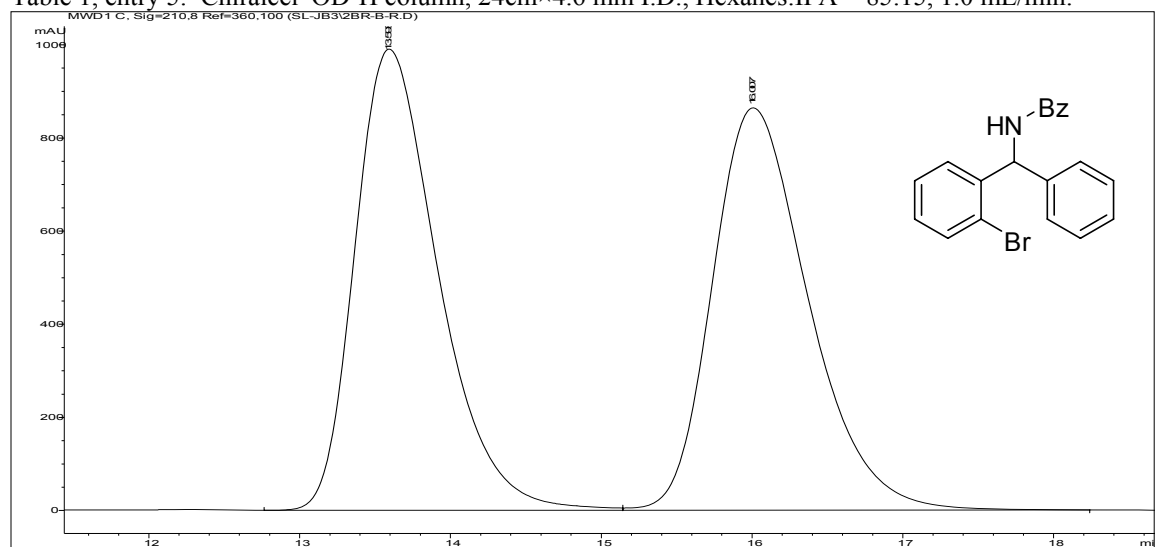

Signal 3: MWD1 C, Sig=210,8 Ref=360,100

| Peak #   | RetTime [min] | Type | Width [min] | Area [mAU*s] | Height [mAU] | Area %  |
|----------|---------------|------|-------------|--------------|--------------|---------|
| 1        | 13.593        | VV   | 0.5862      | 3.78613e4    | 990.02405    | 49.7854 |
| 2        | 16.007        | VB   | 0.6839      | 3.81878e4    | 863.66937    | 50.2146 |
| Totals : |               |      |             | 7.60491e4    | 1853.69342   |         |

(S)-Catalyst was used.

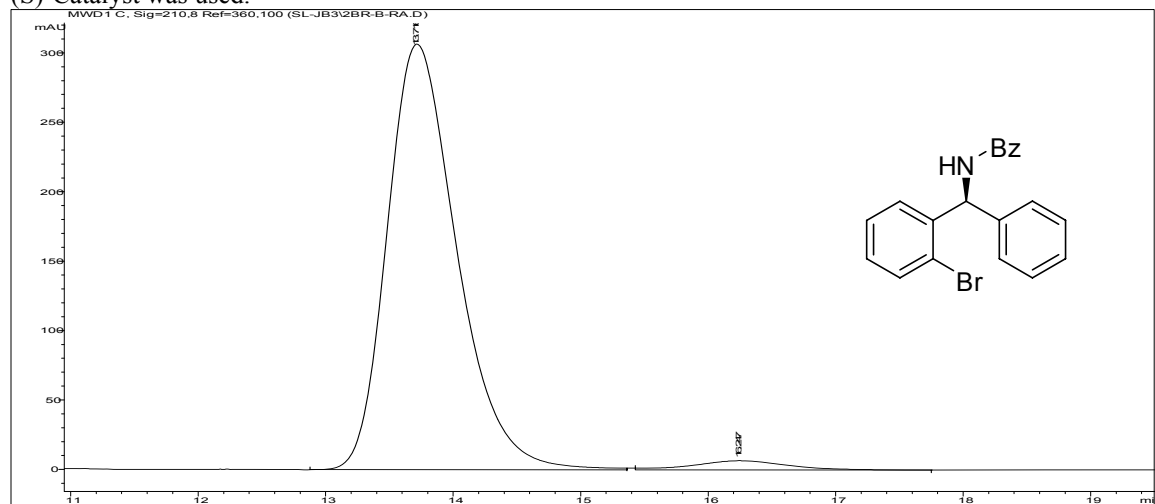

Signal 3: MWD1 C, Sig=210,8 Ref=360,100

| Peak #   | RetTime [min] | Type | Width [min] | Area [mAU*s] | Height [mAU] | Area %  |
|----------|---------------|------|-------------|--------------|--------------|---------|
| 1        | 13.716        | PB   | 0.5847      | 1.16349e4    | 306.58441    | 97.1262 |
| 2        | 16.247        | BP   | 0.6575      | 344.25525    | 6.67687      | 2.8738  |
| Totals : |               |      |             | 1.19791e4    | 313.26128    |         |

Table 1, entry 6: Chiralcel® OD-H column, 24cm×4.6 mm I.D., Hexanes:IPA = 85:15, 1.5 mL/min.

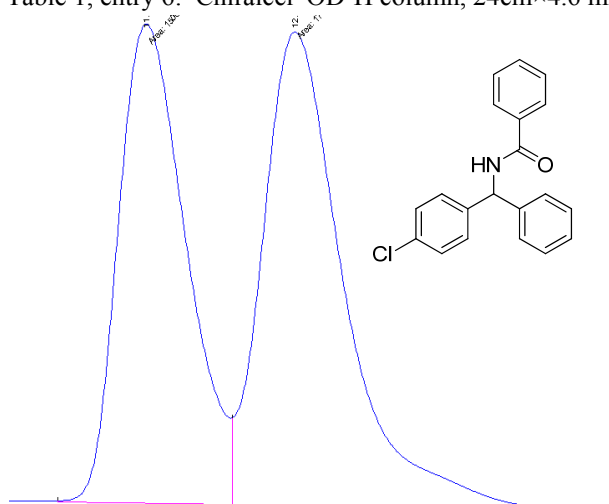

4-cl rac addition to parent imine

15% ipa in hexane

chiral cel OD col

| Peak # | RetTime [min] | Type | Width [min] | Area [mAU*s] | Height [mAU] | Area %  |
|--------|---------------|------|-------------|--------------|--------------|---------|
| 1      | 11.929        | MF   | 0.5383      | 1.50853e4    | 467.07596    | 45.6863 |
| 2      | 12.947        | FM   | 0.6478      | 1.79340e4    | 461.38361    | 54.3137 |

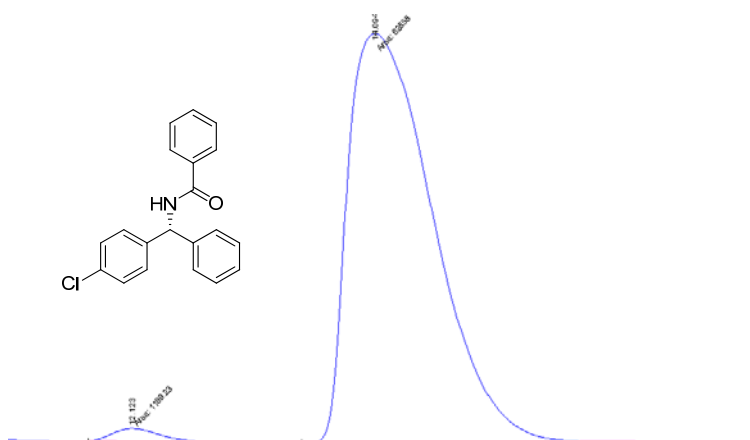

4-Cl aryl add

parent imine cat add

10% ipa in hexane

chiral cel OD col

| Peak # | RetTime [min] | Type | Width [min] | Area [mAU*s] | Height [mAU] | Area %  |
|--------|---------------|------|-------------|--------------|--------------|---------|
| 1      | 12.123        | MM   | 0.4541      | 1169.22522   | 42.91714     | 1.8261  |
| 2      | 14.094        | MM   | 0.8000      | 6.28580e4    | 1309.59607   | 98.1739 |

Table 1, entry 7: Chiralcel® OD-H column, 24cm×4.6 mm I.D., Hexanes:IPA = 85:15, 1.5 mL/min

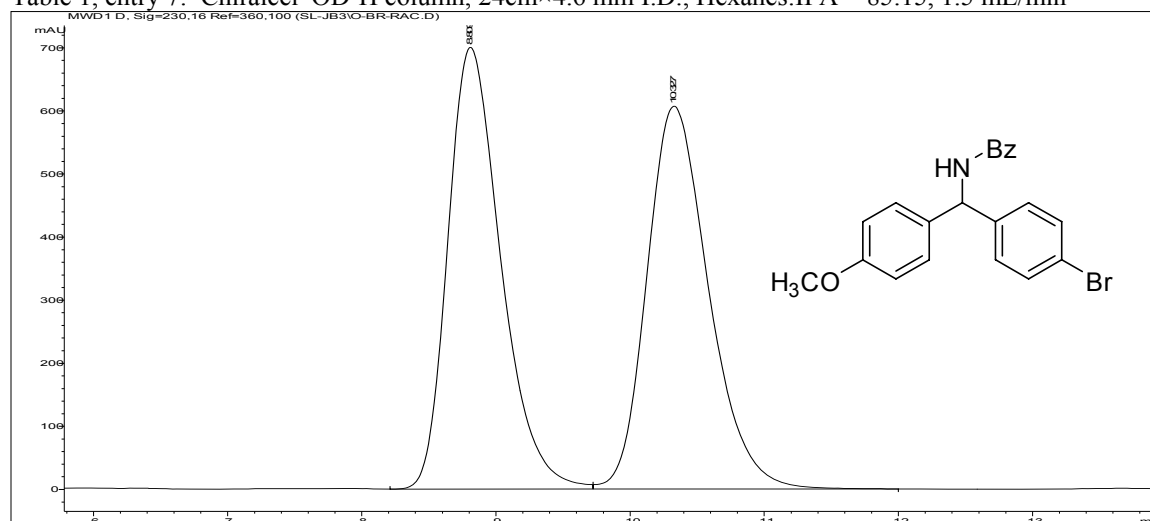

Signal 4: MWD1 D, Sig=230,16 Ref=360,100

| Peak #   | RetTime [min] | Type | Width [min] | Area [mAU*s] | Height [mAU] | Area %  |
|----------|---------------|------|-------------|--------------|--------------|---------|
| 1        | 8.809         | VV   | 0.4199      | 1.92040e4    | 700.25598    | 49.7700 |
| 2        | 10.327        | VB   | 0.4906      | 1.93815e4    | 606.84607    | 50.2300 |
| Totals : |               |      |             | 3.85854e4    | 1307.10205   |         |

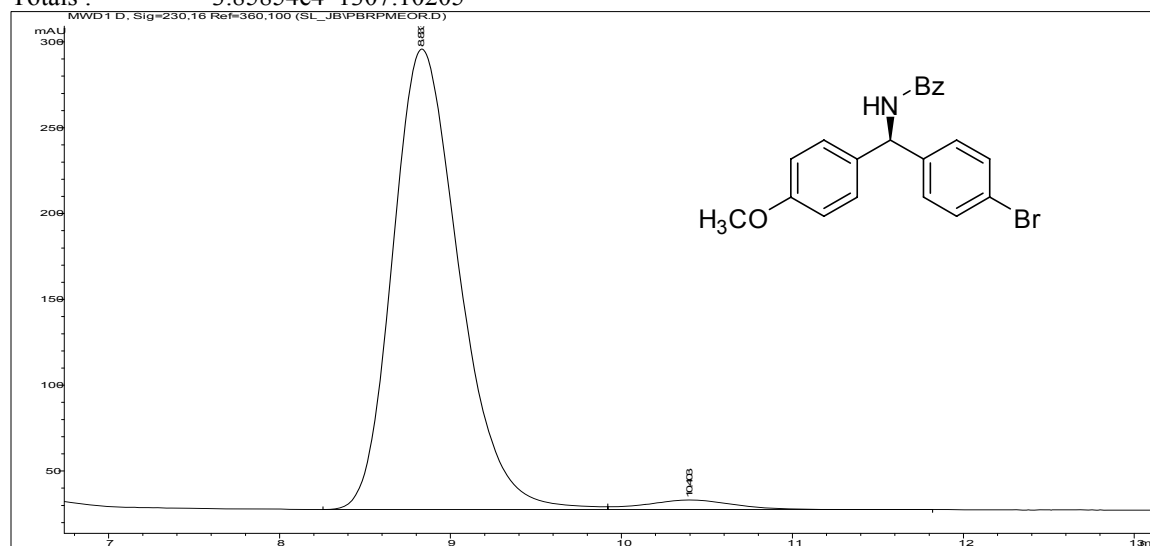

Signal 4: MWD1 D, Sig=230,16 Ref=360,100

| Peak #   | RetTime [min] | Type | Width [min] | Area [mAU*s] | Height [mAU] | Area %  |
|----------|---------------|------|-------------|--------------|--------------|---------|
| 1        | 8.833         | PB   | 0.4167      | 7237.32129   | 268.33923    | 98.4428 |
| 2        | 10.413        | MM   | 0.4512      | 114.48315    | 4.22922      | 1.5572  |
| Totals : |               |      |             | 7351.80444   | 272.56845    |         |

Table 1, entry 8: Chiralcel® OD-H column, 24cm×4.6 mm I.D., Hexanes:IPA = 85:15, 1.0 mL/min.

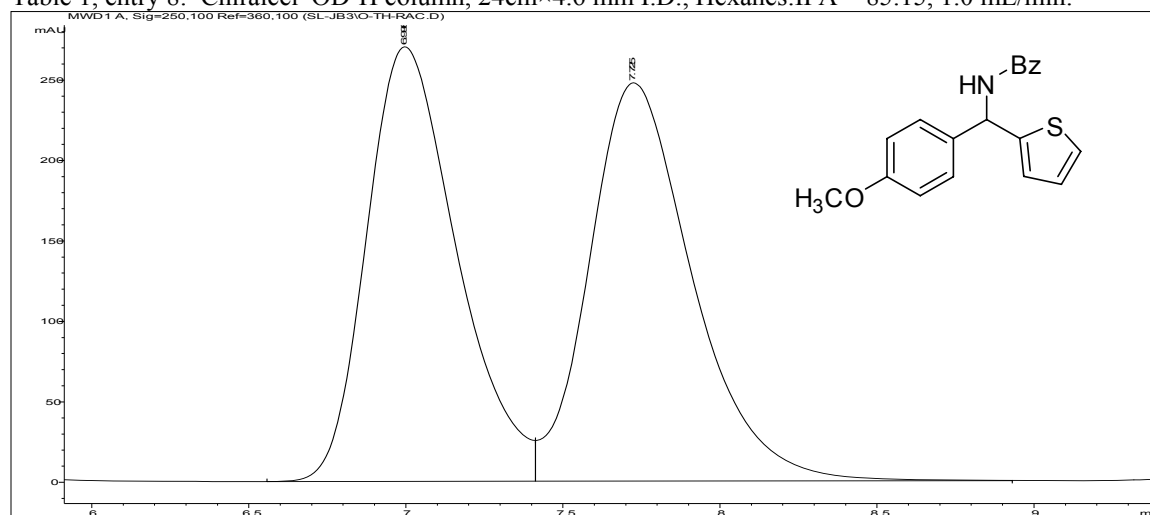

Signal 1: MWD1 A, Sig=250,100 Ref=360,100

| Peak #  | RetTime [min] | Type | Width [min] | Area [mAU*s] | Height [mAU] | Area %  |
|---------|---------------|------|-------------|--------------|--------------|---------|
| 1       | 6.996         | BV   | 0.3072      | 5398.97461   | 270.13000    | 48.8780 |
| 2       | 7.725         | VB   | 0.3482      | 5646.83691   | 247.52339    | 51.1220 |
| Totals: |               |      |             | 1.10458e4    | 517.65340    |         |

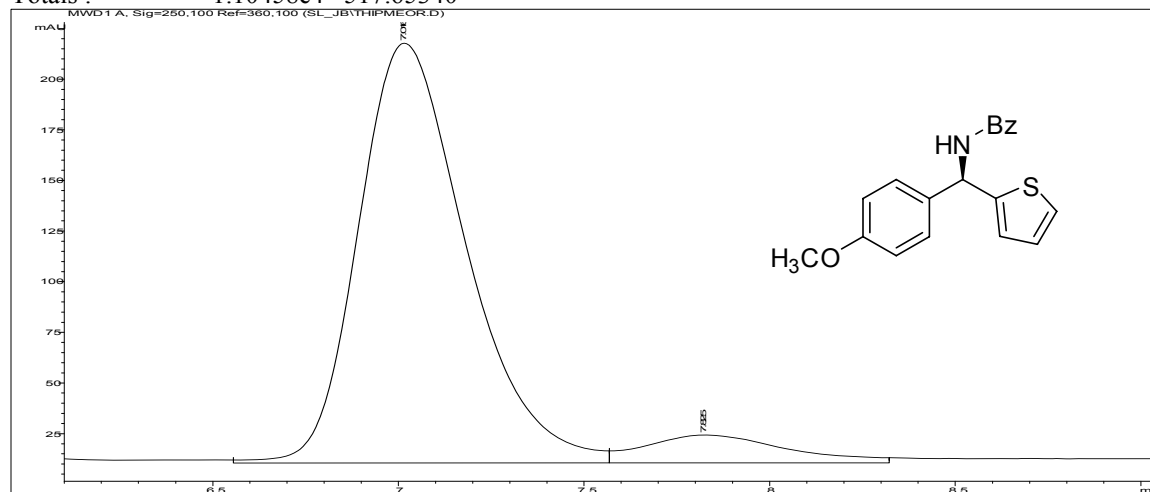

Signal 1: MWD1 A, Sig=250,100 Ref=360,100

| Peak #  | RetTime [min] | Type | Width [min] | Area [mAU*s] | Height [mAU] | Area %  |
|---------|---------------|------|-------------|--------------|--------------|---------|
| 1       | 7.016         | VV   | 0.3070      | 4174.81299   | 207.25307    | 96.0564 |
| 2       | 7.829         | MM   | 0.3133      | 171.39931    | 9.11857      | 3.9436  |
| Totals: |               |      |             | 4346.21230   | 216.37164    |         |

Table 1, entry 9: Chiralcel® OD-H column, 24cm×4.6 mm I.D., Hexanes:IPA = 85:15, 1.0 mL/min.

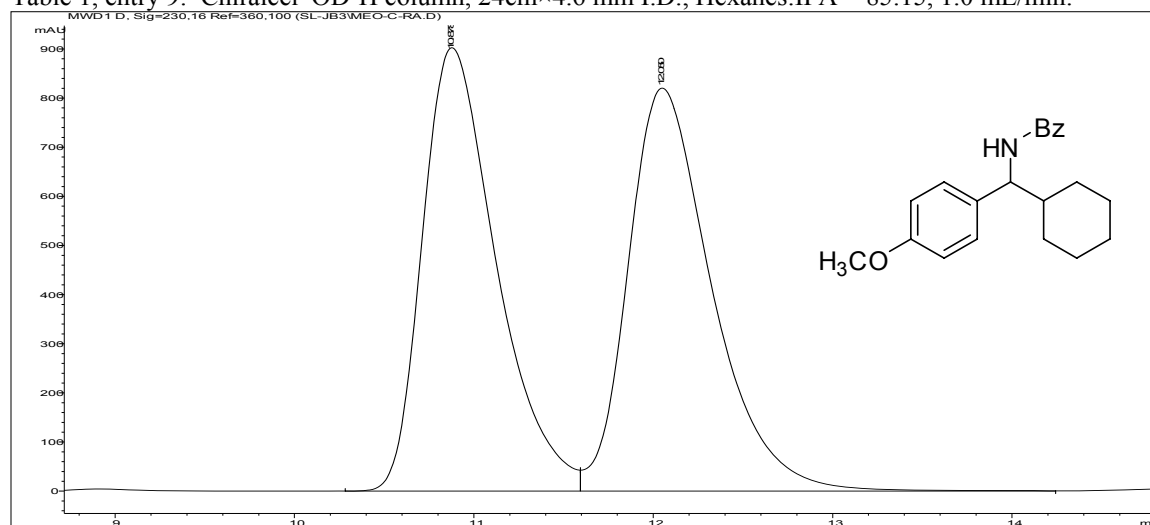

Signal 4: MWD1 D, Sig=230,16 Ref=360,100

| Peak #   | RetTime [min] | Type | Width [min] | Area [mAU*s] | Height [mAU] | Area %  |
|----------|---------------|------|-------------|--------------|--------------|---------|
| 1        | 10.878        | BV   | 0.4355      | 2.57990e4    | 902.45428    | 49.2695 |
| 2        | 12.050        | VB   | 0.4939      | 2.65641e4    | 820.14801    | 50.7305 |
| Totals : |               |      |             | 5.23631e4    | 1722.60229   |         |

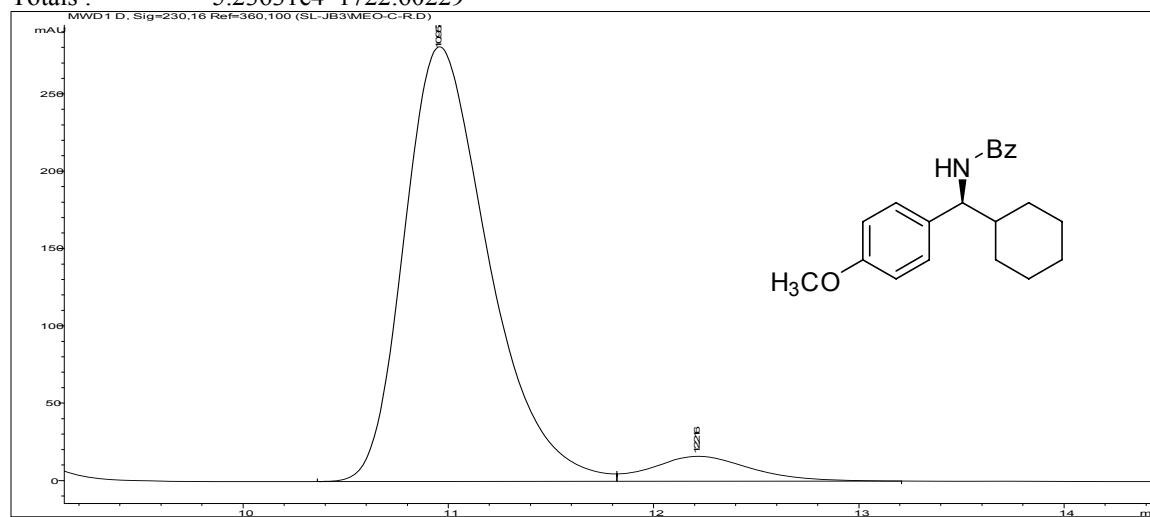

Signal 4: MWD1 D, Sig=230,16 Ref=360,100

| Peak #   | RetTime [min] | Type | Width [min] | Area [mAU*s] | Height [mAU] | Area %  |
|----------|---------------|------|-------------|--------------|--------------|---------|
| 1        | 10.957        | BV   | 0.4367      | 8014.79199   | 281.07831    | 95.6440 |
| 2        | 12.222        | MM   | 0.4610      | 365.02673    | 13.19595     | 4.3560  |
| Totals : |               |      |             | 8379.81873   | 294.27426    |         |

Table 1, entry 10: Chiralcel® OD-H column, 24cm×4.6 mm I.D., Hexanes:IPA = 90:10, 1.5 mL/min.

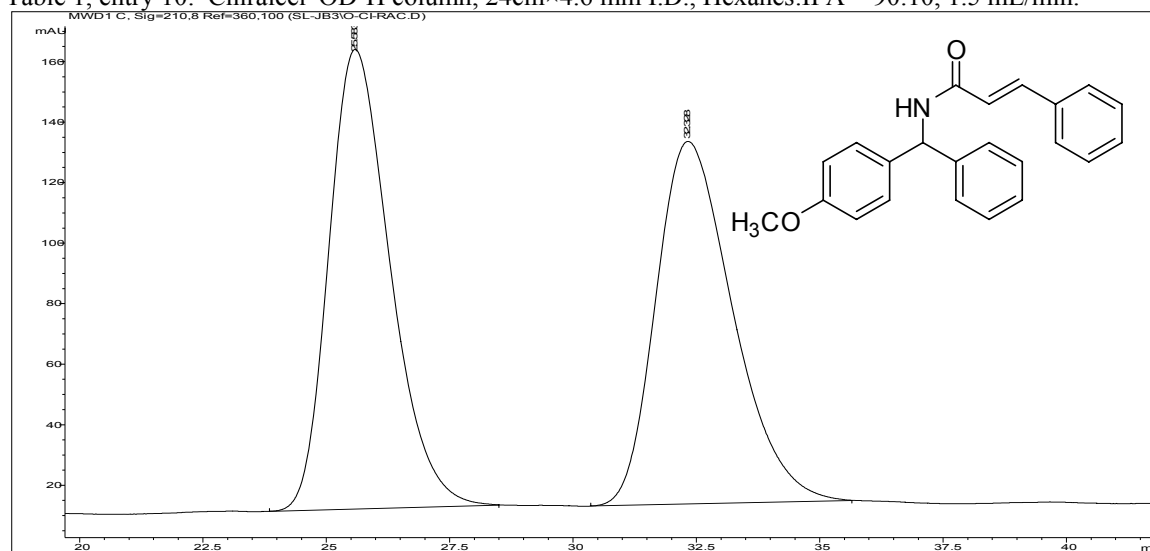

Signal 3: MWD1 C, Sig=210,8 Ref=360,100

| Peak #   | RetTime [min] | Type | Width [min] | Area [mAU*s] | Height [mAU] | Area %  |
|----------|---------------|------|-------------|--------------|--------------|---------|
| 1        | 25.583        | BB   | 1.2802      | 1.30977e4    | 151.87277    | 50.2433 |
| 2        | 32.328        | BB   | 1.5927      | 1.29709e4    | 119.84405    | 49.7567 |
| Totals : |               |      |             | 2.60687e4    | 271.71682    |         |

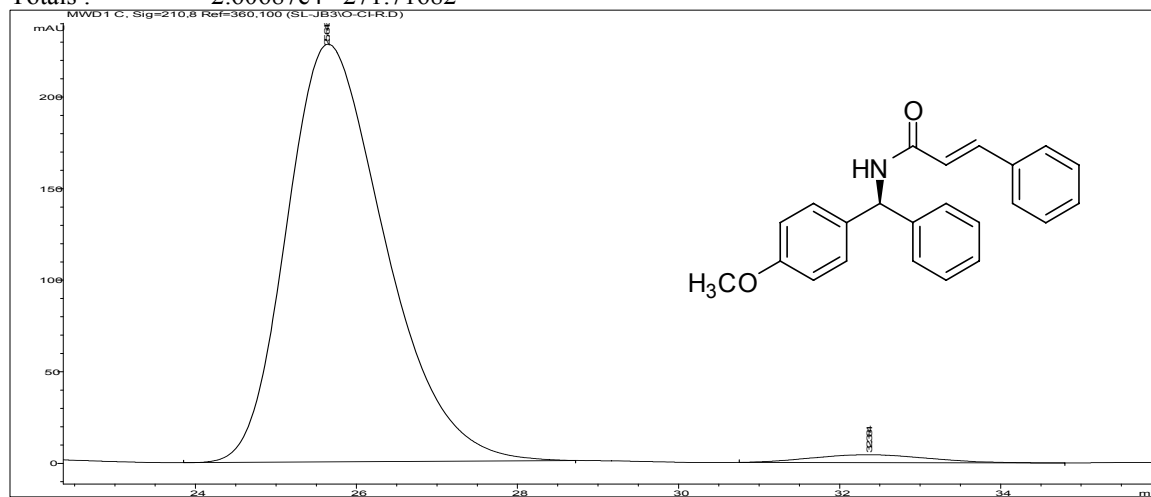

Signal 3: MWD1 C, Sig=210,8 Ref=360,100

| Peak #   | RetTime [min] | Type | Width [min] | Area [mAU*s] | Height [mAU] | Area %  |
|----------|---------------|------|-------------|--------------|--------------|---------|
| 1        | 25.646        | PB   | 1.2791      | 1.93826e4    | 228.15237    | 97.7582 |
| 2        | 32.384        | BP   | 1.2023      | 444.48978    | 4.34208      | 2.2418  |
| Totals : |               |      |             | 1.98271e4    | 232.49445    |         |



Table 1, entry 11: Chiralcel® OD-H column, 24cm×4.6 mm I.D., Hexanes:IPA = 85:15, 1.5 mL/min.

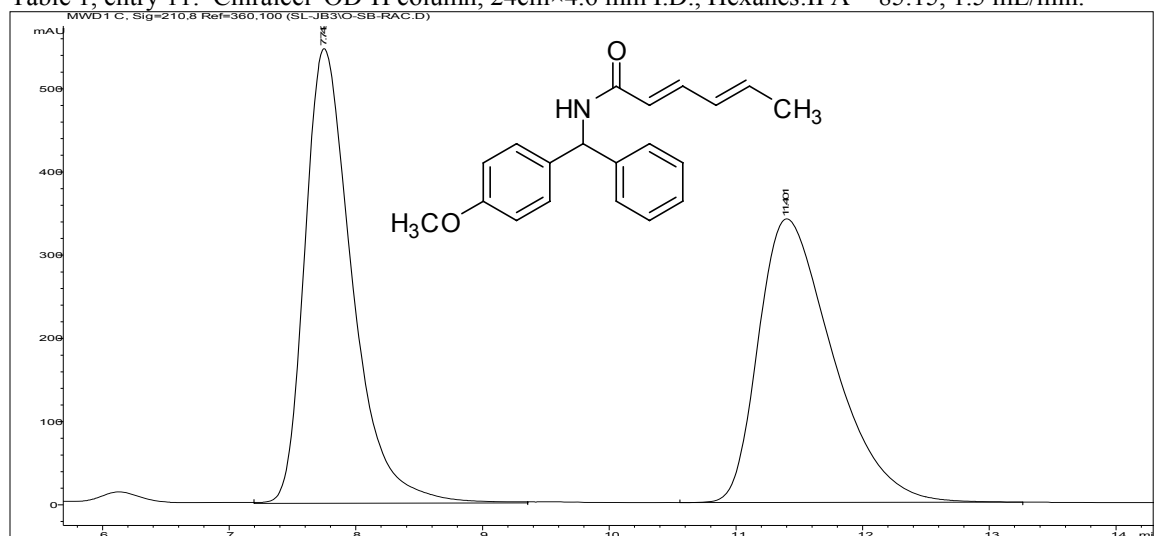

Signal 3: MWD1 C, Sig=210,8 Ref=360,100

| Peak #  | RetTime [min] | Type | Width [min] | Area [mAU*s] | Height [mAU] | Area %  |
|---------|---------------|------|-------------|--------------|--------------|---------|
| 1       | 7.749         | VB   | 0.3951      | 1.41936e4    | 546.32623    | 50.5788 |
| 2       | 11.401        | PB   | 0.6248      | 1.38688e4    | 340.78531    | 49.4212 |
| Totals: |               |      |             | 2.80625e4    | 887.11154    |         |

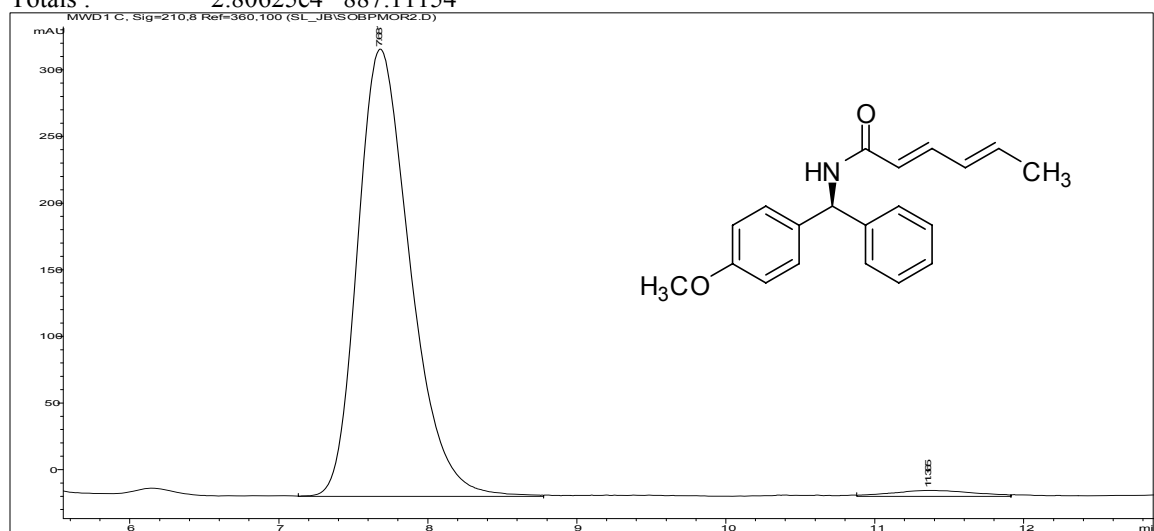

Signal 3: MWD1 C, Sig=210,8 Ref=360,100

| Peak #  | RetTime [min] | Type | Width [min] | Area [mAU*s] | Height [mAU] | Area %  |
|---------|---------------|------|-------------|--------------|--------------|---------|
| 1       | 7.681         | VV   | 0.3781      | 8232.26465   | 335.75433    | 97.8844 |
| 2       | 11.365        | VV   | 0.4561      | 177.92862    | 4.61168      | 2.1156  |
| Totals: |               |      |             | 8410.19327   | 340.36601    |         |

Table 1, entry 12: Chiralcel® OD-H column, 24cm×4.6 mm I.D., Hexanes:IPA = 90:10, 1.0 mL/min.

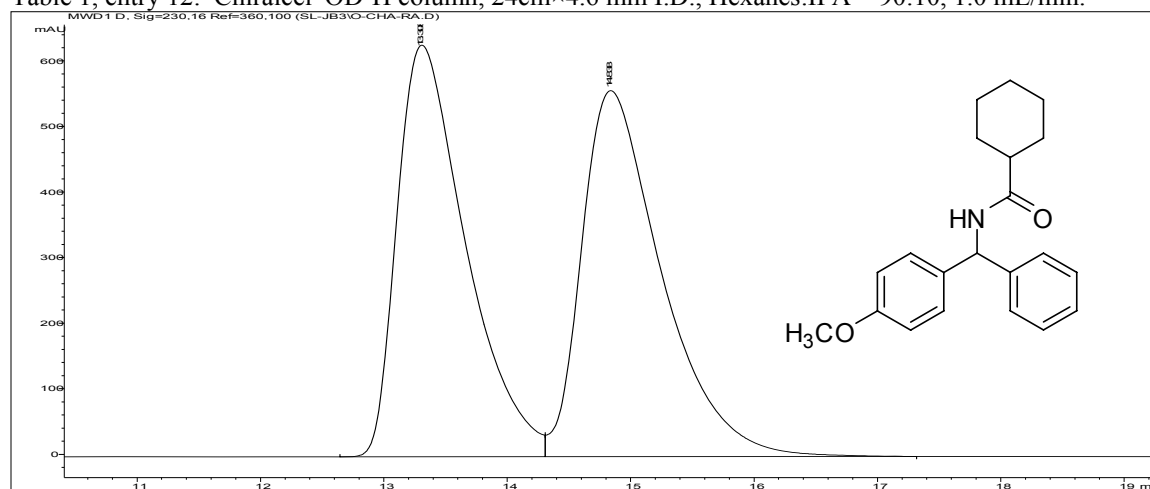

Signal 4: MWD1 D, Sig=230,16 Ref=360,100

| Peak #   | RetTime [min] | Type | Width [min] | Area [mAU*s] | Height [mAU] | Area %  |
|----------|---------------|------|-------------|--------------|--------------|---------|
| 1        | 13.308        | BV   | 0.5866      | 2.42548e4    | 627.93634    | 49.1644 |
| 2        | 14.838        | VB   | 0.6761      | 2.50793e4    | 558.24994    | 50.8356 |
| Totals : |               |      |             | 4.93341e4    | 1186.18628   |         |

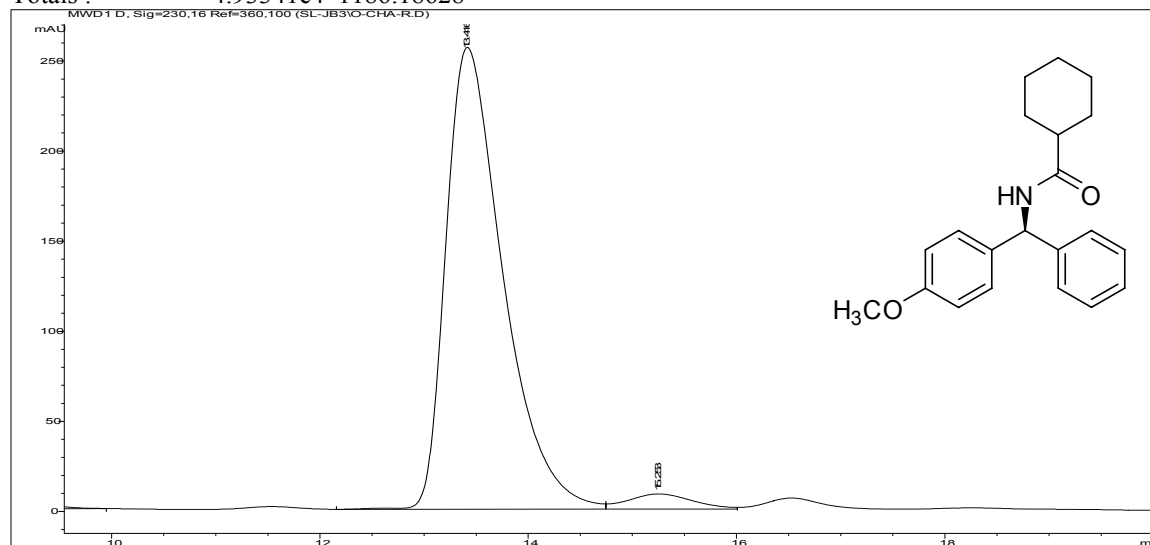

Signal 4: MWD1 D, Sig=230,16 Ref=360,100

| Peak #   | RetTime [min] | Type | Width [min] | Area [mAU*s] | Height [mAU] | Area %  |
|----------|---------------|------|-------------|--------------|--------------|---------|
| 1        | 13.416        | MM   | 0.6282      | 9650.19043   | 256.01608    | 97.6828 |
| 2        | 15.262        | MM   | 0.5872      | 228.91667    | 6.49718      | 2.3172  |
| Totals : |               |      |             | 9879.10710   | 262.51326    |         |

## HPLC Analysis of Chiral Vinyl Amide Products

Table 2, entry 1: Chiralpak® AD-H column, 24cm×4.6 mm I.D., Hexanes:IPA = 90:10, 1.5mL/min

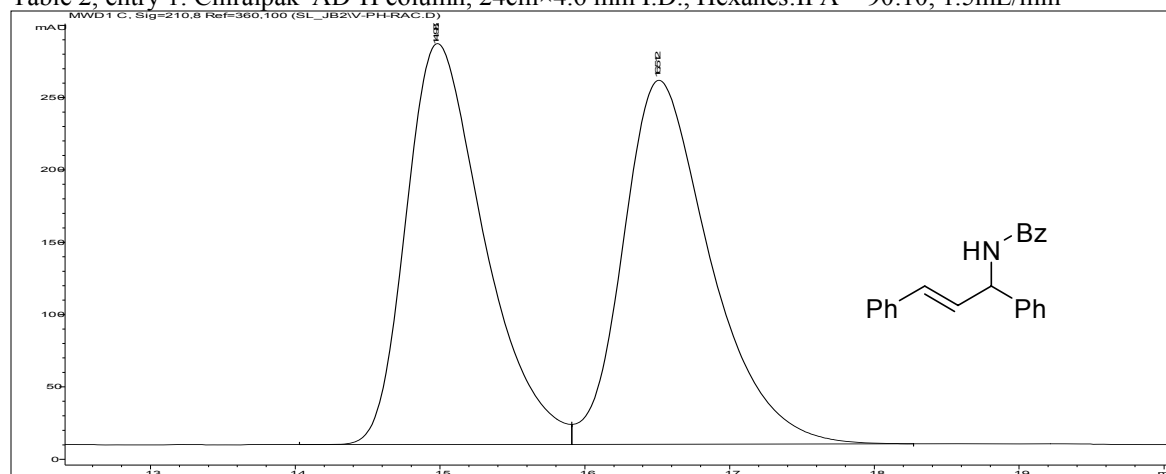

Signal 3: MWD1 C, Sig=210,8 Ref=360,100

| Peak #   | RetTime [min] | Type | Width [min] | Area [mAU*s] | Height [mAU] | Area %  |
|----------|---------------|------|-------------|--------------|--------------|---------|
| 1        | 14.982        | VV   | 0.5703      | 1.03674e4    | 277.19812    | 49.6757 |
| 2        | 16.512        | VB   | 0.6311      | 1.05028e4    | 251.55400    | 50.3243 |
| Totals : |               |      |             | 2.08703e4    | 528.75212    |         |

(S)-catalyst was used.

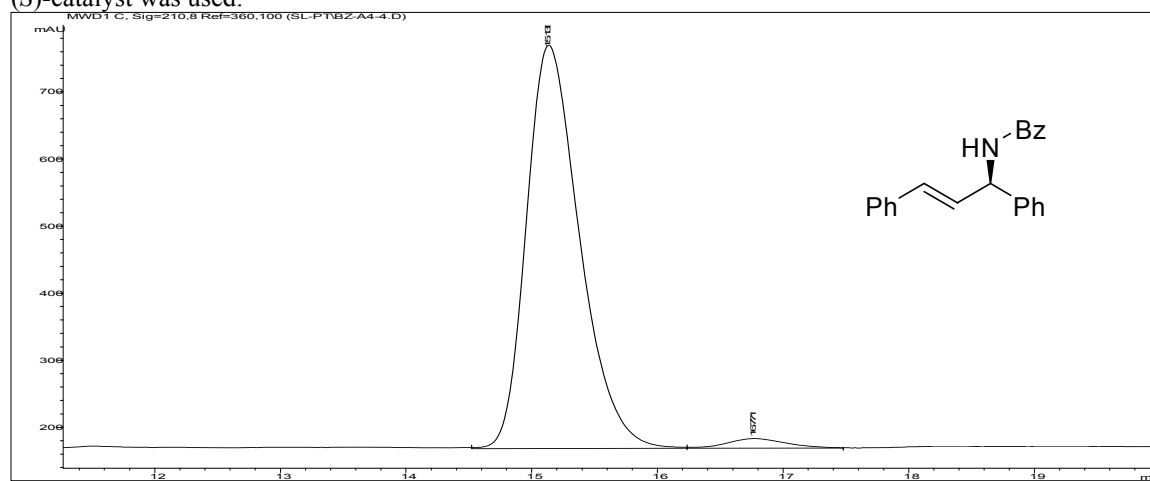

Signal 3: MWD1 C, Sig=210,8 Ref=360,100

| Peak #   | RetTime [min] | Type | Width [min] | Area [mAU*s] | Height [mAU] | Area %  |
|----------|---------------|------|-------------|--------------|--------------|---------|
| 1        | 15.135        | VV   | 0.4493      | 1.76922e4    | 601.30450    | 97.5654 |
| 2        | 16.771        | VV   | 0.4447      | 460.08896    | 14.17573     | 2.4346  |
| Totals : |               |      |             | 1.81523e4    | 615.48023    |         |

Table 2, entry 2: Chiralcel<sup>®</sup> OD column, 24cm×4.6 mm I.D., Hexanes:IPA = 85:15, 1.0 mL/min

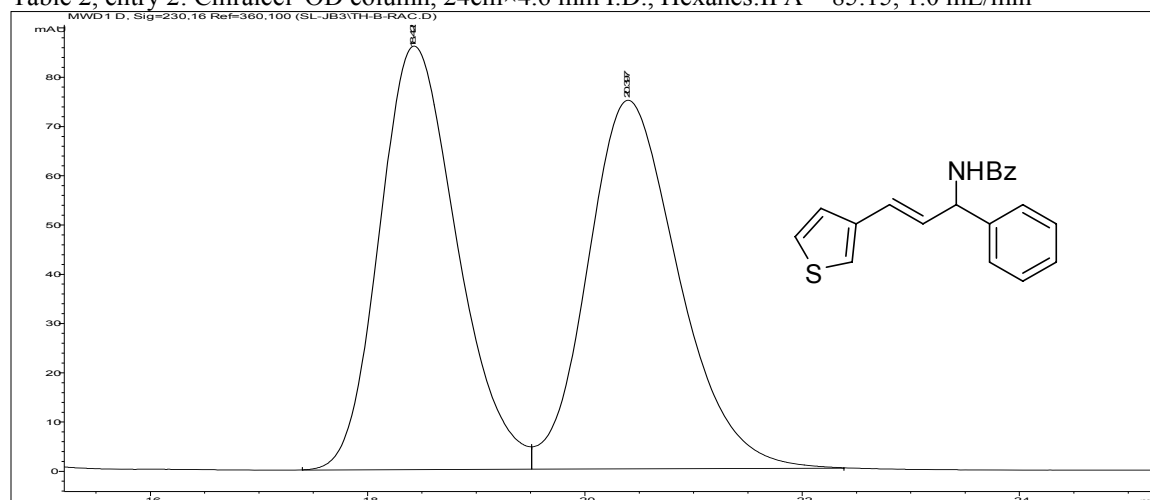

Signal 4: MWD1 D, Sig=230,16 Ref=360,100

| Peak #   | RetTime [min] | Type | Width [min] | Area [mAU*s] | Height [mAU] | Area %  |
|----------|---------------|------|-------------|--------------|--------------|---------|
| 1        | 18.428        | BV   | 0.7695      | 4273.20557   | 86.02419     | 49.5806 |
| 2        | 20.397        | VB   | 0.8912      | 4345.49707   | 74.86439     | 50.4194 |
| Totals : |               |      |             | 8618.70264   | 160.88857    |         |

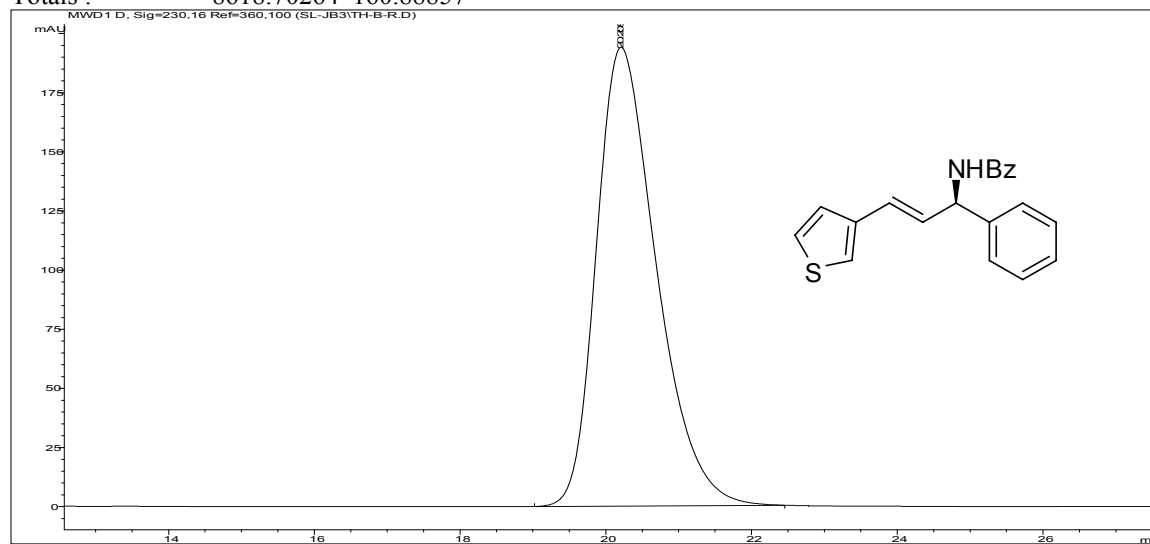

Signal 4: MWD1 D, Sig=230,16 Ref=360,100

| Peak #   | RetTime [min] | Type | Width [min] | Area [mAU*s] | Height [mAU] | Area %   |
|----------|---------------|------|-------------|--------------|--------------|----------|
| 1        | 20.208        | BB   | 0.8713      | 1.10978e4    | 194.03604    | 100.0000 |
| Totals : |               |      |             | 1.10978e4    | 194.03604    |          |

Table 2, entry 3: Chiralpak® AD-H column, 24cm×4.6 mm I.D., Hexanes:IPA = 90:10, 1.5mL/min

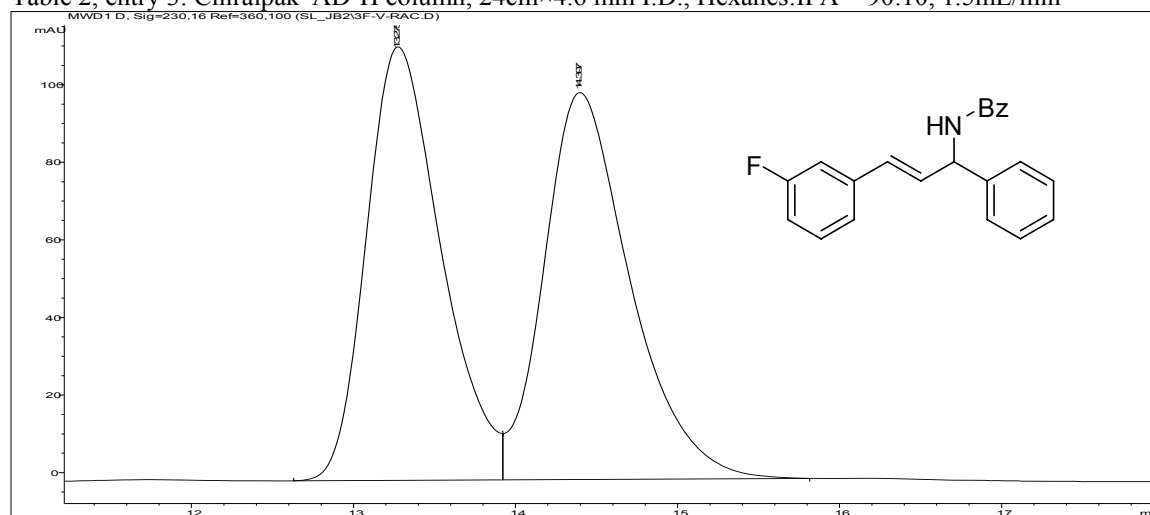

Signal 4: MWD1 D, Sig=230,16 Ref=360,100

| Peak #   | RetTime [min] | Type | Width [min] | Area [mAU*s] | Height [mAU] | Area %  |
|----------|---------------|------|-------------|--------------|--------------|---------|
| 1        | 13.275        | BV   | 0.4922      | 3585.25977   | 111.77981    | 49.2559 |
| 2        | 14.397        | VB   | 0.5598      | 3693.58423   | 99.78970     | 50.7441 |
| Totals : |               |      |             | 7278.84399   | 211.56951    |         |

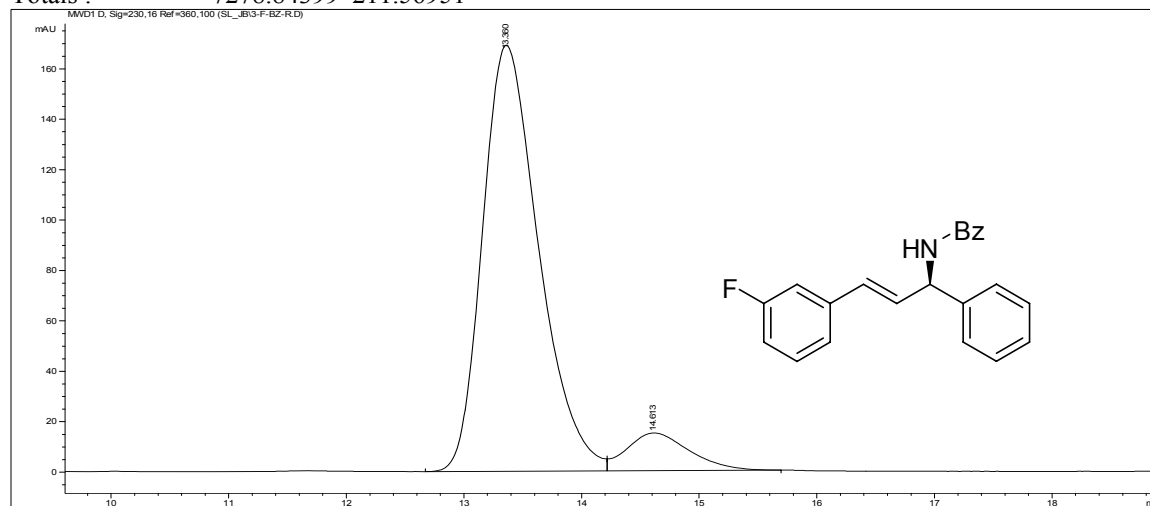

Signal 4: MWD1 D, Sig=230,16 Ref=360,100

| Peak #   | RetTime [min] | Type | Width [min] | Area [mAU*s] | Height [mAU] | Area %  |
|----------|---------------|------|-------------|--------------|--------------|---------|
| 1        | 13.360        | PV   | 0.5066      | 5600.18848   | 169.02145    | 95.4606 |
| 2        | 14.618        | MM   | 0.4370      | 266.30118    | 10.15634     | 4.5394  |
| Totals : |               |      |             | 5866.48965   | 179.17779    |         |

Table 2, entry 4: Chiralpak® AD-H column, 24cm×4.6 mm I.D., Hexanes:IPA = 80:20, 1.5 mL/min.

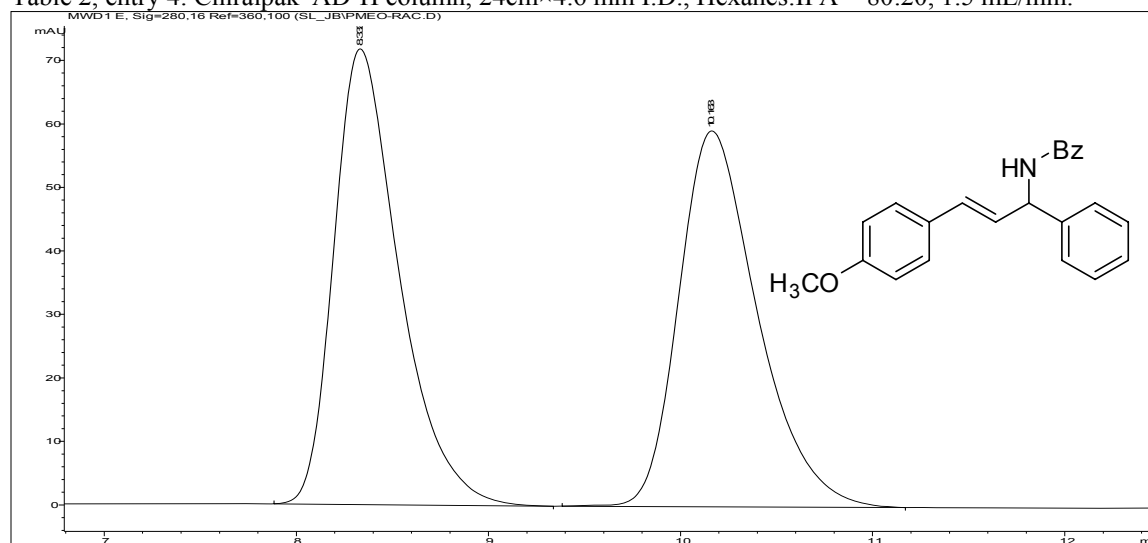

Signal 5: MWD1 E, Sig=280,16 Ref=360,100

| Peak # | RetTime [min] | Type | Width [min] | Area [mAU*s] | Height [mAU] | Area %  |
|--------|---------------|------|-------------|--------------|--------------|---------|
| 1      | 8.333         | BP   | 0.3576      | 1696.33398   | 71.79662     | 50.2006 |
| 2      | 10.163        | BB   | 0.4336      | 1682.77795   | 59.20156     | 49.7994 |

Totals : 3379.11194 130.99819

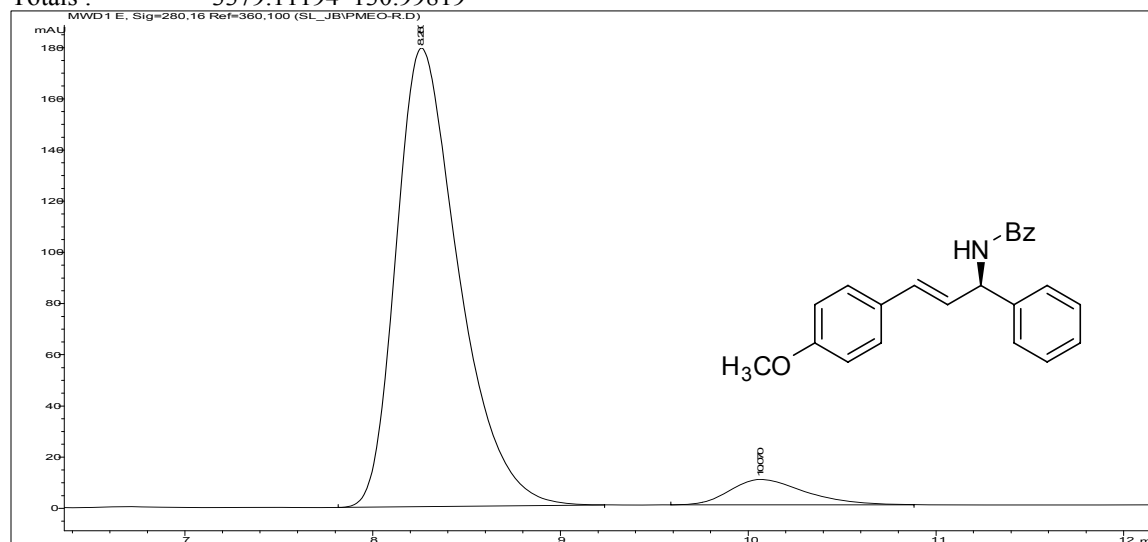

Signal 5: MWD1 E, Sig=280,16 Ref=360,100

| Peak # | RetTime [min] | Type | Width [min] | Area [mAU*s] | Height [mAU] | Area %  |
|--------|---------------|------|-------------|--------------|--------------|---------|
| 1      | 8.260         | PB   | 0.3504      | 4153.03906   | 179.19017    | 96.1980 |
| 2      | 10.070        | MM   | 0.3529      | 164.14087    | 7.75224      | 3.8020  |

Totals : 4317.17993 186.94242

Table 2, entry 5: Chiralpak® AD-H column, 24cm×4.6 mm I.D., Hexanes:IPA = 95:5, 1.0 mL/min.

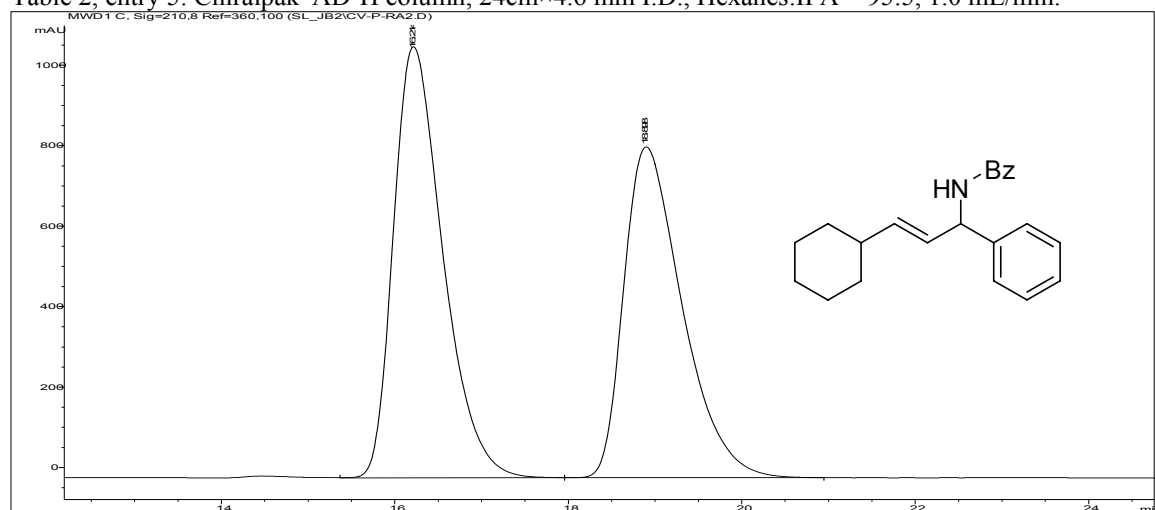

Signal 3: MWD1 C, Sig=210,8 Ref=360,100

| Peak #   | RetTime [min] | Type | Width [min] | Area [mAU*s] | Height [mAU] | Area %  |
|----------|---------------|------|-------------|--------------|--------------|---------|
| 1        | 16.214        | VV   | 0.6058      | 4.24050e4    | 1071.41309   | 52.4795 |
| 2        | 18.898        | VB   | 0.7128      | 3.83980e4    | 822.31238    | 47.5205 |
| Totals : |               |      |             | 8.08031e4    | 1893.72546   |         |

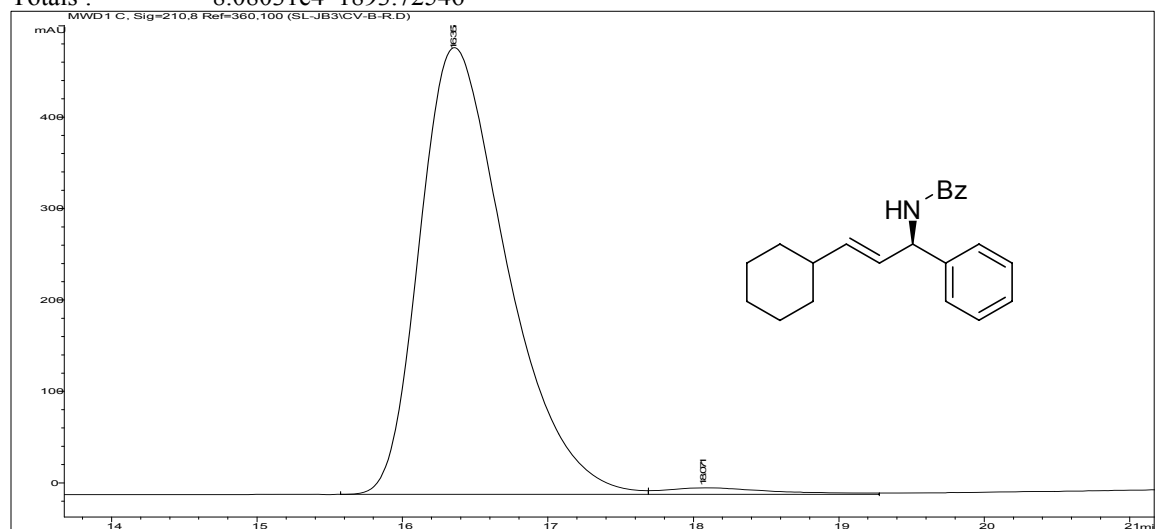

Signal 3: MWD1 C, Sig=210,8 Ref=360,100

| Peak #   | RetTime [min] | Type | Width [min] | Area [mAU*s] | Height [mAU] | Area %  |
|----------|---------------|------|-------------|--------------|--------------|---------|
| 1        | 16.357        | BV   | 0.6298      | 2.02679e4    | 488.71332    | 98.2131 |
| 2        | 18.071        | VV   | 0.6824      | 368.76419    | 7.14209      | 1.7869  |
| Totals : |               |      |             | 2.06366e4    | 495.85541    |         |

Table 2, entry 6: Chiralpak® AD-H column, 24cm×4.6 mm I.D., Hexanes:IPA = 85:15, 1.0 mL/min.

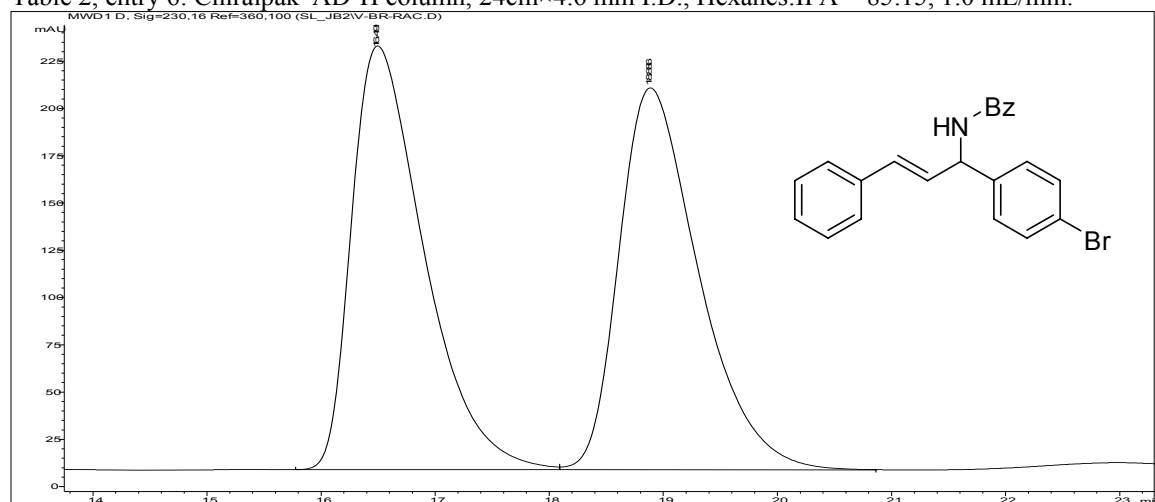

Signal 4: MWD1 D, Sig=230,16 Ref=360,100

| Peak #  | RetTime [min] | Type | Width [min] | Area [mAU*s] | Height [mAU] | Area %  |
|---------|---------------|------|-------------|--------------|--------------|---------|
| 1       | 16.495        | PV   | 0.6727      | 9888.23340   | 224.12767    | 50.2628 |
| 2       | 18.886        | VB   | 0.7412      | 9784.83008   | 201.96854    | 49.7372 |
| Totals: |               |      |             | 1.96731e4    | 426.09621    |         |

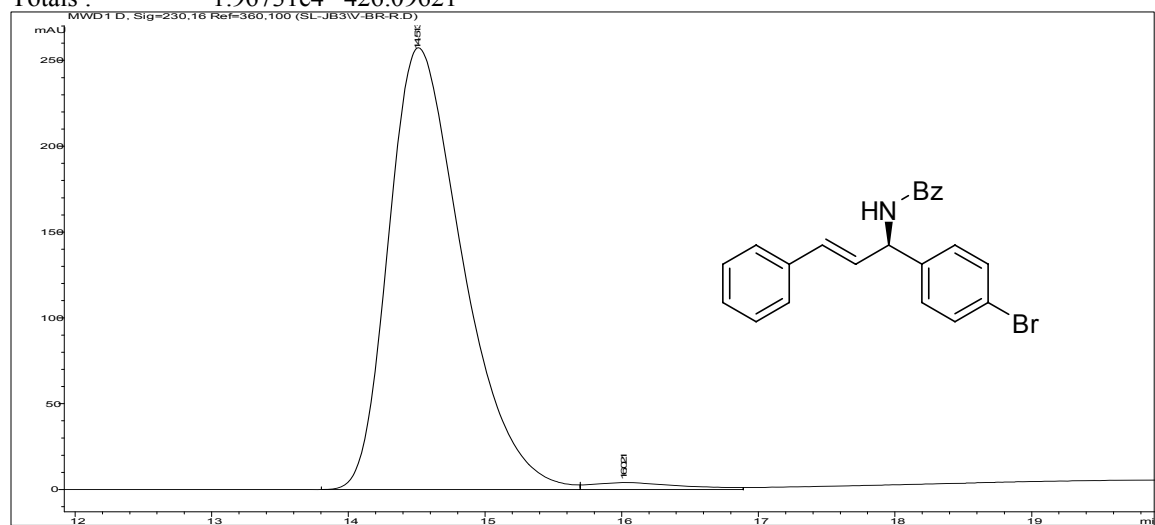

Signal 4: MWD1 D, Sig=230,16 Ref=360,100

| Peak #  | RetTime [min] | Type | Width [min] | Area [mAU*s] | Height [mAU] | Area %  |
|---------|---------------|------|-------------|--------------|--------------|---------|
| 1       | 17.037        | PB   | 0.6738      | 3553.24243   | 80.37569     | 95.3726 |
| 2       | 19.436        | MM   | 0.3706      | 172.40155    | 7.75419      | 4.6274  |
| Totals: |               |      |             | 3725.64398   | 88.12988     |         |



Table 2, entry 7: Chiralpak® AD-H column, 24cm×4.6 mm I.D., Hexanes:IPA = 85:15, 1.0 mL/min.

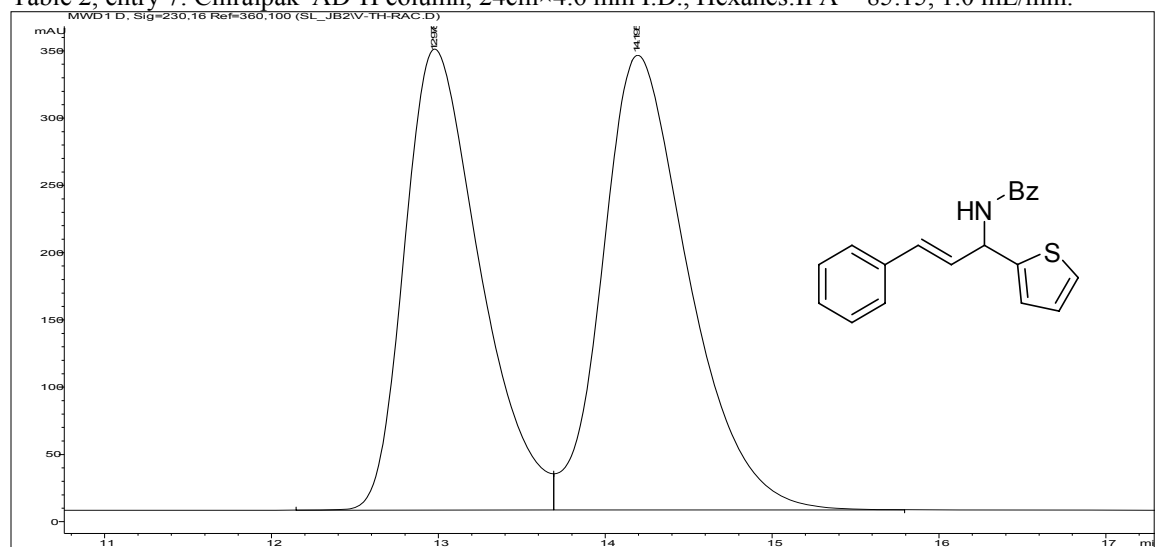

Signal 4: MWD1 D, Sig=230,16 Ref=360,100

| Peak #  | RetTime [min] | Type | Width [min] | Area [mAU*s] | Height [mAU] | Area %  |
|---------|---------------|------|-------------|--------------|--------------|---------|
| 1       | 12.978        | BV   | 0.4808      | 1.07755e4    | 342.76849    | 47.0947 |
| 2       | 14.195        | VB   | 0.5396      | 1.21050e4    | 338.17123    | 52.9053 |
| Totals: |               |      |             | 2.28806e4    | 680.93973    |         |

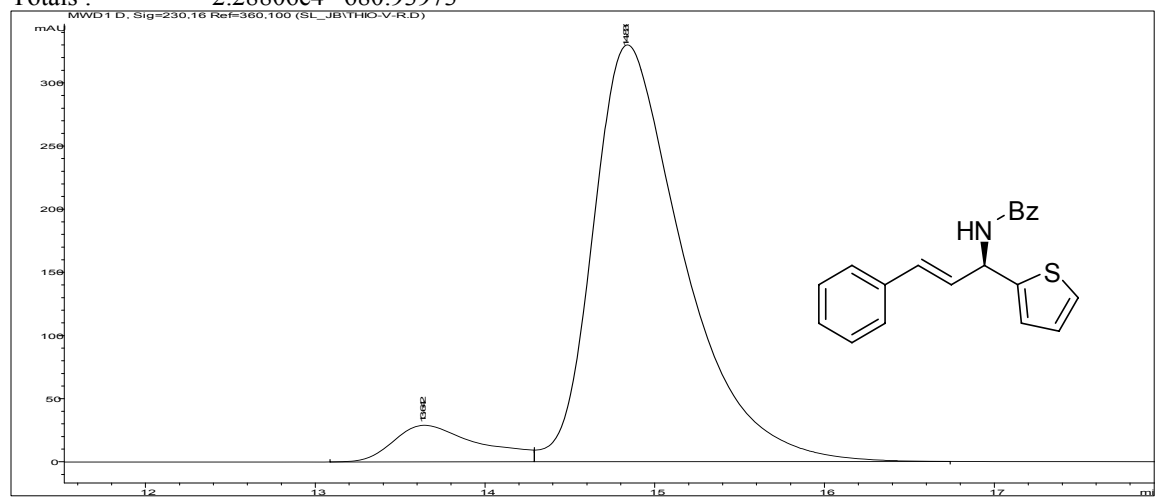

Signal 4: MWD1 D, Sig=230,16 Ref=360,100

| Peak #  | RetTime [min] | Type | Width [min] | Area [mAU*s] | Height [mAU] | Area %  |
|---------|---------------|------|-------------|--------------|--------------|---------|
| 1       | 13.642        | MM   | 0.4411      | 622.37897    | 23.51438     | 4.9802  |
| 2       | 14.839        | MM   | 0.6064      | 1.18746e4    | 326.36249    | 95.0198 |
| Totals: |               |      |             | 1.24970e4    | 349.87687    |         |

Table 2, entry 8: Chiralpak® AD-H column, 24cm×4.6 mm I.D., Hexanes:IPA = 90:10, 1.0 mL/min.

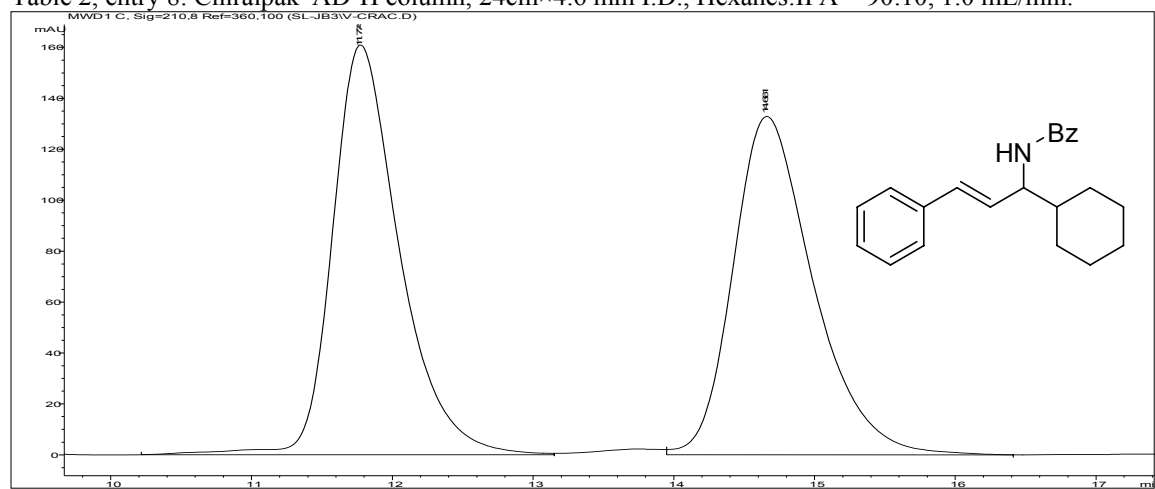

Signal 3: MWD1 C, Sig=210,8 Ref=360,100

| Peak #  | RetTime [min] | Type | Width [min] | Area [mAU*s] | Height [mAU] | Area %  |
|---------|---------------|------|-------------|--------------|--------------|---------|
| 1       | 11.774        | BB   | 0.4993      | 5343.25977   | 160.95232    | 50.3658 |
| 2       | 14.661        | VB   | 0.5943      | 5265.65381   | 132.89377    | 49.6342 |
| Totals: |               |      |             | 1.06089e4    | 293.84608    |         |

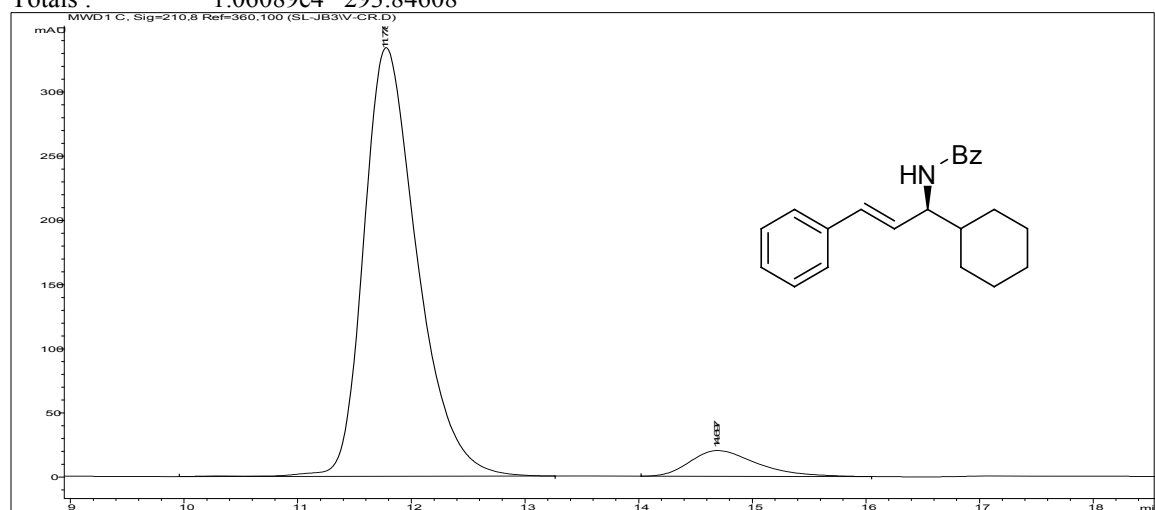

Signal 3: MWD1 C, Sig=210,8 Ref=360,100

| Peak #  | RetTime [min] | Type | Width [min] | Area [mAU*s] | Height [mAU] | Area %  |
|---------|---------------|------|-------------|--------------|--------------|---------|
| 1       | 11.778        | PP   | 0.4947      | 1.08989e4    | 333.98276    | 95.4995 |
| 2       | 14.705        | MM   | 0.5366      | 513.61957    | 15.95436     | 4.5005  |
| Totals: |               |      |             | 1.14125e4    | 349.93711    |         |

Table 2, entry 9: Chiralpak® AD-H column, 24cm×4.6 mm I.D., Hexanes:IPA = 85:15, 1.5 mL/min.

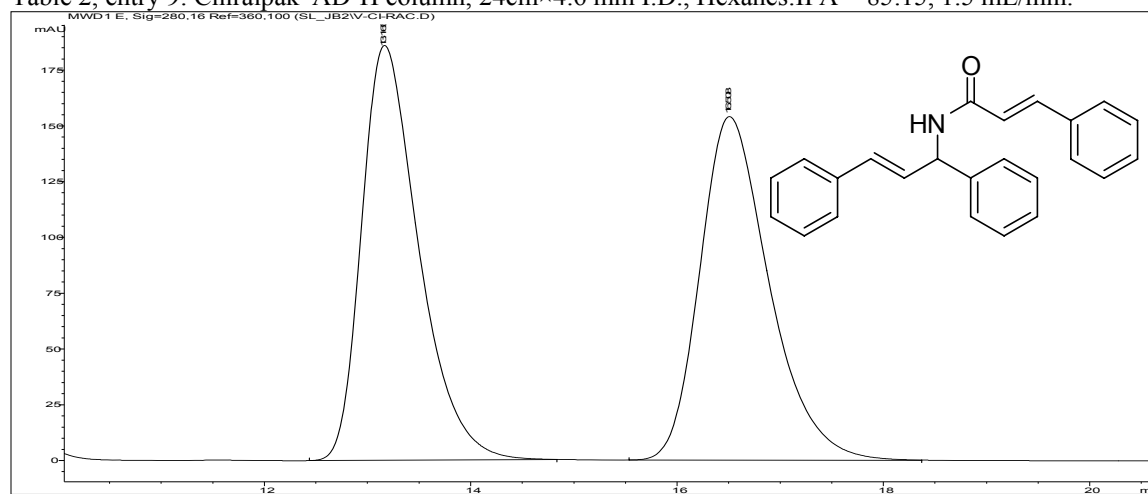

Signal 5: MWD1 E, Sig=280,16 Ref=360,100

| Peak #   | RetTime [min] | Type | Width [min] | Area [mAU*s] | Height [mAU] | Area %  |
|----------|---------------|------|-------------|--------------|--------------|---------|
| 1        | 13.165        | BB   | 0.5823      | 7147.42920   | 185.98766    | 49.8895 |
| 2        | 16.508        | BB   | 0.7078      | 7179.10254   | 154.00832    | 50.1105 |
| Totals : |               |      |             | 1.43265e4    | 339.99597    |         |

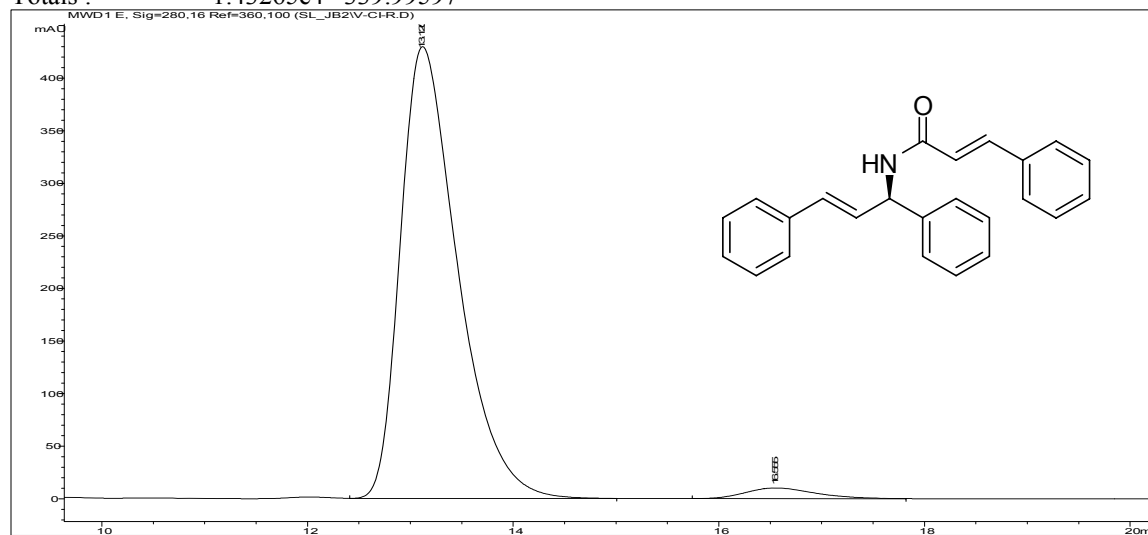

Signal 5: MWD1 E, Sig=280,16 Ref=360,100

| Peak #   | RetTime [min] | Type | Width [min] | Area [mAU*s] | Height [mAU] | Area %  |
|----------|---------------|------|-------------|--------------|--------------|---------|
| 1        | 13.120        | VB   | 0.5897      | 1.66416e4    | 429.84842    | 98.5705 |
| 2        | 16.555        | MM   | 0.5440      | 241.33760    | 7.39349      | 1.4295  |
| Totals : |               |      |             | 1.68829e4    | 437.24191    |         |

Table 2, entry 10: Chiralpak® AD-H column, 24cm×4.6 mm I.D., Hexanes:IPA = 85:15, 1.5 mL/min.

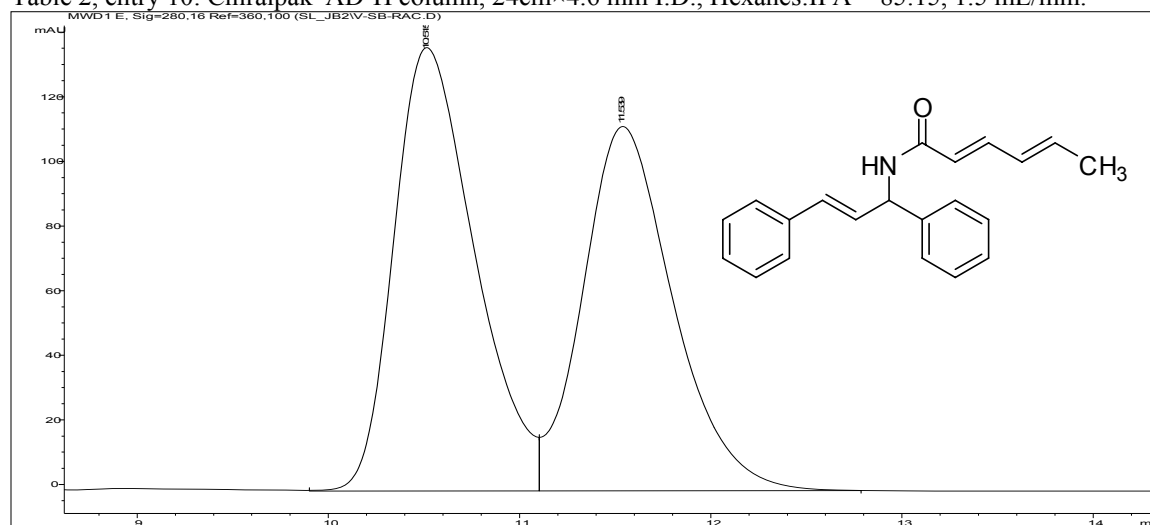

Signal 5: MWD1 E, Sig=280,16 Ref=360,100

| Peak #  | RetTime [min] | Type | Width [min] | Area [mAU*s] | Height [mAU] | Area %  |
|---------|---------------|------|-------------|--------------|--------------|---------|
| 1       | 10.515        | VV   | 0.4511      | 4035.35938   | 137.22482    | 52.1316 |
| 2       | 11.539        | VB   | 0.4993      | 3705.35937   | 112.76820    | 47.8684 |
| Totals: |               |      |             | 7740.71875   | 249.99302    |         |

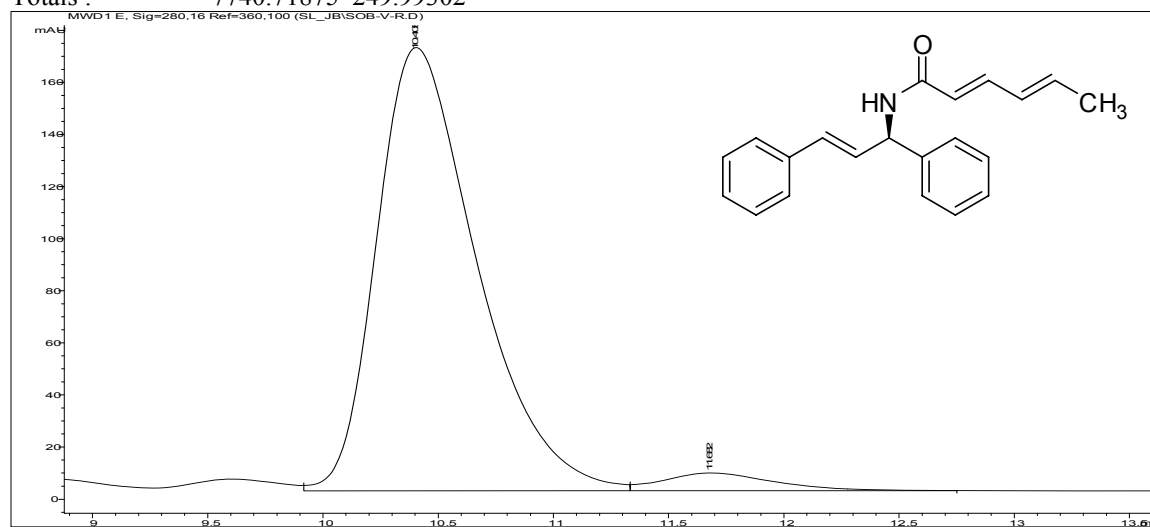

Signal 5: MWD1 E, Sig=280,16 Ref=360,100

| Peak #  | RetTime [min] | Type | Width [min] | Area [mAU*s] | Height [mAU] | Area %  |
|---------|---------------|------|-------------|--------------|--------------|---------|
| 1       | 10.405        | VV   | 0.4601      | 5138.36768   | 170.23669    | 97.4833 |
| 2       | 11.684        | MM   | 0.4292      | 132.65646    | 5.15075      | 2.5167  |
| Totals: |               |      |             | 5271.02414   | 175.38745    |         |

Table 2, entry 11: Chiralpak® AD-H column, 24cm×4.6 mm I.D., Hexanes:IPA = 90:10, 1.0 mL/min.

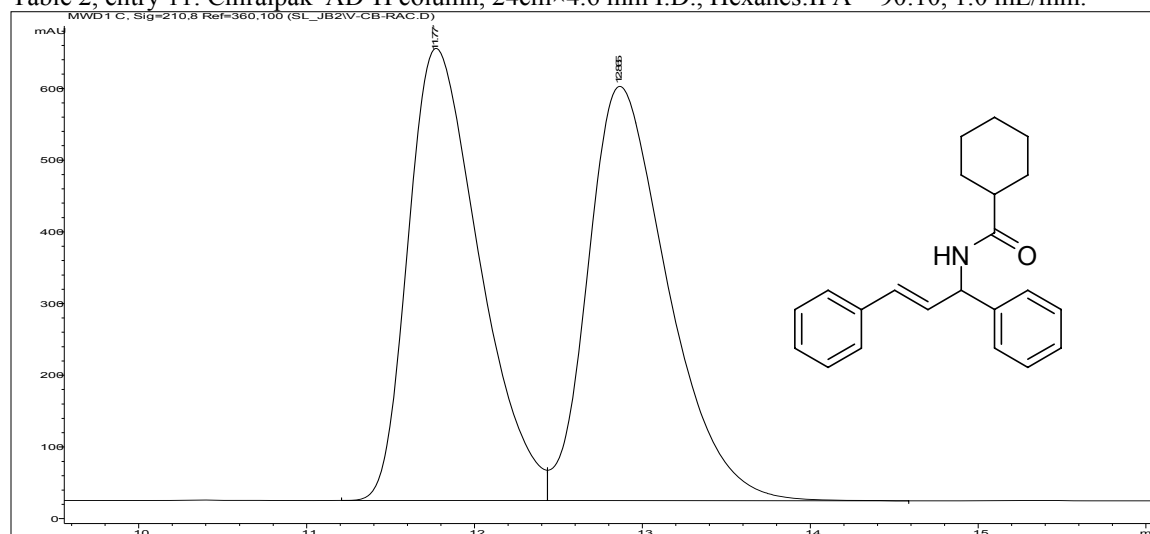

Signal 3: MWD1 C, Sig=210,8 Ref=360,100

| Peak #   | RetTime [min] | Type | Width [min] | Area [mAU*s] | Height [mAU] | Area %  |
|----------|---------------|------|-------------|--------------|--------------|---------|
| 1        | 11.771        | PV   | 0.4516      | 1.85687e4    | 630.54828    | 49.3201 |
| 2        | 12.865        | VB   | 0.5053      | 1.90806e4    | 577.78467    | 50.6799 |
| Totals : |               |      |             | 3.76493e4    | 1208.33295   |         |

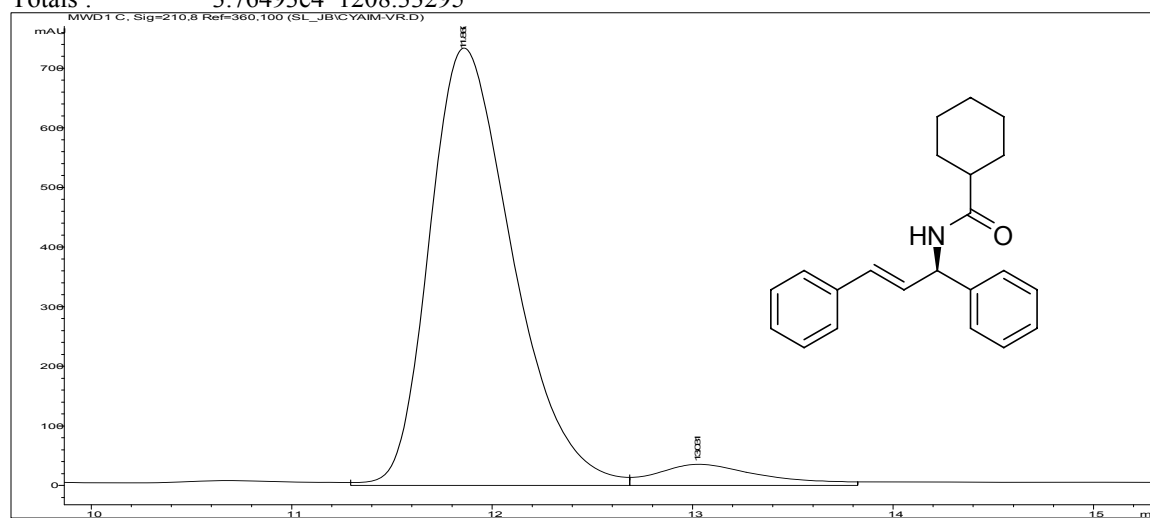

Signal 3: MWD1 C, Sig=210,8 Ref=360,100

| Peak #   | RetTime [min] | Type | Width [min] | Area [mAU*s] | Height [mAU] | Area %  |
|----------|---------------|------|-------------|--------------|--------------|---------|
| 1        | 11.860        | MM   | 0.4719      | 2.06098e4    | 727.91095    | 97.3456 |
| 2        | 13.031        | MM   | 0.3994      | 561.97772    | 23.45109     | 2.6544  |
| Totals : |               |      |             | 2.11718e4    | 751.36204    |         |

## HPLC Analysis of Chiral Propargyl Amide Products

Table 3. Entry 1 : Chiralpak® AD-H column, 24cm×4.6 mm I.D., Hexanes:IPA = 90:10, 1.5mL/min  
(*R*) catalyst was used

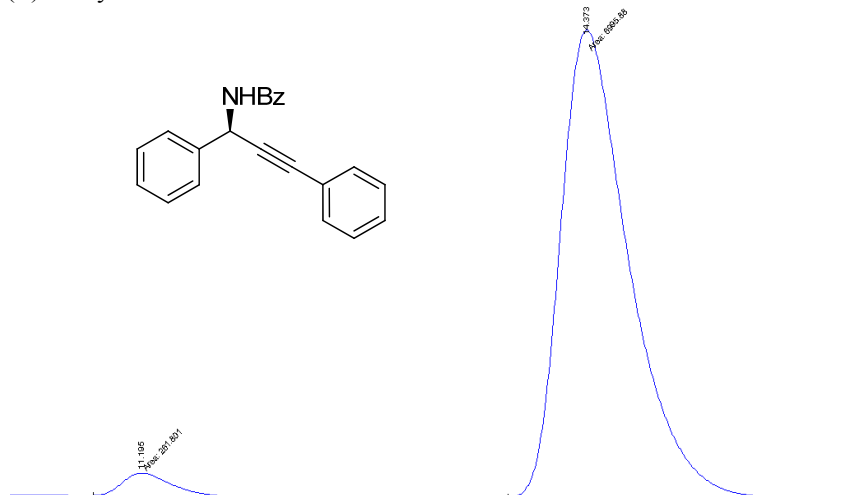

| Peak # | RetTime [min] | Type | Width [min] | Area [mAU*s] | Height [mAU] | Area %  |
|--------|---------------|------|-------------|--------------|--------------|---------|
| 1      | 11.195        | MM   | 0.4216      | 261.80148    | 10.35062     | 3.6072  |
| 2      | 14.373        | MM   | 0.5658      | 6995.87988   | 206.06712    | 96.3928 |

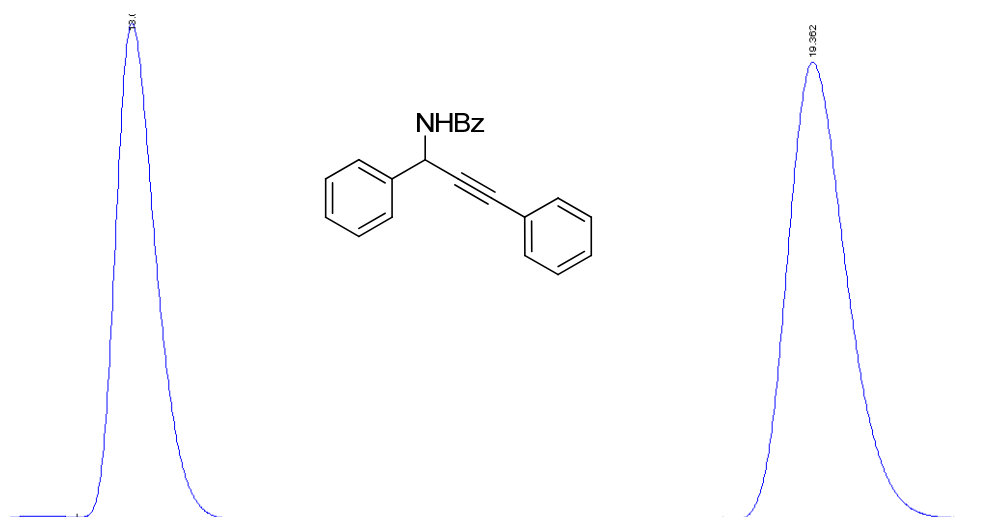

| Peak # | RetTime [min] | Type | Width [min] | Area [mAU*s] | Height [mAU] | Area %  |
|--------|---------------|------|-------------|--------------|--------------|---------|
| 1      | 13.036        | VV   | 0.4085      | 4320.11572   | 163.35086    | 42.5697 |
| 2      | 19.362        | VV   | 0.5883      | 5828.20898   | 150.32806    | 57.4303 |

Table 3. Entry 2. : Chiralpak® AD-H column, 24cm×4.6 mm I.D., Hexanes:IPA = 90:10, 1.5mL/min  
(*R*) catalyst was used

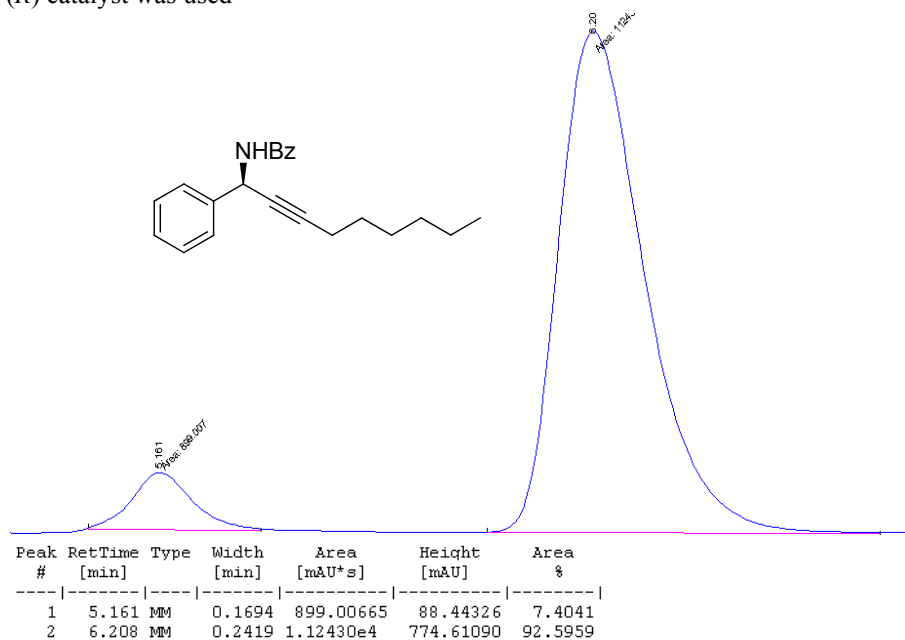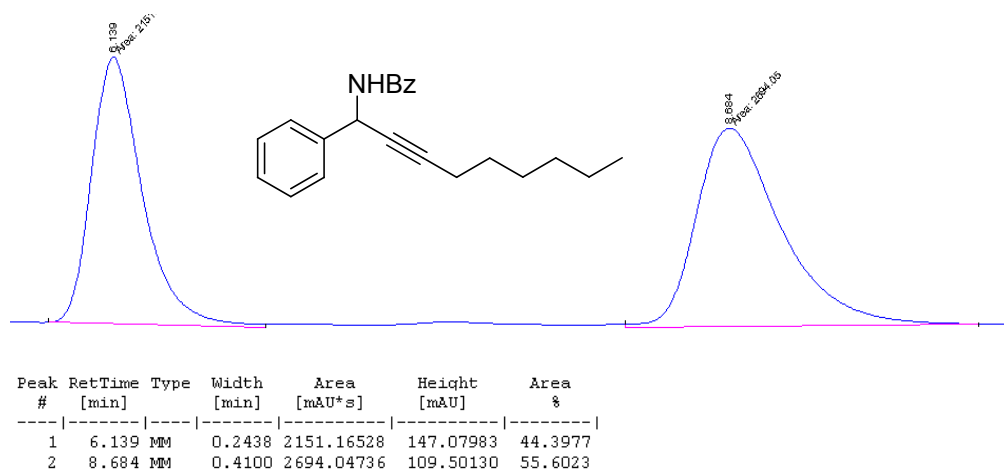

Table 3. Entry 3. : Chiralpak® AD-H column, 24cm×4.6 mm I.D., Hexanes:IPA = 90:10, 1.5mL/min  
(*R*) catalyst was used

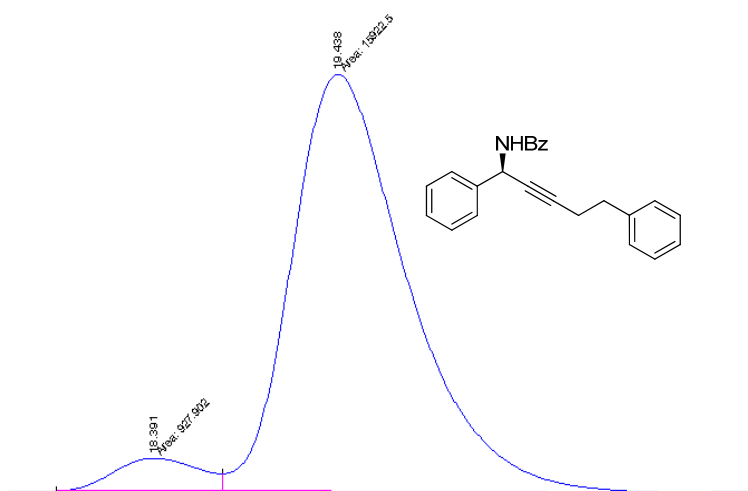

| Peak # | RetTime [min] | Type | Width [min] | Area [mAU*s] | Height [mAU] | Area %  |
|--------|---------------|------|-------------|--------------|--------------|---------|
| 1      | 18.389        | MM   | 0.4634      | 61.09267     | 2.19745      | 3.3945  |
| 2      | 19.438        | MM   | 0.7375      | 1738.64209   | 39.28995     | 96.6055 |

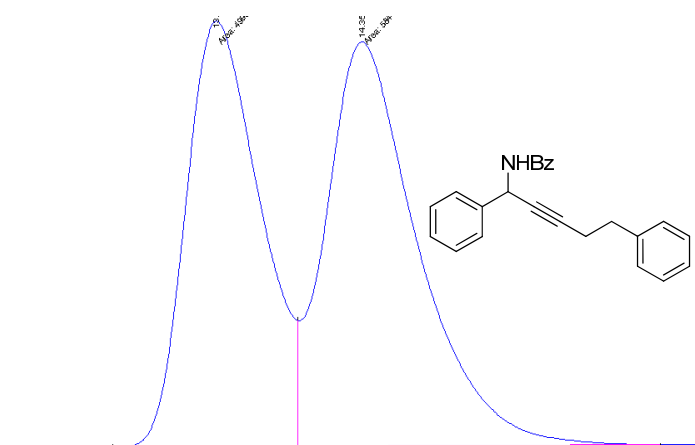

| Peak # | RetTime [min] | Type | Width [min] | Area [mAU*s] | Height [mAU] | Area %  |
|--------|---------------|------|-------------|--------------|--------------|---------|
| 1      | 13.561        | VV   | 0.4369      | 5162.37842   | 178.76657    | 46.4911 |
| 2      | 14.354        | VB   | 0.5157      | 5941.64355   | 169.17618    | 53.5089 |



Table 3. Entry 4. : Chiralpak® AD-H column, 24cm×4.6 mm I.D., Hexanes:IPA = 90:10, 1.5mL/min  
(*R*) catalyst was used

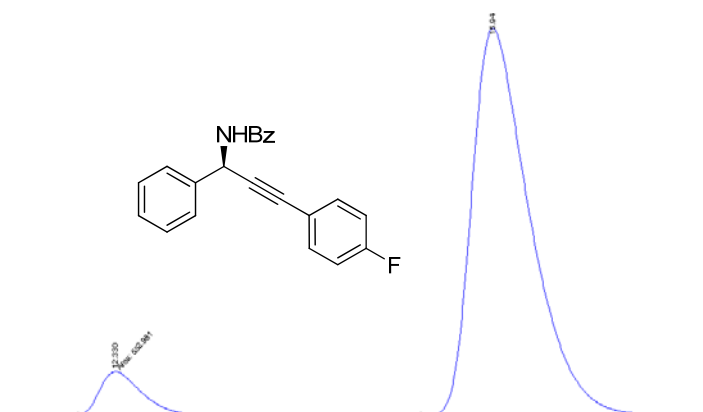

| Peak # | RetTime [min] | Type | Width [min] | Area [mAU*s] | Height [mAU] | Area %  |
|--------|---------------|------|-------------|--------------|--------------|---------|
| 1      | 12.330        | MM   | 0.4625      | 552.98102    | 19.92714     | 7.5689  |
| 2      | 15.944        | PB   | 0.5704      | 6752.95557   | 174.93858    | 92.4311 |

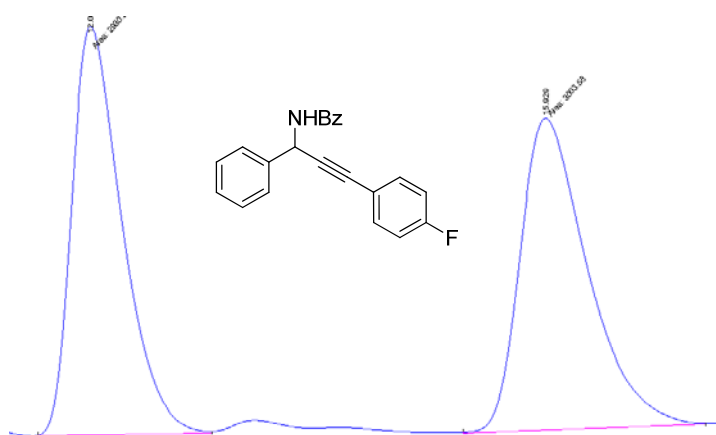

| Peak # | RetTime [min] | Type | Width [min] | Area [mAU*s] | Height [mAU] | Area %  |
|--------|---------------|------|-------------|--------------|--------------|---------|
| 1      | 12.079        | MM   | 0.4923      | 2930.01099   | 99.19130     | 49.3800 |
| 2      | 15.929        | MM   | 0.6614      | 3003.58276   | 75.68545     | 50.6200 |

Table 3. Entry 5. : Chiralpak® AD-H column, 24cm×4.6 mm I.D., Hexanes:IPA = 90:10, 1.5mL/min  
(*R*) catalyst was used

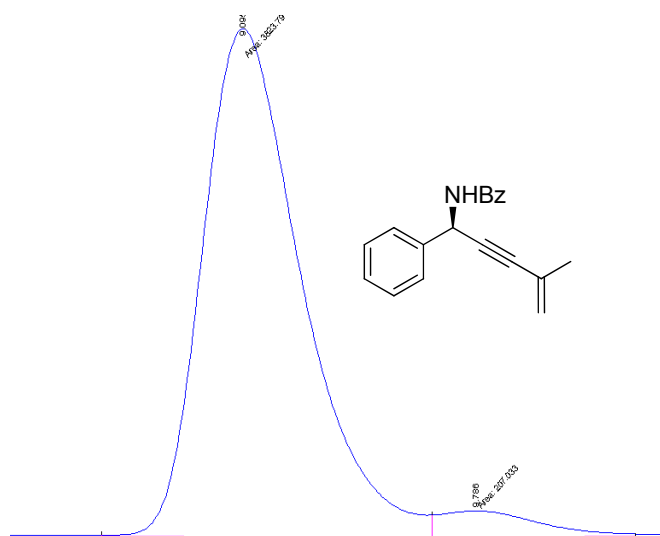

| Peak # | RetTime [min] | Type | Width [min] | Area [mAU*s] | Height [mAU] | Area %  |
|--------|---------------|------|-------------|--------------|--------------|---------|
| 1      | 9.095         | MM   | 0.3404      | 3823.79004   | 187.19911    | 94.8638 |
| 2      | 9.786         | MM   | 0.3427      | 207.03310    | 10.06764     | 5.1362  |

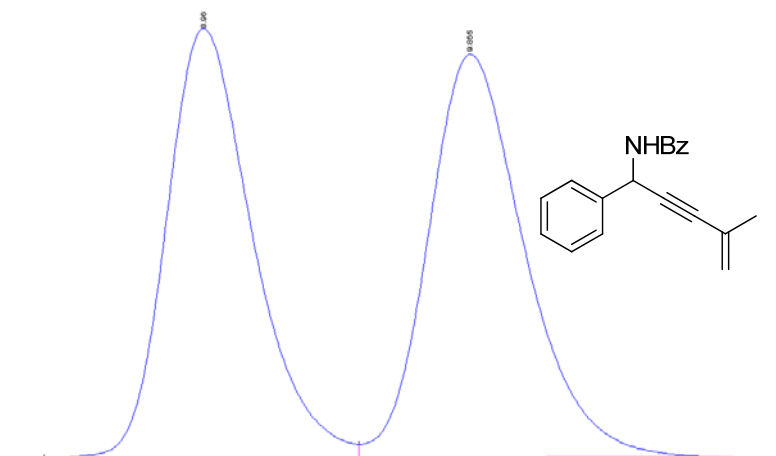

| Peak # | RetTime [min] | Type | Width [min] | Area [mAU*s] | Height [mAU] | Area %  |
|--------|---------------|------|-------------|--------------|--------------|---------|
| 1      | 8.966         | BV   | 0.3071      | 1759.43347   | 87.29553     | 48.7458 |
| 2      | 9.865         | VB   | 0.3433      | 1849.97168   | 81.96229     | 51.2542 |

Table 3. Entry 6. : Chiralpak® AD-H column, 24cm×4.6 mm I.D., Hexanes:IPA = 90:10, 1.5mL/min  
(*R*) catalyst was used

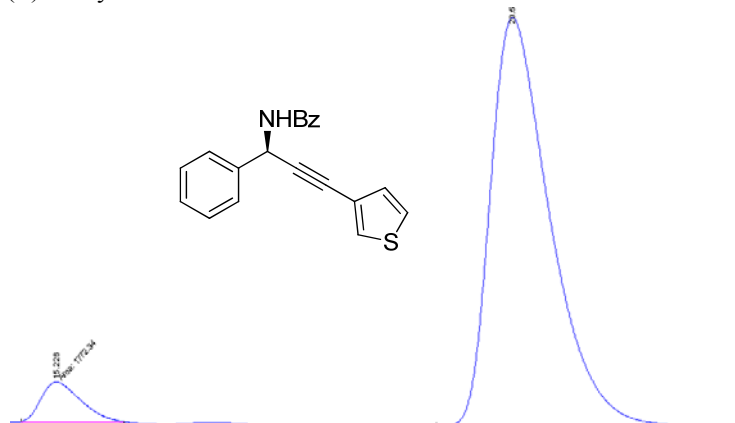

| Peak # | RetTime [min] | Type | Width [min] | Area [mAU*s] | Height [mAU] | Area %  |
|--------|---------------|------|-------------|--------------|--------------|---------|
| 1      | 15.226        | MM   | 0.5430      | 1772.34412   | 54.39542     | 6.1875  |
| 2      | 20.575        | PB   | 0.7316      | 2.68714e4    | 554.26508    | 93.8125 |

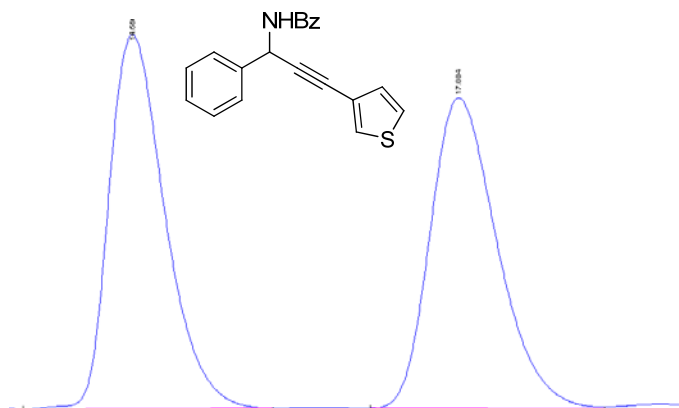

| Peak # | RetTime [min] | Type | Width [min] | Area [mAU*s] | Height [mAU] | Area %  |
|--------|---------------|------|-------------|--------------|--------------|---------|
| 1      | 14.560        | VB   | 0.6138      | 6539.17334   | 165.20605    | 50.0483 |
| 2      | 17.884        | PB   | 0.7347      | 6526.55615   | 137.26483    | 49.9517 |

Table 3. Entry 7. : Chiralpak® AD-H column, 24cm×4.6 mm I.D., Hexanes:IPA = 90:10, 1.5mL/min  
(*R*) catalyst was used

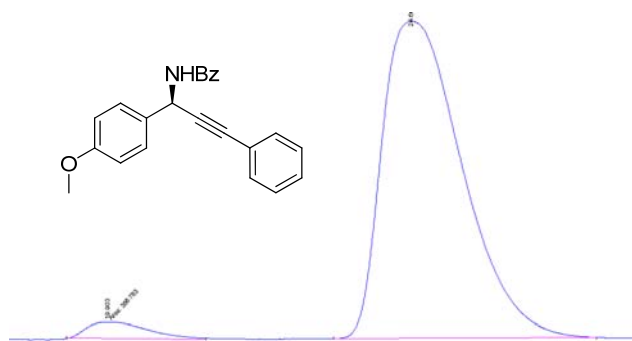

| Peak # | RetTime [min] | Type | Width [min] | Area [mAU*s] | Height [mAU] | Area %  |
|--------|---------------|------|-------------|--------------|--------------|---------|
| 1      | 19.903        | MM   | 1.1154      | 368.76337    | 5.51027      | 3.9129  |
| 2      | 24.600        | BB   | 1.3114      | 9055.55176   | 104.87513    | 96.0871 |

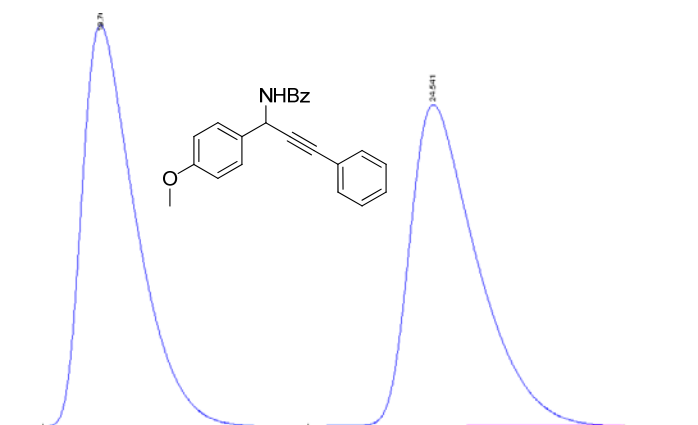

| Peak # | RetTime [min] | Type | Width [min] | Area [mAU*s] | Height [mAU] | Area %  |
|--------|---------------|------|-------------|--------------|--------------|---------|
| 1      | 19.760        | BB   | 0.7970      | 1.20932e4    | 223.59499    | 49.9431 |
| 2      | 24.541        | BB   | 0.9938      | 1.21208e4    | 179.05164    | 50.0569 |

Table 3. Entry 8 : Chiralpak® AD-H column, 24cm×4.6 mm I.D., Hexanes:IPA = 90:10, 1.5mL/min  
(*R*) catalyst was used

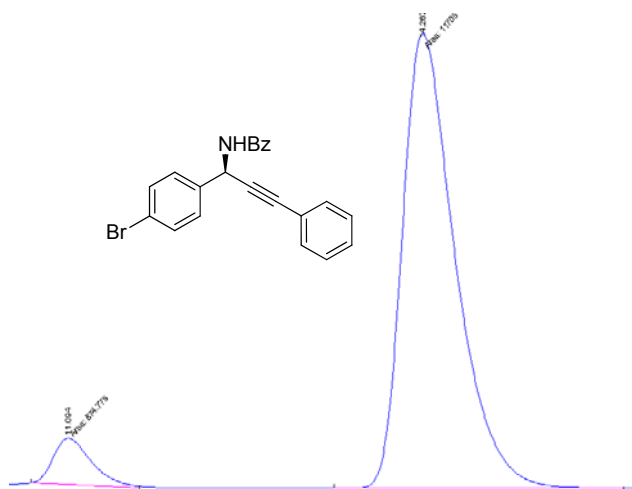

| Peak # | RetTime [min] | Type | Width [min] | Area [mAU*s] | Height [mAU] | Area %  |
|--------|---------------|------|-------------|--------------|--------------|---------|
| 1      | 11.094        | MM   | 0.4005      | 874.77490    | 36.40479     | 6.9538  |
| 2      | 14.267        | MM   | 0.5498      | 1.17050e4    | 354.85269    | 93.0462 |

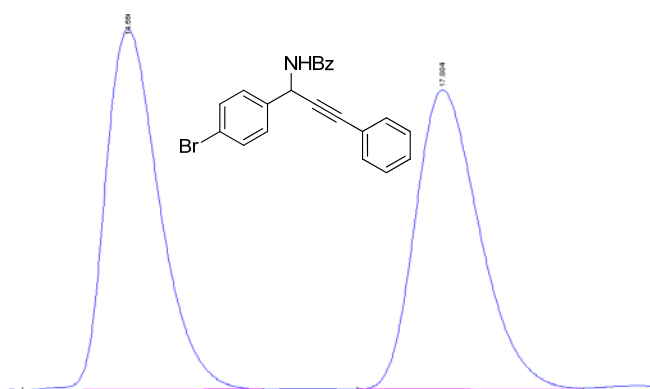

| Peak # | RetTime [min] | Type | Width [min] | Area [mAU*s] | Height [mAU] | Area %  |
|--------|---------------|------|-------------|--------------|--------------|---------|
| 1      | 14.560        | VB   | 0.6138      | 6539.17334   | 165.20605    | 50.0483 |
| 2      | 17.884        | PB   | 0.7347      | 6526.55615   | 137.26483    | 49.9517 |

Table 3. Entry 9. : Chiralpak® AD-H column, 24cm×4.6 mm I.D., Hexanes:IPA = 90:10, 1.5mL/min  
(*R*) catalyst was used

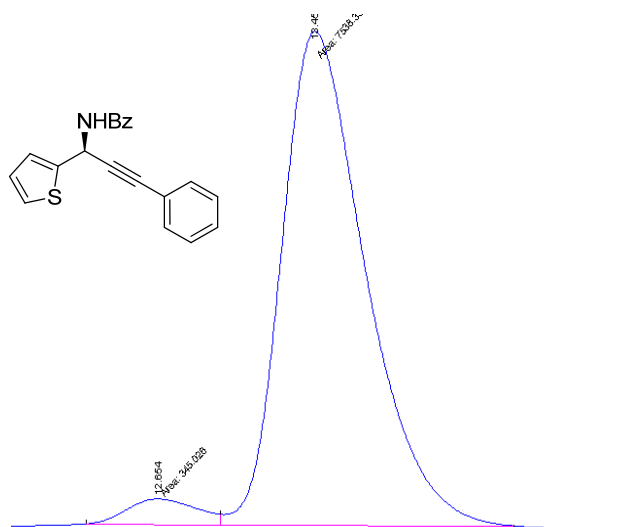

| Peak # | RetTime [min] | Type | Width [min] | Area [mAU*s] | Height [mAU] | Area %  |
|--------|---------------|------|-------------|--------------|--------------|---------|
| 1      | 12.654        | MF   | 0.4236      | 345.02615    | 13.57430     | 4.3766  |
| 2      | 13.456        | FM   | 0.4969      | 7538.33447   | 252.83704    | 95.6234 |

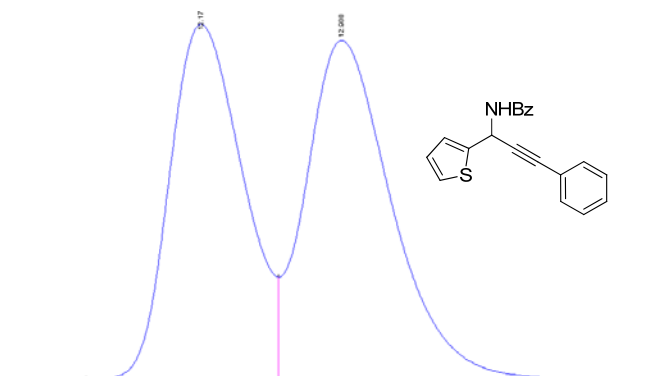

| Peak # | RetTime [min] | Type | Width [min] | Area [mAU*s] | Height [mAU] | Area %  |
|--------|---------------|------|-------------|--------------|--------------|---------|
| 1      | 12.178        | BV   | 0.4568      | 4301.15674   | 146.38029    | 47.1997 |
| 2      | 12.988        | VB   | 0.5200      | 4811.52686   | 139.63887    | 52.8003 |

Table 3. Entry 10: Chiralpak® AD-H column, 24cm×4.6 mm I.D., Hexanes:IPA = 90:10, 1.5mL/min  
(*R*) catalyst was used

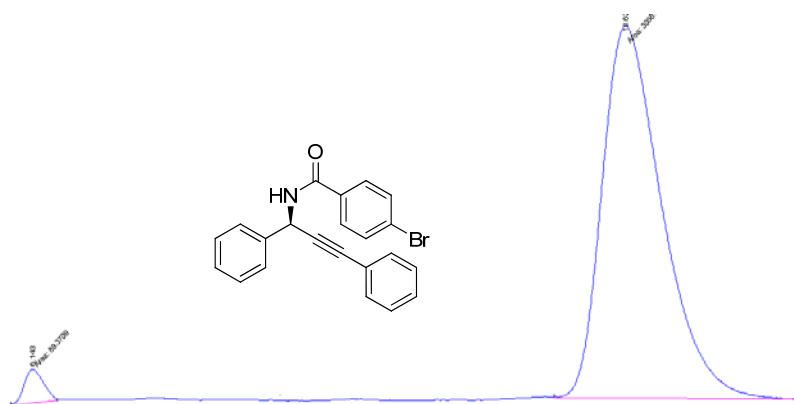

| Peak # | RetTime [min] | Type | Width [min] | Area [mAU*s] | Height [mAU] | Area %  |
|--------|---------------|------|-------------|--------------|--------------|---------|
| 1      | 6.143         | MM   | 0.2780      | 89.37092     | 5.35837      | 2.8406  |
| 2      | 13.624        | MM   | 0.8583      | 3056.79736   | 59.35861     | 97.1594 |

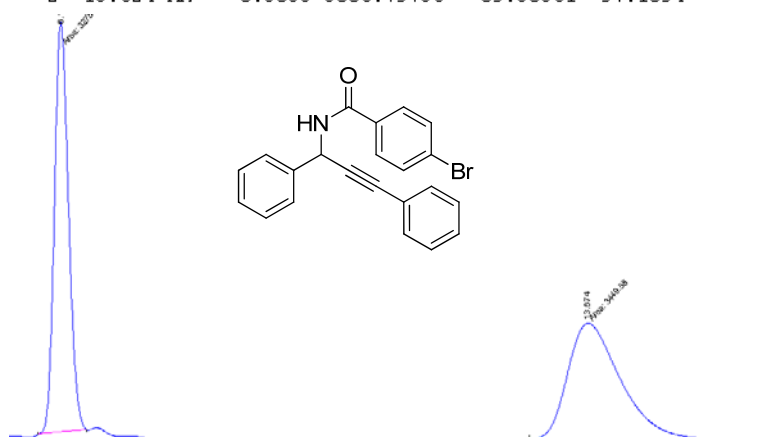

| Peak # | RetTime [min] | Type | Width [min] | Area [mAU*s] | Height [mAU] | Area %  |
|--------|---------------|------|-------------|--------------|--------------|---------|
| 1      | 6.172         | MM   | 0.2333      | 3275.68286   | 233.99246    | 48.7071 |
| 2      | 13.674        | MM   | 0.8713      | 3449.58179   | 65.98219     | 51.2929 |

Table 3. Entry 11. : Chiralpak<sup>®</sup> AD-H column, 24cm×4.6 mm I.D., Hexanes:IPA = 90:10, 1.5mL/min  
(*R*) catalyst was used

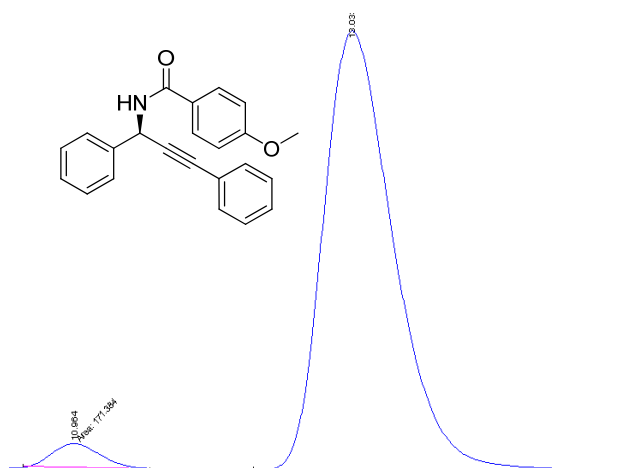

| Peak # | RetTime [min] | Type | Width [min] | Area [mAU*s] | Height [mAU] | Area %  |
|--------|---------------|------|-------------|--------------|--------------|---------|
| 1      | 10.964        | MM   | 0.4178      | 171.38419    | 6.83652      | 3.6190  |
| 2      | 13.033        | BB   | 0.5498      | 4564.22998   | 125.65913    | 96.3810 |

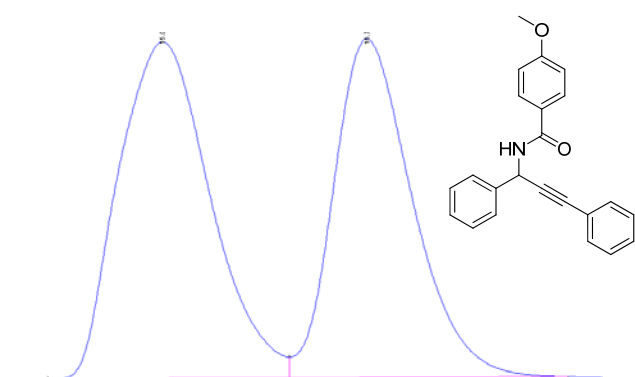

| Peak # | RetTime [min] | Type | Width [min] | Area [mAU*s] | Height [mAU] | Area %  |
|--------|---------------|------|-------------|--------------|--------------|---------|
| 1      | 15.044        | BV   | 0.8263      | 6051.69971   | 115.69158    | 53.5886 |
| 2      | 16.722        | VB   | 0.6832      | 5241.18164   | 116.42956    | 46.4114 |



## References

---

- [1] McDougal, N. T.; Trevellini, W. L.; Rodgen, S. A.; Kliman, L. T.; Schaus, S. E. *Adv. Synth. Catal.* **2004**, *346*, 1231-1240.
- [2] Lou, S.; Moquist, P. N.; Schaus, S. E. *J. Am. Chem. Soc.*, **2007**, *129*, 15398-15404.
- [3] Pratti, F.; Spaggiari, A.; Blaszzak, L. C. *Org. Lett.*, **2004**, *6*, 3885-3888.
- [4] a.) N. Hermanns; S. Dahmen; C. Bolm; S. Brase, *Angew. Chem.* **2002**, *114*, 3844-3846; N. Hermanns; S. Dahmen; C. Bolm; S. Brase, *Angew. Chem. Int. Ed.* **2002**, *41*, 3692-3694. b.) R. B. C. Jagt; P. Y. Toullec; D. Geerdink; J. G. de Vries; B. L.Feringa; A. J. Minnaard, *Angew. Chem.* **2006**, *118*, 2855-2857; R. B. C. Jagt; P. Y. Toullec; D. Geerdink; J. G. de Vries; B. L.Feringa; A. J. Minnaard, *Angew. Chem. Int. Ed.* **2006**, *45*, 2789-2791
- [5] Hayashi, T.; Yamamoto, A.; Ito, Y.; Nishioka, E.; Miura, H.; Yanagi, K. *J. Am. Chem. Soc.* **1989**, *111*, 6301-6311.
- [6] Chong, J. M.; Wu, T. R. *Org. Lett.*, **2006**, *8*, 15-18.
- [7] Corey, E. J.; Decicco, C. P.; newbold, R. C. *Tet. Lett.*, **1991**, *32*, 5287-5290.
- [8] C. H. Senanayake; D. A. Pflum; D. Krishnamurthy; Z. Han; S. A.Wald, *Tet. Lett.* **2002**, *43*, 923-926.
